# Supplementary material for: Breaking conjugation: unusual regioselectivity with 2-substituted allylic substrates in the Tsuji–Trost reaction
Source: Royal Society of Chemistry journal article supplement (doi:10.1039/c3sc53035c), 2014-01-01
Supplement: c3sc53035c.pdf [file c3sc53035c.pdf]

# Breaking Conjugation: Unusual Regioselectivity with 2-Substituted Allylic Substrates in the Tsuji-Trost Reaction

Byeong-Seon Kim,<sup>†</sup> Mahmud M. Hussain,<sup>†</sup> Per-Ola Norrby,<sup>‡</sup> and Patrick J. Walsh<sup>†,\*</sup>

<sup>†</sup>Roy and Diana Vagelos Laboratories, Penn/Merck Laboratory for High-Throughput Experimentation, Department of Chemistry, University of Pennsylvania, 231 South 34th Street, Philadelphia, Pennsylvania 19104-6323, United States.

<sup>‡</sup>University of Gothenburg, Department of Chemistry and Molecular Biology, Kemigården 4, #8076, SE-412 96 Göteborg, Sweden

[pwalsh@sas.upenn.edu](mailto:pwalsh@sas.upenn.edu)

| Table of Contents                                                  | Page |
|--------------------------------------------------------------------|------|
| 1. General Methods                                                 | S1   |
| 2. Preparation of 2-Substituted Allylic Substrates                 | S2   |
| 3. Palladium Catalyzed Allylic Substitution of Allylic Acetates    | S10  |
| 4. Computational Studies                                           | S22  |
| 5. References                                                      | S49  |
| 6. <sup>1</sup> H and <sup>13</sup> C{ <sup>1</sup> H} NMR Spectra | S50  |

**1. General Methods.** All reactions were performed under a nitrogen atmosphere with oven-dried glassware. All manipulations involving dicyclohexylborane, dimethylzinc and diethylzinc were carried out under an inert atmosphere in a Vacuum Atmospheres drybox with an attached MO-40 DriTrain or by using standard Schlenk or vacuum line techniques. Chemicals were obtained from Aldrich, Acros, or GFS Chemicals unless otherwise specified. Solvents were purchased from Fischer Scientific. Toluene was dried through an activated alumina column, and then thoroughly degassed prior to use. Tetrahydrofuran was distilled from sodium and benzophenone under N<sub>2</sub>. B(pin)-substituted alkynes

were prepared by literature methods.<sup>1,2</sup> Dimethylzinc and diethylzinc solutions (2.0 M in toluene) were prepared and stored in a Vacuum Atmospheres drybox. NMR spectra were obtained on Bruker 300, 360, 400 or 500 MHz Fourier transform spectrometers at the University of Pennsylvania NMR facility. <sup>1</sup>H and <sup>13</sup>C{<sup>1</sup>H} NMR spectra were referenced to residual solvent. <sup>11</sup>B{<sup>1</sup>H} NMR spectra were referenced to BF<sub>3</sub>·OEt<sub>2</sub>. The infrared spectra were obtained using a Perkin-Elmer 1600 series spectrometer. HRMS data was obtained on a Waters LC-TOF mass spectrometer (model LCT-XE Premier) using electrospray ionization in positive or negative mode, depending on analyte. Thin-layer chromatography was performed on Whatman precoated silica gel 60 F-254 plates and visualized by ultraviolet light or by staining with ceric ammonium molybdate or phosphomolybdic acid solutions or with iodine. Silica gel (Silicaflash, P60, 40-63 μm, Silicycle) was used for air-flashed chromatography. Analysis of regioisomeric ratios was performed by analysis of <sup>1</sup>H NMR spectra of unpurified reaction products. The vinyl boronate ester is susceptible to oxidation of the B–C bond on silica under air, and hence a rapid purification is necessary to minimize oxidation to the corresponding ketone.

**Caution.** *Dialkylzinc reagents are pyrophoric. Care must be used when handling them.*

## 2. Preparation of 2-Substituted Allylic Substrates

**General Procedure A: Synthesis of B(pin)-Substituted Allylic Acetates.** To a suspension of HBCy<sub>2</sub> (770 mg, 4.32 mmol) in toluene (4.0 mL) equipped with a stir bar under N<sub>2</sub> was added alkyne-4,4,5,5-tetramethyl-[1,3,2]-dioxaborolane (4.32 mmol) and the reaction mixture was stirred at rt for 30 min, after which it was homogeneous. The reaction vessel was cooled to –78 °C in a dry ice bath, treated with Me<sub>2</sub>Zn (2.16 mL, 2.0 M in toluene, 4.32 mmol), and stirred at that temperature for 30 min. The solution was then warmed to –20 °C by placing the flask in a –20 °C cold bath, and aldehyde (3.60 mmol) was added. The reaction mixture was stirred at –20 °C until TLC showed complete consumption of the aldehyde (usually 12 h). When the reaction was complete, the reaction mixture was warmed to 0 °C in

an ice bath and distilled acetic anhydride (1.1 g, 1.02 mL, 10.8 mmol) was slowly added. The reaction mixture was stirred at 0 °C until TLC showed complete consumption of the intermediate allylic alkoxide (usually 4–6 h). The reaction mixture was then diluted with EtOAc (10 mL) and quenched with saturated NH<sub>4</sub>Cl (15 mL) at 0 °C. The organic layer was separated and the aqueous solution was extracted with EtOAc (3 x 25 mL). The combined organic solution was dried over MgSO<sub>4</sub>, filtered, and the solvent was removed under reduced pressure to yield a colorless oil. The crude product was purified by flash column chromatography on silica gel (hexanes:EtOAc = 97:3) to afford the allylic acetate as a colorless oil. Importantly, the 2-B(pin) allylic acetate product is susceptible to oxidation of the B–C bond on silica under air, and hence a rapid purification is necessary to minimize oxidation to the ketone. The allylic acetate are stored under N<sub>2</sub> at 0 °C to preserve their purity.

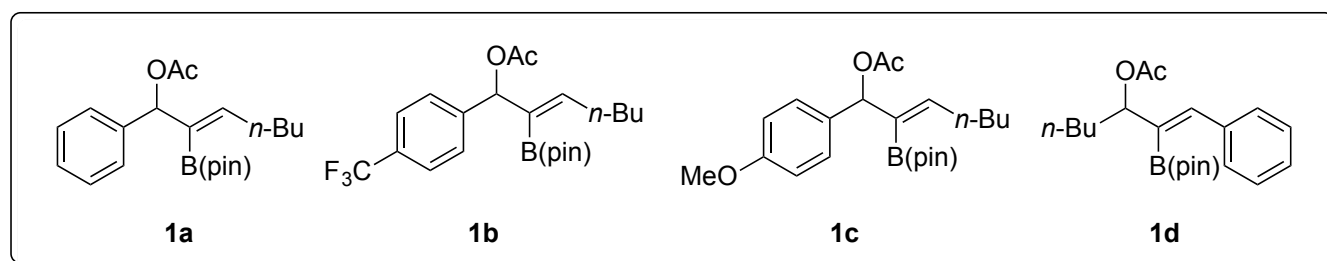

2-B(pin) substituted allylic acetates **1a–d** were prepared by General Procedure A according to our previous communication.<sup>3</sup>

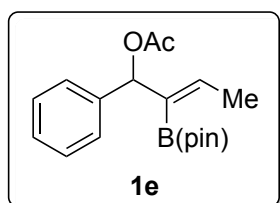

**(E)-1-Phenyl-2-(4,4,5,5-tetramethyl-1,3,2-dioxaborolan-2-yl)but-2-en-1-yl acetate (1e).** The product was prepared by General Procedure A using 4,4,5,5-tetramethyl-2-(prop-1-yn-1-yl)-1,3,2-dioxaborolane (717 mg, 4.32 mmol),

benzaldehyde (382 mg, 366  $\mu$ L, 3.60 mmol). The crude product was purified by flash column chromatography on silica gel (hexanes:EtOAc = 97:3) to afford the allylic acetate as a colorless oil (799 mg, 70% yield). <sup>1</sup>H NMR (300 MHz, CDCl<sub>3</sub>)  $\delta$  7.35 – 7.22 (m, 5H), 6.42 (s, 1H), 6.21 (q,  $J$  = 6.9 Hz,

1H), 2.01 (s, 3H), 1.93 (d,  $J = 6.9$  Hz, 3H), 1.19 (s, 6H), 1.16 (s, 6H);  $^{13}\text{C}\{^1\text{H}\}$  NMR (75 MHz,  $\text{CDCl}_3$ )  $\delta$  170.1, 141.1, 140.3, 128.3, 127.9, 127.7, 83.4, 78.0, 24.9, 24.8, 21.5, 17.3 (the quaternary vinyl C bearing the boron group is not observed);  $^{11}\text{B}$  NMR ( $\text{CDCl}_3$ , 128 MHz)  $\delta$  29.8; IR (neat) 2979, 2933, 1740, 1641, 1407, 1372, 1312, 1267, 1234, 1144  $\text{cm}^{-1}$ ; HRMS  $m/z$  339.1750 [(M+Na) $^+$ ; calcd for  $\text{C}_{18}\text{H}_{25}\text{BO}_4\text{Na}$ : 339.1744].

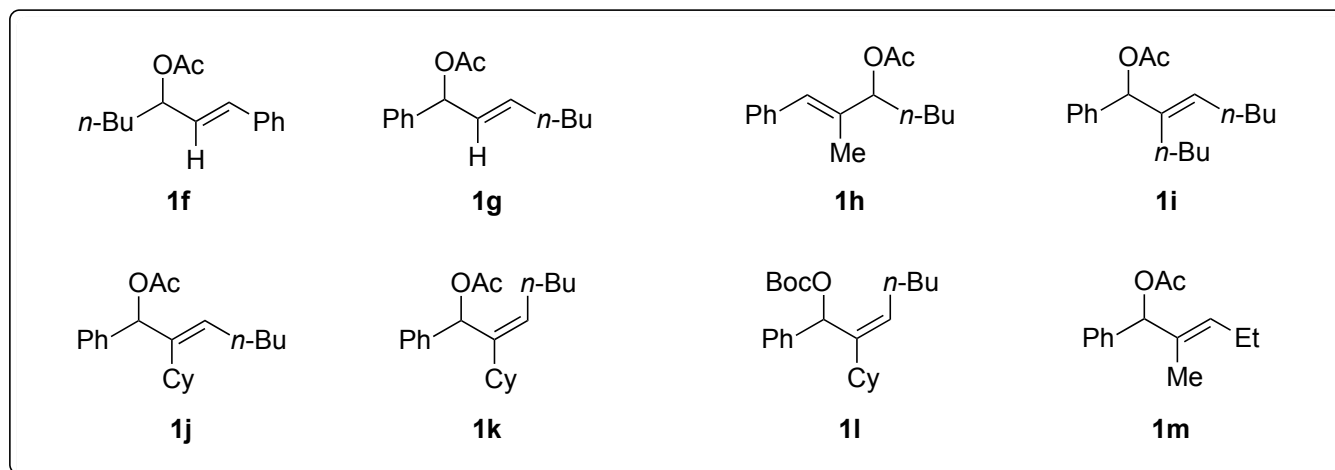

Allylic acetates **1f–h** were prepared according to our previous communication.<sup>3</sup>

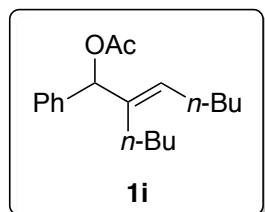

**(E)-2-Butyl-1-phenylhept-2-en-1-yl acetate (1i)**. To a suspension of  $\text{HBCy}_2$  (107 mg, 0.6 mmol) in toluene (1.0 mL) equipped with a stir bar under  $\text{N}_2$  was added 5-decyne (0.11 mL, 0.6 mmol) at 0 °C in an ice bath and the reaction mixture was stirred at rt for 30 min, after which it was homogeneous. The

reaction vessel was cooled to  $-78$  °C in a dry ice bath, treated with  $\text{Et}_2\text{Zn}$  (0.45 mL, 2.0 M in toluene, 0.9 mmol), and stirred at this temperature for 30 min. The solution was then warmed to  $-10$  °C by placing the flask in a  $-10$  °C cold bath, and (–)-MIB (23.9 mg, 0.1 mmol) was added under positive pressure of nitrogen. The solution was stirred for 5 min and benzaldehyde (51  $\mu\text{L}$ , 0.5 mmol) was added.

The reaction mixture was stirred at  $-10\text{ }^{\circ}\text{C}$  for 12 h until TLC showed complete consumption of the aldehyde. The reaction mixture was then warmed to  $0\text{ }^{\circ}\text{C}$  in an ice bath and distilled acetic anhydride (142  $\mu\text{L}$ , 1.5 mmol) was slowly added. The reaction mixture was stirred at  $0\text{ }^{\circ}\text{C}$  for 3 h until TLC showed complete consumption of the intermediate allylic alkoxide. The reaction mixture was then diluted with EtOAc (5 mL) and quenched with saturated  $\text{NH}_4\text{Cl}$  (5 mL) at  $0\text{ }^{\circ}\text{C}$ . The organic layer was separated and the aqueous solution was extracted with EtOAc (3 x 10 mL). The combined organic solution was washed with brine (10 mL), dried over  $\text{MgSO}_4$ , filtered, and the solvent was removed under reduced pressure to yield a colorless oil. The crude product was purified by flash column chromatography on silica gel (hexanes:EtOAc = 97:3) to afford the allylic acetate as a colorless oil (109 mg, 76% yield).  $^1\text{H}$  NMR (300 MHz,  $\text{CDCl}_3$ )  $\delta$  7.34 – 7.24 (m, 5H), 6.22 (s, 1H), 6.52 (t,  $J = 7.5$  Hz, 1H), 2.11 (s, 3H), 2.10 – 2.02 (m, 2H), 2.01 – 1.94 (m, 1H), 1.92 – 1.81 (m, 1H), 1.44 – 1.18 (m, 8H), 0.91 (t,  $J = 7.0$  Hz, 3H), 0.85 (t,  $J = 7.0$  Hz, 3H);  $^{13}\text{C}\{^1\text{H}\}$  NMR (75 MHz,  $\text{CDCl}_3$ )  $\delta$  170.1, 139.6, 137.7, 129.2, 128.4, 127.9, 127.3, 79.1, 32.1, 31.5, 27.9, 27.6, 23.1, 22.7, 21.6, 14.2, 14.1; IR (neat) 2957, 2931, 2872, 2861, 1743, 1466, 1456, 1369, 1233  $\text{cm}^{-1}$ ; HRMS  $m/z$  311.1985 [ $(\text{M}+\text{Na})^+$ ; calcd for  $\text{C}_{19}\text{H}_{28}\text{O}_2\text{Na}$ : 311.1987].

### Preparation of allylic acetate 1j

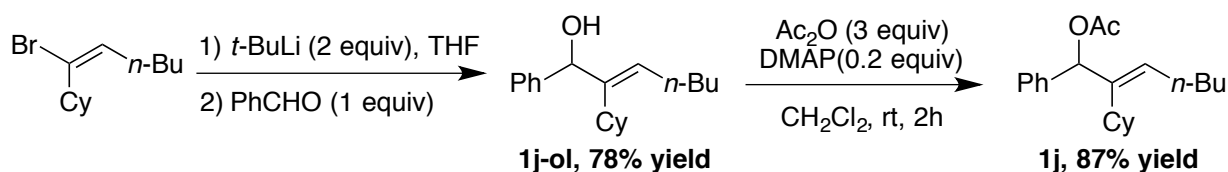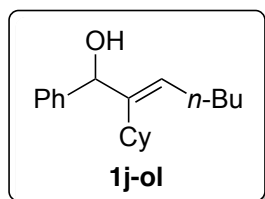

**(E)-2-Cyclohexyl-1-phenylhept-2-en-1-ol (1j-ol).** To an oven-dried Schlenk flask equipped with a stir bar under  $\text{N}_2$  was added (E)-(1-Bromohex-1-en-1-yl)cyclohexane<sup>4</sup> (245 mg, 1.0 mmol) and THF (2 mL). The reaction vessel was

cooled to  $-78\text{ }^{\circ}\text{C}$  in a dry ice bath and stirred for 5 min. *t*-BuLi (1.2 mL, 2.0 mmol, 1.7 M in pentanes) was slowly added over 5 min, causing the solution to become light yellow in color. The reaction mixture was stirred at  $-78\text{ }^{\circ}\text{C}$  for 20 min, and the reaction vessel was transferred to  $0\text{ }^{\circ}\text{C}$  in an ice bath. The reaction mixture was stirred at  $0\text{ }^{\circ}\text{C}$  for 10 min. The reaction vessel was again cooled to  $-78\text{ }^{\circ}\text{C}$  by placing the flask in a dry ice bath. The reaction vessel was stirred at  $-78\text{ }^{\circ}\text{C}$  for 5 min, before benzaldehyde (102  $\mu\text{L}$ , 1.0 mmol) was added slowly and the reaction mixture was slowly warmed to rt over 2 h. The reaction mixture was diluted with EtOAc (5 mL) and quenched with saturated  $\text{NH}_4\text{Cl}$  (10 mL). The organic layer was separated and the aqueous solution was extracted with EtOAc (3 x 10 mL). The combined organic layer was washed with brine (10mL), dried over  $\text{MgSO}_4$ , filtered, and the solvent was removed under reduced pressure to yield a colorless oil. The crude product was purified by flash column chromatography on silica gel (hexanes:EtOAc = 97:3) to afford the allylic alcohol as a colorless oil (231 mg, 78% yield).  $^1\text{H}$  NMR (500 MHz,  $\text{CDCl}_3$ )  $\delta$  7.37 – 7.21 (m, 5H), 5.48 (t,  $J = 7.5$  Hz, 1H), 5.21 (s, 1H), 2.30 (tt,  $J = 12.0$  Hz, 3.5 Hz, 1H), 2.13 (dt,  $J = 7.5$  Hz, 6.8 Hz, 1H), 1.76 – 1.58 (m, 4H), 1.48 (dq,  $J = 12.5$  Hz, 3.5 Hz, 1H), 1.40 – 1.30 (m, 8H), 0.91 (t,  $J = 7.0$  Hz, 3H);  $^{13}\text{C}\{^1\text{H}\}$  NMR (125 MHz,  $\text{CDCl}_3$ )  $\delta$  146.0, 143.6, 128.3, 128.2, 127.3, 127.0, 75.9, 39.7, 32.4, 32.1 (two overlapping resonances), 27.7, 27.3, 27.2, 26.4, 22.7, 14.2; IR (neat) 3369, 2928, 2852, 1493, 1449, 1379, 1239, 1188, 1172, 1014  $\text{cm}^{-1}$ ; HRMS  $m/z$  295.2028 [(M+Na) $^+$ ]; calcd for  $\text{C}_{19}\text{H}_{28}\text{ONa}$ : 295.2038].

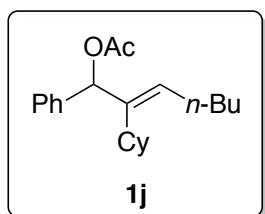

**(*E*)-2-Cyclohexyl-1-phenylhept-2-en-1-yl acetate (1j).** To a 20 mL glass vial equipped with a stir bar was added (*E*)-2-cyclohexyl-1-phenylhept-2-en-1-ol (136 mg, 0.5 mmol) and  $\text{CH}_2\text{Cl}_2$  (1 mL). DMAP (12.2 mg, 0.1 mmol) was added to the solution and the reaction mixture was stirred at rt for 5 min. To the reaction

mixture was added acetic anhydride (142  $\mu\text{L}$ , 1.5 mmol) and the vial was sealed with a screw cap. The reaction mixture was stirred at rt for 2 h. The reaction mixture was diluted with  $\text{CH}_2\text{Cl}_2$  (5 mL) and

quenched with DI water (10 mL). The organic layer was separated and the aqueous solution was extracted with  $\text{CH}_2\text{Cl}_2$  (2 x 10 mL). The combined organic layer was dried over  $\text{MgSO}_4$ , filtered, and the solvent was removed under reduced pressure to yield a colorless oil. The crude product was purified by flash column chromatography on silica gel (hexanes:EtOAc = 98:2) to afford the allylic acetate as a colorless oil (130 mg, 87% yield).  $^1\text{H}$  NMR (500 MHz,  $\text{CDCl}_3$ )  $\delta$  7.33 – 7.21 (m, 5H), 6.29 (s, 1H), 5.41 (t,  $J$  = 7.0 Hz, 1H), 2.34 (tt,  $J$  = 12.0 Hz, 3.5 Hz, 1H), 2.13 (dt,  $J$  = 7.0 Hz, 7.0 Hz, 2H), 2.08 (s, 3H), 1.77 – 1.69 (m, 1H), 1.68 – 1.53 (m, 3H), 1.44 (dq,  $J$  = 12.5 Hz, 3.5 Hz, 1H), 1.38 – 1.04 (m, 9H), 0.90 (t,  $J$  = 7.0 Hz, 3H);  $^{13}\text{C}\{^1\text{H}\}$  NMR (125 MHz,  $\text{CDCl}_3$ )  $\delta$  170.1, 141.8, 140.0, 129.7, 128.3, 127.8, 127.7, 76.8, 40.0, 32.3, 32.0, 31.7, 27.6, 27.2 (two overlapping resonances), 26.3, 22.7, 21.7, 14.3; IR (neat) 2928, 2953, 1741, 1449, 1369, 1232, 1077  $\text{cm}^{-1}$ ; HRMS  $m/z$  337.2140 [(M+Na) $^+$ ; calcd for  $\text{C}_{21}\text{H}_{30}\text{O}_2\text{Na}$ : 337.2144].

### Preparation of allylic acetate 1k.

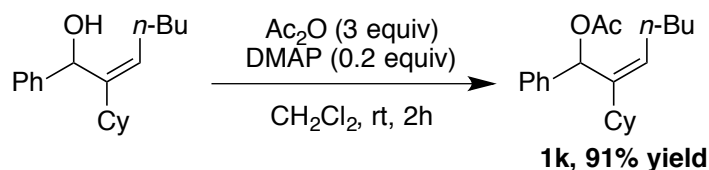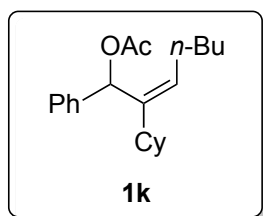

**(Z)-2-Cyclohexyl-1-phenylhept-2-en-1-yl acetate (1k).** To a 20 mL glass vial equipped with a stir bar was added (Z)-2-cyclohexyl-1-phenylhept-2-en-1-ol<sup>5</sup> (120 mg, 0.38 mmol) and  $\text{CH}_2\text{Cl}_2$  (1 mL). DMAP (9.8 mg, 0.08 mmol) was

added to the solution and the reaction mixture was stirred at rt for 5 min. To the reaction mixture was added acetic anhydride (108  $\mu\text{L}$ , 1.14 mmol) and the vial was sealed with a screw cap. The reaction mixture was stirred at rt for 2 h. The reaction mixture was diluted with  $\text{CH}_2\text{Cl}_2$  (5 mL) and quenched with DI water (10 mL). The organic layer was separated and the aqueous solution was extracted with  $\text{CH}_2\text{Cl}_2$  (2 x 10 mL). The combined organic layer was dried over  $\text{MgSO}_4$ , filtered, and the solvent was removed under reduced pressure to yield a colorless oil. The crude product was purified by flash column

chromatography on silica gel (hexanes:EtOAc = 98:2) to afford the allylic acetate as a colorless oil (126 mg, 91% yield).  $^1\text{H}$  NMR (500 MHz,  $\text{CDCl}_3$ )  $\delta$  7.34 – 7.22 (m, 5H), 6.77 (s, 1H), 5.47 (t,  $J = 7.5$  Hz, 1H), 2.33 – 2.20 (m, 2H), 2.15 (s, 3H), 1.88 (tt,  $J = 11.5$  Hz, 3.0 Hz, 1H), 1.73 – 1.65 (m, 2H), 1.63 – 1.55 (m, 2H), 1.42 – 1.00 (m, 10H), 0.90 (t,  $J = 7.0$  Hz, 3H);  $^{13}\text{C}\{^1\text{H}\}$  NMR (125 MHz,  $\text{CDCl}_3$ )  $\delta$  170.2, 142.4, 139.7, 129.4, 128.4, 127.4, 126.2, 74.0, 40.1, 35.2, 34.5, 32.4, 28.0, 27.3, 27.2, 26.5, 22.7, 21.5, 14.3; HRMS  $m/z$  255.2117 [ $(\text{M}-\text{OAc})^+$ ; calcd for  $\text{C}_{19}\text{H}_{27}$ : 255.2113].

### Preparation of allylic carbonate **11**.

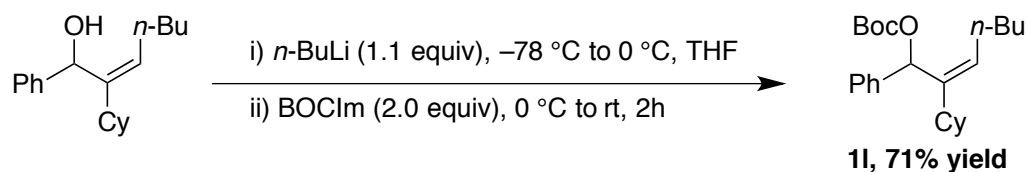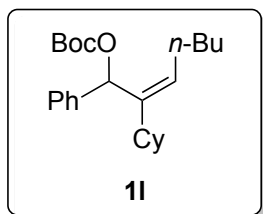

**(Z)-tert-Butyl (2-cyclohexyl-1-phenylhept-2-en-1-yl) carbonate (11).** To a flame-dried round-bottomed flask equipped with a stir bar under  $\text{N}_2$  was added (Z)-2-cyclohexyl-1-phenylhept-2-en-1-ol<sup>5</sup> (150 mg, 0.55 mmol) and THF (2 mL).

The solution was cooled to  $-78$  °C in a dry ice bath and a 2.5 M solution of *n*-BuLi in hexanes (0.24 mL, 0.61 mmol) was added dropwise. The solution was then stirred at  $-78$  °C for 10 min and the reaction vessel was placed into a  $0$  °C ice bath and stirred at  $0$  °C for 5 min. *N*-BOC-Imidazole (185 mg, 1.1 mmol) in THF (2 mL) was added to the reaction vessel at  $0$  °C. The reaction mixture was allowed to warm to rt and stirred for 2 h. The reaction mixture was diluted with EtOAc (5 mL) and quenched with DI water (10 mL). The organic layer was separated and the aqueous solution was extracted with EtOAc (3 x 10 mL). The combined organic layer was washed with brine (10 mL), dried over  $\text{MgSO}_4$ , filtered, and the solvent was removed under reduced pressure to yield a colorless oil. The crude product was purified by flash column chromatography on silica gel (hexanes:EtOAc = 98:2) to afford the allylic carbonate as a colorless oil (205 mg, 71% yield).  $^1\text{H}$  NMR (500 MHz,  $\text{CDCl}_3$ )  $\delta$  7.33 – 7.29 (m, 4H), 7.27 – 7.22 (m, 1H), 6.54 (s, 1H), 5.49 (t,  $J = 7.0$  Hz, 1H), 2.35 – 2.21 (m, 2H), 1.90 (tt,



$J = 11.5$  Hz,  $3.0$  Hz,  $1\text{H}$ ),  $1.75 - 1.65$  (m,  $2\text{H}$ ),  $1.63 - 1.53$  (m,  $2\text{H}$ ),  $1.49$  (s,  $9\text{H}$ ),  $1.43 - 1.01$  (m,  $10\text{H}$ ),  $0.91$  (t,  $J = 7.0$  Hz,  $3\text{H}$ );  $^{13}\text{C}\{^1\text{H}\}$  NMR ( $125$  MHz,  $\text{CDCl}_3$ )  $\delta$   $153.3$ ,  $142.5$ ,  $139.5$ ,  $129.5$ ,  $128.3$ ,  $127.4$ ,  $126.2$ ,  $82.0$ ,  $76.7$ ,  $39.6$ ,  $35.0$ ,  $34.6$ ,  $32.4$ ,  $28.1$ ,  $27.9$ ,  $27.2$  (two overlapping resonances),  $26.5$ ,  $22.6$ ,  $14.3$ ; IR (neat)  $2956$ ,  $2927$ ,  $2853$ ,  $1742$ ,  $1496$ ,  $1449$ ,  $1393$ ,  $1369$ ,  $1279$ ,  $1254$ ,  $1163$ ,  $1086$ ,  $\text{cm}^{-1}$ ; HRMS  $m/z$   $359.2567$  [ $(\text{M}+\text{Na})^+$ ; calcd for  $\text{C}_{24}\text{H}_{36}\text{O}_3\text{Na}$ :  $359.2562$ ].

### Preparation of allylic acetate **1m**.

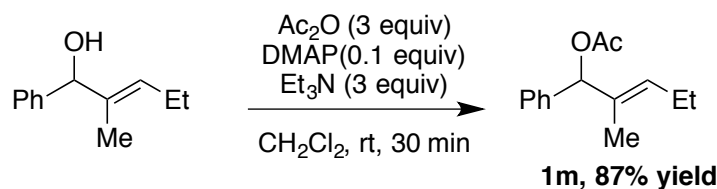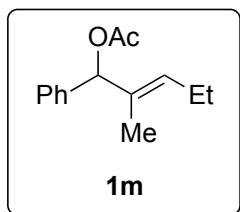

**(E)-2-Methyl-1-phenylpent-2-en-1-yl acetate (1m).** To a  $20$  mL glass vial equipped with a stir bar was added (*E*)-2-methyl-1-phenylpent-2-en-1-ol<sup>6</sup> ( $550$  mg,  $3.12$  mmol) and  $\text{CH}_2\text{Cl}_2$  ( $6$  mL). DMAP ( $38$  mg,  $0.31$  mmol) and  $\text{Et}_3\text{N}$  ( $1.3$  mL,  $9.36$  mmol) were added to the solution and the vial was sealed with a screw cap.

The reaction mixture was stirred at rt for  $5$  min. To the reaction mixture was added acetic anhydride ( $0.88$  mL,  $9.36$  mmol) and the resulting solution was stirred at rt for  $30$  min. The reaction mixture was then diluted with  $\text{CH}_2\text{Cl}_2$  ( $5$  mL) and quenched with DI water ( $10$  mL). The organic layer was separated and the aqueous solution was extracted with  $\text{CH}_2\text{Cl}_2$  ( $2 \times 20$  mL). The combined organic layer was dried over  $\text{MgSO}_4$ , filtered, and the solvent was removed under reduced pressure to yield a colorless oil. The crude product was purified by flash column chromatography on silica gel (hexanes:EtOAc =  $97:3$ ) to afford the allylic acetate as a colorless oil ( $126$  mg,  $91\%$  yield).  $^1\text{H}$  NMR ( $500$  MHz,  $\text{CDCl}_3$ )  $\delta$   $7.35 - 7.24$  (m,  $5\text{H}$ ),  $6.18$  (s,  $1\text{H}$ ),  $5.59$  (t,  $J = 7.5$  Hz,  $1\text{H}$ ),  $2.13$  (s,  $3\text{H}$ ),  $2.06$  (dq,  $J = 7.5$  Hz,  $7.0$  Hz,  $2\text{H}$ ),  $1.51$  (s,  $3\text{H}$ ),  $0.99$  (t,  $J = 7.5$  Hz,  $3\text{H}$ );  $^{13}\text{C}\{^1\text{H}\}$  NMR ( $125$  MHz,  $\text{CDCl}_3$ )  $\delta$   $170.2$ ,  $139.4$ ,  $132.6$ ,  $130.7$ ,  $128.4$ ,

127.8, 126.8, 80.2, 21.5, 21.2, 14.1, 12.6; IR (neat) 2965, 2934, 2874, 1742, 1495, 1454, 1370, 1235, 1021  $\text{cm}^{-1}$ ; HRMS  $m/z$  241.1205 [(M+Na)<sup>+</sup>; calcd for C<sub>14</sub>H<sub>18</sub>O<sub>2</sub>Na: 241.1204].

### 3. Palladium Catalyzed Allylic Substitution of Allylic Acetates

**General Procedure B<sup>3</sup>: Palladium Catalyzed Allylic Substitution of 2-B(pin)-Substituted Allylic Acetates with NaCH(CO<sub>2</sub>Me)<sub>2</sub>.** To a Schlenk flask equipped with a stir bar was added [Pd(allyl)Cl]<sub>2</sub> (1.8 mg, 0.005 mmol, 5 mol %) and PPh<sub>3</sub> (5.3 mg, 0.02 mmol, 20 mol %) in 0.5 mL of dry and degassed THF at rt under N<sub>2</sub> and the solution stirred at rt for 30 min. To this catalyst solution was added 2-B(pin)-substituted allylic acetate (0.10 mmol) and the reaction mixture stirred for an additional 30 – 45 min. In a separate 5 mL round bottomed flask equipped with a stir bar and condenser was added sodium hydride (7.9 mg, 0.33 mmol) in 2.0 mL of dry and degassed THF under N<sub>2</sub>, and the reaction mixture cooled to 0 °C in an ice bath. To this white suspension was added dropwise dimethyl malonate (35  $\mu\text{L}$ , 39.6 mg, 0.3 mmol) at 0 °C, which was accompanied by rapid evolution of H<sub>2</sub>. The reaction soon became clear, after which it was heated to reflux under N<sub>2</sub> for 15 min. The dimethyl malonate sodium solution (3 equiv) was cooled to rt, and then cannulated into the Schlenk flask containing the catalyst and 2-B(pin)-substituted allylic acetate solution at rt. The reaction mixture was warmed to 40 °C and stirred until TLC showed complete consumption of the 2-B(pin) substituted allylic acetate. The reaction mixture was then cooled to rt, diluted with EtOAc (4 mL) and quenched with saturated NH<sub>4</sub>Cl (4 mL). The organic layer was separated and the aqueous solution was extracted with EtOAc (3 x 5 mL). The combined organic solution was dried over MgSO<sub>4</sub>, filtered through celite and the solvent was removed under reduced pressure to yield a pale red oil. The crude product was dissolved in CDCl<sub>3</sub> and the ratio of regioisomers was determined by <sup>1</sup>H NMR spectroscopy of unpurified reaction mixtures. CDCl<sub>3</sub> was removed under reduced pressure and the crude product was purified by flash column chromatography on silica gel. The vinyl boronate ester is susceptible to oxidation of the B–C bond on silica under air, and hence a rapid purification is necessary to minimize oxidation to the corresponding ketone.

**General Procedure C<sup>3</sup>: Palladium Catalyzed Allylic Substitution of 2-B(pin)-Substituted Allylic Acetates with BSA, CH<sub>2</sub>(CO<sub>2</sub>Me)<sub>2</sub> and catalytic KOAc.** To a Schlenk flask equipped with a stir bar was added Pd(OAc)<sub>2</sub> (2.2 mg, 0.01 mmol, 10 mol %) and PPh<sub>3</sub> (5.3 mg, 0.02 mmol, 20 mol %) in 1.0 mL of dry and degassed THF at rt under N<sub>2</sub> and the solution stirred at rt for 30 min. To this catalyst solution was added 2-B(pin)-substituted allylic acetate (0.10 mmol) and the reaction mixture stirred for an additional 15 min, after which *N,O*-bis(trimethylsilyl)acetamide (BSA) (73 μL, 61.0 mg, 0.30 mmol, 3 equiv) and dimethylmalonate (34 μL, 39.6 mg, 0.3 mmol, 3 equiv) were added at rt followed by catalytic KOAc. The reaction mixture was warmed to 40 °C and stirred until TLC showed complete consumption of the 2-B(pin) substituted allylic acetate, typically 10 – 12 h. The reaction mixture was then cooled to rt, diluted with EtOAc (4 mL) and filtered through a plug of silica and the solvent was removed under reduced pressure. The crude product was dissolved in CDCl<sub>3</sub> and the ratio of regioisomers was determined by <sup>1</sup>H NMR spectroscopy of unpurified reaction mixtures. CDCl<sub>3</sub> was removed under reduced pressure and the crude product was purified by flash column chromatography on silica gel.

**Preparation of Pd/2 equiv PPh<sub>3</sub> stock solution (0.143 M of Pd) in THF.**

To an oven-dried microwave vial equipped with a stir bar was charged with [Pd(allyl)Cl]<sub>2</sub> (9.1 mg, 0.025 mmol) or Pd(OAc)<sub>2</sub> (11.2 mg, 0.05 mmol) and PPh<sub>3</sub> (26.2 mg, 0.10 mmol) and the vial was capped, and then the vial was purged with N<sub>2</sub>. To the vial was added 3.5 mL of dry and degassed THF and the stock solution was stirred at rt for 30 min before use.

### **Preparation of NaCH(CO<sub>2</sub>Me)<sub>2</sub> stock solution (0.1M) in THF.**

To an oven-dried microwave vial equipped with a stir bar was charged with NaH (48 mg, 2.0 mmol) and the vial was capped, and then the vial was purged with N<sub>2</sub>. To the vial was added dry and degassed THF (1.77 mL) at rt and the reaction mixture cooled to 0 °C in an ice bath. To this white suspension was added dropwise dimethyl malonate (229  $\mu$ L, 264 mg, 2.0 mmol). Upon addition of the dimethyl malonate, rapid evolution of a gas, presumably H<sub>2</sub>, was observed. Once the H<sub>2</sub> evolution ceased, the resulting solution was heated to reflux for 1 min. The stock solution was cooled and stirred at rt for 10 min before use.

**General Procedure D: Palladium Catalyzed Allylic Substitution of 2-B(pin)-Substituted Allylic Acetates or 2-Substituted Allylic Acetates with NaCH(CO<sub>2</sub>Me)<sub>2</sub>.** To an oven-dried microwave vial equipped with a stir bar was charged with the allylic acetate **1e** (63.2 mg, 0.20 mmol) and the vial was capped and purged with N<sub>2</sub>. To the vial was added a stock solution of [Pd(allyl)Cl]<sub>2</sub>/2 equiv PPh<sub>3</sub> in 0.143 M THF (1.4 mL, 10 mol% Pd and 20 mol % PPh<sub>3</sub>) by a syringe and the reaction mixture was stirred at rt for 30 min, after which a stock solution of NaCH(CO<sub>2</sub>Me)<sub>2</sub> in 0.1 M THF (0.6 mL, 0.6 mmol) was added by a syringe at rt. The sealed vial was warmed to 40 °C and stirred until TLC taken under positive pressure of nitrogen showed complete consumption of allylic acetate, typically 0.5 – 24 h. Note that aliquots for TLC were taken under positive pressure of nitrogen. The reaction mixture was cooled to rt, diluted with EtOAc (2 mL) and then quenched with three drops of water. The solution was filtered through a plug of MgSO<sub>4</sub> and celite. The pad was rinsed with additional ethyl acetate (5 mL) and the solvent was removed under reduced pressure to yield a pale red or yellow oil. The crude product was dissolved in CDCl<sub>3</sub> and the ratio of regioisomers and the ratio of 1,4-elimination products were determined by <sup>1</sup>H NMR spectroscopy of unpurified reaction mixtures. CDCl<sub>3</sub> was removed under reduced pressure and the crude product was purified by flash column chromatography on silica gel

(hexanes:EtOAc = 95:5) to afford the mixture of dimethyl malonate substituted products and the mixture of 1,4-elimination products. The vinyl boronate ester is susceptible to oxidation of the B–C bond on silica under air, and hence a rapid purification is necessary to minimize oxidation to the corresponding ketone.

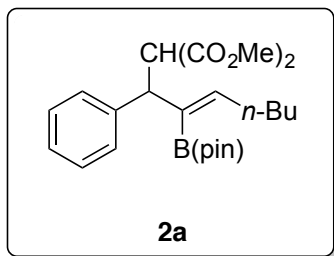

**Dimethyl (E)-2-(1-phenyl-2-(4,4,5,5-tetramethyl-1,3,2-dioxaborolan-2-yl)hept-2-en-1-yl)malonate (2a).** The compound was prepared by General Procedure B using **1a** and the result was reported in our previous communication (>90:10, 76% yield).<sup>3</sup>

The title compound can also be prepared by General Procedure B using **1d** and the result was reported in our previous communication (>90:10, 51% yield).<sup>3</sup>

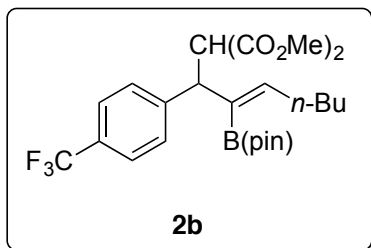

**Dimethyl (E)-2-(2-(4,4,5,5-tetramethyl-1,3,2-dioxaborolan-2-yl)-1-(4-(trifluoromethyl)phenyl)hept-2-en-1-yl)malonate (2b).** The compound was prepared by General Procedure C using **1b** and the result was reported in our previous communication (>95:5, 92% yield).<sup>3</sup>

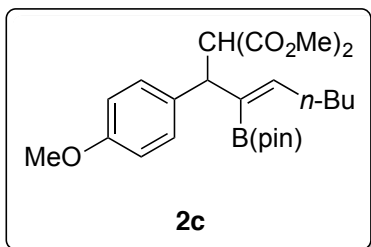

**Dimethyl (E)-2-(1-(4-methoxyphenyl)-2-(4,4,5,5-tetramethyl-1,3,2-dioxaborolan-2-yl)hept-2-en-1-yl)malonate (2c).** The compound was prepared by General Procedure C using **1c** and the result was reported in our previous communication (>95:5, 80% yield).<sup>3</sup>

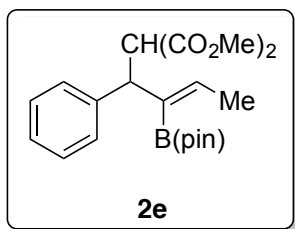

**Dimethyl (E)-2-(1-phenyl-2-(4,4,5,5-tetramethyl-1,3,2-dioxaborolan-2-yl)but-2-en-1-yl)malonate (2e).** The product was prepared by General Procedure D using (E)-1-phenyl-2-(4,4,5,5-tetramethyl-1,3,2-dioxaborolan-2-yl)but-2-en-1-yl acetate **1e** (63.2 mg, 0.2 mmol), a 0.143 M

[Pd(allyl)Cl]<sub>2</sub>/2PPh<sub>3</sub> from a stock solution (1.4 mL), and 0.1 M NaCH(CO<sub>2</sub>Me)<sub>2</sub> stock solution (0.6 mL). The reaction mixture was stirred at 40 °C for 3 h. The regioisomer **2e** (benzylic substitution product) was confirmed by <sup>1</sup>H NMR spectra of unpurified reaction products. The crude product was purified by flash column chromatography on silica gel (hexanes:EtOAc = 95:5) to afford dimethyl malonate substituted vinyl boronate ester as an oil (54.4 mg, 70% yield). <sup>1</sup>H NMR (500 MHz, CDCl<sub>3</sub>) δ 7.27 – 7.23 (m, 2H), 7.22 – 7.17 (m, 2H), 7.14 – 7.09 (m, 1H), 6.32 (q, *J* = 7.0 Hz, 1H), 4.44 (d, *J* = 12.0 Hz, 1H), 4.20 (d, *J* = 12.0 Hz, 1H), 3.69 (s, 3H), 3.48 (s, 3H), 1.88 (d, *J* = 7.0 Hz, 3H), 1.16 (s, 6H), 1.14 (s, 6H); <sup>13</sup>C{<sup>1</sup>H} NMR (125 MHz, CDCl<sub>3</sub>) δ 169.1, 169.0, 142.4, 141.8, 128.4, 128.2, 126.5, 83.2, 55.9, 53.0, 52.4 (two overlapping resonances), 25.0, 24.9, 17.5 (the quaternary vinyl C bearing the boron group is not observed); <sup>11</sup>B NMR (CDCl<sub>3</sub>, 125 MHz) δ 29.2; IR (neat) 2979, 2953, 1761, 1740, 1625, 1496, 1434, 1408, 1373, 1310, 1267, 1194, 1140, 1027 cm<sup>-1</sup>; HRMS *m/z* 411.1967 [(M+Na)<sup>+</sup>; calcd for C<sub>21</sub>H<sub>29</sub>BO<sub>6</sub>Na: 411.1955].

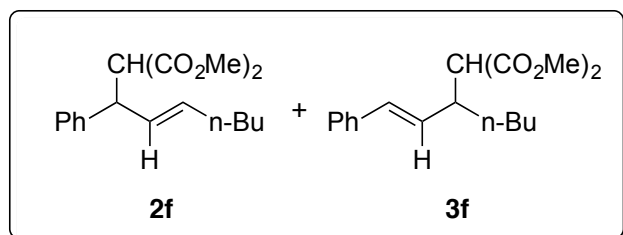

**Dimethyl (E)-2-(1-phenylhept-2-en-1-yl)malonate (2f, minor) and Dimethyl (E)-2-(1-phenylhept-1-en-3-yl)malonate (3f, major).** The reaction was performed following General Procedure D with **1g**

(23.2 mg, 0.1 mmol) in the presence of 5 mol % of [Pd(allyl)Cl]<sub>2</sub> and 20 mol% of PPh<sub>3</sub> of the stock solution and 3 equiv of NaCH(CO<sub>2</sub>Me)<sub>2</sub> from a stock solution. The reaction mixture was stirred at 40 °C for 30 min. The ratio of regioisomers was **2f:3f** = 13:87 determined by <sup>1</sup>H NMR spectra of unpurified

reaction products. The crude product was purified by flash column chromatography on silica gel (hexanes:EtOAc = 90:10) to afford the mixture of dimethyl malonate substituted products as a colorless oil (26.5 mg, 87% yield). The NMR spectral data match the previously published data.<sup>3</sup>

The title compound can also be made by General Procedure D with **1g** at rt for 30 min to afford the mixture of products **2f** and **3f** (16:84, 25.3 mg, 83% yield).

The title compound can also be made by General Procedure B using **1f** in the presence of 5 mol % of Pd(OAc)<sub>2</sub> and 10 mol % of PPh<sub>3</sub> at 40 °C for 12 h and the result was reported in our previous communication (**2f:3f**=10:90, 85% yield).<sup>3</sup>

The title compound can also be made by General Procedure B using **1g** in the presence of 5 mol % of Pd(OAc)<sub>2</sub> and 10 mol % of PPh<sub>3</sub>. (**2f:3f**=9:91, 95% yield).<sup>3</sup>

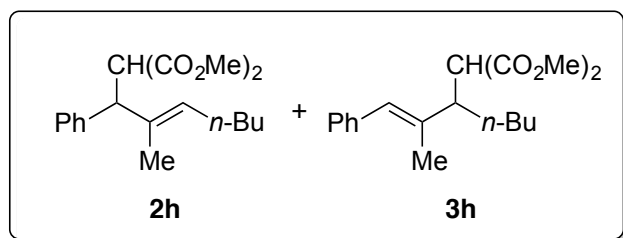

**Dimethyl (E)-2-(2-methyl-1-phenylhept-2-en-1-yl)malonate (2h, major) and dimethyl (E)-2-(2-methyl-1-phenylhept-1-en-3-yl)malonate (3h, minor).** The reaction was performed following

General Procedure D with **1h** (24.6 mg, 0.1 mmol) in the presence of 5 mol % of [Pd(allyl)Cl]<sub>2</sub> and 20 mol % of PPh<sub>3</sub> of the stock solution and 3 equiv of NaCH(CO<sub>2</sub>Me)<sub>2</sub> from a stock solution. The reaction mixture was stirred at 40 °C for 3 h. The ratio of regioisomers was **2h:3h** = 63:37 determined by <sup>1</sup>H NMR spectra of unpurified reaction products. The crude product was purified by flash column chromatography on silica gel (hexanes:EtOAc = 95:5) to afford the mixture of dimethyl malonate substituted products as a colorless oil (28.0 mg, 88% yield) and characterized as the mixture of regioisomers. The reaction of **1h** provided the mixture of **2h** and **3h** (79%, 63:37) at 40 °C for 24 h, and **2h** and **3h** (65%, 64:36) at 70 °C for 24 h. **Dimethyl (E)-2-(2-methyl-1-phenylhept-2-en-1-yl)malonate (2h)**. <sup>1</sup>H NMR (500 MHz, CDCl<sub>3</sub>) δ 7.35 – 7.10 (m, 5H), 5.42 (t, *J* = 7.5 Hz, 1H), 4.09 (d,

$J = 12.5$  Hz, 1H), 4.03 (d,  $J = 12.5$  Hz, 1H), 3.72 (s, 3H), 3.47 (s, 3H), 2.02 – 1.93 (dt,  $J = 7.5$  Hz, 7.0 Hz, 2H), 1.48 (s, 3H), 1.39 – 1.15 (m, 4H) 0.89 (t,  $J = 7.5$  Hz, 3H);  $^{13}\text{C}\{^1\text{H}\}$  NMR (125 MHz,  $\text{CDCl}_3$ )  $\delta$  168.7, 168.5, 140.1, 134.8, 128.5, 128.1, 127.1, 126.6, 55.8, 53.9, 52.7, 52.6, 32.0, 27.8, 22.5, 15.1, 14.2; **Dimethyl (*E*)-2-(2-methyl-1-phenylhept-1-en-3-yl)malonate (3h)**.  $^1\text{H}$  NMR (500 MHz,  $\text{CDCl}_3$ )  $\delta$  7.34 – 7.28 (m, 2H), 7.22 – 7.16 (m, 3H), 6.39 (s, 1H), 3.77 (s, 3H), 3.64 (s, 3H), 3.54 (d,  $J = 11.0$  Hz, 1H), 2.97 (ddd,  $J = 11.0$  Hz, 8.5 Hz, 6.5 Hz, 1H), 1.77 (s, 3H), 1.52 – 1.42 (m, 2H), 1.40 – 1.15 (m, 4H), 0.88 (t,  $J = 7.0$  Hz, 3H);  $^{13}\text{C}\{^1\text{H}\}$  NMR (125 MHz,  $\text{CDCl}_3$ )  $\delta$  169.1, 168.8, 138.0, 136.7, 129.5, 129.1, 128.3, 126.5, 56.7, 52.73, 52.61, 49.8, 30.4, 29.5, 22.7, 14.2, 13.9; **(2h+3h)** IR (neat) 2954, 2929, 2858, 1762, 1740, 1600, 1494, 1453, 1434, 1316, 1265, 1243, 1160, 1143, 1130 $\text{cm}^{-1}$ ; **(2h+3h)** HRMS  $m/z$  341.1730 [ $(\text{M}+\text{Na})^+$ ; calcd for  $\text{C}_{19}\text{H}_{26}\text{O}_4\text{Na}$ : 341.1729].

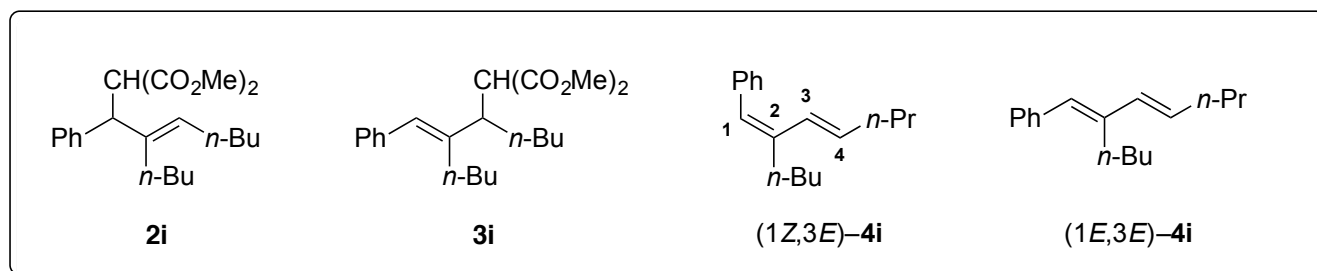

**Dimethyl (*E*)-2-(2-butyl-1-phenylhept-2-en-1-yl)malonate (2i, major of 2i+3i), dimethyl (*E*)-2-(6-benzylidenedecan-5-yl)malonate (3i, minor of 2i+3i), ((1*Z*,3*E*)-2-butylhepta-1,3-dien-1-yl)benzene ((1*Z*,3*E*)-4i, minor of 4i) and ((1*E*,3*E*)-2-butylhepta-1,3-dien-1-yl)benzene ((1*E*,3*E*)-4i, major of 4i).**

The reaction was performed following General Procedure D with **1i** (28.8 mg, 0.1 mmol) in the presence of 5 mol % of  $[\text{Pd}(\text{allyl})\text{Cl}]_2$  and 20 mol% of  $\text{PPh}_3$  of the stock solution and 3 equiv of  $\text{NaCH}(\text{CO}_2\text{Me})_2$  stock solution. The reaction mixture was stirred at 40 °C for 8 h. The ratio of isomers was **2i:3i** = 81:19 and **(1Z,3E)-4i:(1E,3E)-4i** = 24:76 determined by  $^1\text{H}$  NMR spectra of unpurified reaction products. The crude product was purified by flash column chromatography on silica gel (hexanes:EtOAc = 95:5) to



afford the mixture of dimethyl malonate substituted products as a colorless oil (27.0 mg, 75% yield) and the mixture of 1,4-elimination products as a colorless oil (4.3 mg, 15% yield).

The title compound can also be made at 70 °C for 8 h to afford the mixture of products **2i:3i** (81:19, 7.2 mg, 20% yield) and **(1Z,3E)-4i:(1E,3E)-4i** (27:73, 15.3 mg, 67% yield).

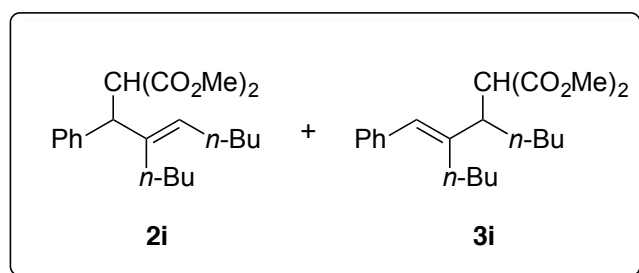

**Dimethyl (E)-2-(2-butyl-1-phenylhept-2-en-1-yl)malonate (2i).** <sup>1</sup>H NMR (500 MHz, CDCl<sub>3</sub>) δ

7.35 – 7.15 (m, 5H), 4.04 (d, *J*<sub>AB</sub> = 12.0 Hz, 1H), 5.36 (t, *J* = 7.5 Hz, 1H), 4.02 (d, *J*<sub>AB</sub> = 12.0 Hz,

1H), 3.71 (s, 3H), 3.41 (s, 3H), 2.12 – 2.04 (m, 1H), 2.06 – 1.98 (m, 2H), 1.67 – 1.58 (m, 1H) 1.55 – 1.10 (m, 8H), 0.90 (t, *J* = 7.0 Hz, 3H), 0.83 (t, *J* = 7.0 Hz, 3H); <sup>13</sup>C{<sup>1</sup>H} NMR (125 MHz, CDCl<sub>3</sub>) δ 168.7, 168.5, 140.2, 139.6, 128.6, 128.4, 127.2, 125.2, 57.0, 52.6, 52.5, 51.2, 32.2, 30.7, 30.6, 27.7, 23.0, 22.5, 14.2, 14.1; **Dimethyl (E)-2-(6-benzylidenedecan-5-yl)malonate (3i).** <sup>1</sup>H NMR (500 MHz, CDCl<sub>3</sub>) δ 7.35 – 7.15 (m, 5H), 6.31 (s, 1H), 3.76 (s, 3H), 3.66 (s, 3H), 3.63 (d, *J* = 10.5 Hz, 1H), 2.98 (ddd, *J* = 10.5 Hz, 9.0 Hz, 4.5 Hz, 1H), 2.24 – 2.12 (m, 2H), 1.57 – 1.10 (m, 10H), 0.94 – 0.80 (m, 6H); <sup>13</sup>C{<sup>1</sup>H} NMR (125 MHz, CDCl<sub>3</sub>) δ 169.3, 168.9, 142.3, 138.2, 128.7, 128.3, 128.2, 126.5, 57.0, 52.7, 52.6, 49.9, 31.7, 31.0, 30.7, 29.3, 23.4, 22.9, 14.2, 14.0; **(2i+3i)** IR (neat) 2955, 2931, 2860, 1763, 1741, 1600, 1494, 1454, 1434, 1378, 1315, 1274, 1245, 1193, 1159, 1141, 1030 cm<sup>-1</sup>; **(2i+3i)** HRMS *m/z* 383.2202 [M+Na]<sup>+</sup>; calcd for C<sub>22</sub>H<sub>32</sub>O<sub>4</sub>Na: 383.2198].

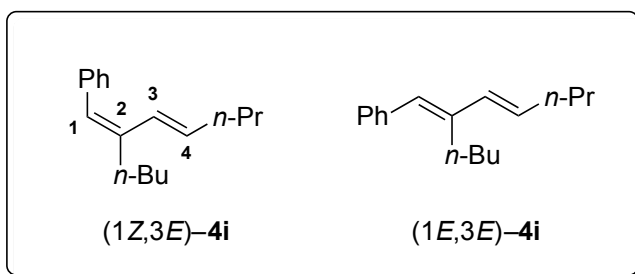

**((1Z,3E)-2-Butylhepta-1,3-dien-1-yl)benzene**

**((1Z,3E)-4i).**  $^1\text{H}$  NMR (500 MHz,  $\text{CDCl}_3$ )  $\delta$  7.35 – 7.29 (m, 2H), 7.27 – 7.23 (m, 2H), 7.22 – 7.17 (m, 1H), 6.47 (d,  $J = 16.0$  Hz, 1H), 6.32 (s, 1H), 5.86

(dt,  $J = 16.0$  Hz, 7.0 Hz, 1H), 2.34 (t,  $J = 7.5$  Hz, 2H), 2.09 (dt,  $J = 7.5$  Hz, 7.0 Hz, 2H), 1.58 – 1.34 (m, 6H), 0.96 – 0.87 (m, 6H);  $^{13}\text{C}\{^1\text{H}\}$  NMR (125 MHz,  $\text{CDCl}_3$ )  $\delta$  139.4, 138.4, 132.4, 128.9, 128.2, 127.8, 126.9, 126.3, 35.6, 34.7, 31.5, 23.0, 22.9, 14.3, 14.0; **((1E,3E)-2-Butylhepta-1,3-dien-1-yl)benzene**

**((1E,3E)-4i).**  $^1\text{H}$  NMR (500 MHz,  $\text{CDCl}_3$ )  $\delta$  7.35 – 7.29 (m, 2H), 7.27 – 7.23 (m, 2H), 7.22 – 7.17 (m, 1H), 6.37 (s, 1H), 6.11 (d,  $J = 15.5$  Hz, 1H), 5.79 (dt,  $J = 15.5$  Hz, 7.0 Hz, 1H), 2.45 – 2.38 (m, 2H), 2.14 (dt,  $J = 7.5$  Hz, 7.0 Hz, 2H), 1.58 – 1.34 (m, 6H), 0.94 (t,  $J = 7.5$  Hz, 3H), 0.92 (t,  $J = 7.5$  Hz, 3H);

$^{13}\text{C}\{^1\text{H}\}$  NMR (125 MHz,  $\text{CDCl}_3$ )  $\delta$  141.2, 138.4, 134.4, 130.2, 129.6, 128.9, 128.4, 126.5, 35.4, 31.7, 27.6, 23.3, 23.0, 14.2, 14.0; **(1Z,3E)-4i** and **(1Z,3E)-4i** IR (neat) 2958, 2931, 2861, 1739, 1636, 1372, 1306, 1240, 1145  $\text{cm}^{-1}$ ; **(1Z,3E)-4i** and **(1Z,3E)-4i** HRMS-CI  $m/z$  228.1884 [(M) $^+$ ; calcd for  $\text{C}_{17}\text{H}_{24}$ : 228.1878].

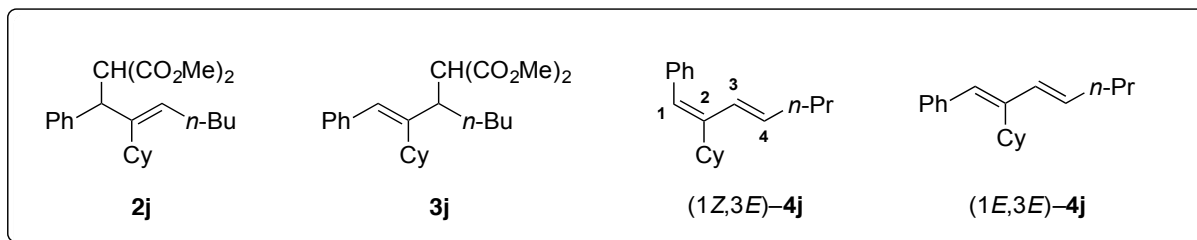

**Dimethyl (E)-2-(2-cyclohexyl-1-phenylhept-2-en-1-yl)malonate (2j, major of 2j+3j), dimethyl (E)-2-(2-cyclohexyl-1-phenylhept-1-en-3-yl)malonate (3j, minor), (1Z,3E)-2-cyclohexylhepta-1,3-dien-1-yl)benzene ((1Z,3E)-4j, major of 4j) and (1E,3E)-2-cyclohexylhepta-1,3-dien-1-yl)benzene ((1E,3E)-4j, minor of 4j)**

The reaction was performed following General Procedure D with **1j** (31.4 mg, 0.1 mmol) in the presence of 5 mol % of [Pd(allyl)Cl]<sub>2</sub> and 20 mol% of PPh<sub>3</sub> of the stock solution and 3 equiv of NaCH(CO<sub>2</sub>Me)<sub>2</sub> stock solution. The reaction mixture was stirred at 40 °C for 24 h. The ratio of regioisomers was **2j:3j** = 84:16 and **(1Z,3E)-4j:(1E,3E)-4j** = 85:15 determined by <sup>1</sup>H NMR spectra of unpurified reaction products. The crude product was purified by flash column chromatography on silica gel (hexanes:EtOAc = 95:5) to afford the mixture of dimethyl malonate substituted products as a colorless oil (23.6 mg, 61% yield) and the mixture of 1,4-elimination products as a colorless oil (5.6 mg, 22% yield).

The title compound can also be made in the presence of 10 mol % of Pd(OAc)<sub>2</sub> instead of 5 mol % of [Pd(allyl)Cl]<sub>2</sub> at 40 °C for 24 h to afford the mixture of products **2j** and **3j** (86:14, 26.3 mg, 68% yield).

The title compound can also be made at 70 °C to afford the mixture of products **2j** and **3j** (5.8 mg, 15% yield) and 1,4-elimination products (**(1Z,3E)-4j** : **(1E,3E)-4j** (86:14, 17.8 mg, 70% yield).

Allylic acetate **1k** (31.4 mg, 0.1 mmol) did not afford allylic substitution products in the presence of 5 mol % of [Pd(allyl)Cl]<sub>2</sub> and 20 mol% of PPh<sub>3</sub> of the stock solution and 3 equiv of NaCH(CO<sub>2</sub>Me)<sub>2</sub> stock solution. The reaction mixture was stirred at 40 °C for 24 h.

The title compound can also be made from **1l** instead of **1j** at 40 °C to afford the mixture of products **2j** and **3j** (83:17, 1.9 mg, 5% yield).

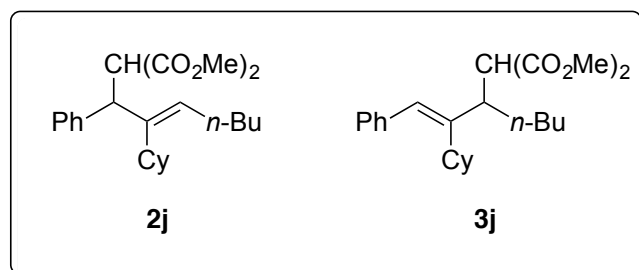

**Dimethyl (E)-2-(2-cyclohexyl-1-phenylhept-2-en-1-yl)malonate (2j).** <sup>1</sup>H NMR (500 MHz, CDCl<sub>3</sub>) δ 7.35 – 7.06 (m 5H), 5.36 (t, *J* = 6.0 Hz, 1H), 4.18 (d, *J* = 12.5 Hz, 1H), 3.92 (d, *J* = 12.5

Hz, 1H), 3.69 (s, 3H), 3.41 (s, 3H), 2.36 (tt, *J* = 12.0 Hz, 3.5 Hz, 1H), 2.15 – 2.05 (m, 2H), 1.80 – 1.10 (m, 14H), 0.92 (t, *J* = 7.0 Hz, 1H); <sup>13</sup>C{<sup>1</sup>H} NMR (125 MHz, CDCl<sub>3</sub>) δ 168.9, 168.4, 143.3, 141.0,

128.9, 128.3, 127.0, 125.7, 58.8, 52.6, 52.5, 48.0, 41.7, 32.5, 31.8, 31.6, 27.4, 27.2, 27.0, 26.3, 22.6, 14.3; **Dimethyl (*E*)-2-(2-cyclohexyl-1-phenylhept-1-en-3-yl)malonate (3j)**. While the resonances in the  $^1\text{H}$  spectrum for the major regioisomer overlap with most of those for the minor regioisomer, some of the resolved resonances for the minor regioisomer are  $^1\text{H}$  NMR (500 MHz,  $\text{CDCl}_3$ )  $\delta$  7.35 – 7.06 (m, 5H), 6.28 (s, 1H), 3.10 (dt,  $J = 8.0$  Hz, 4.5 Hz, 1H), 2.67 (tt,  $J = 12.0$  Hz, 3.0 Hz, 1H); **2j + 3j** IR (neat) 2928, 2853, 1763, 1743, 1494, 1450, 1434, 1277, 1246, 1194, 1139, 1030  $\text{cm}^{-1}$ ; **2j + 3j** HRMS  $m/z$  409.2375 [(M+Na) $^+$ ]; calcd for  $\text{C}_{24}\text{H}_{34}\text{O}_4\text{Na}$ : 409.2355].

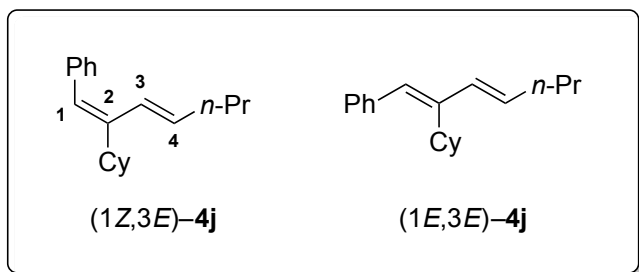

**(1Z,3E)-2-Cyclohexylhepta-1,3-dien-1-yl)benzene**

**((1Z,3E)-4j):**  $^1\text{H}$  NMR (500 MHz,  $\text{CDCl}_3$ )  $\delta$  7.33 – 7.28 (m, 2H), 7.27 – 7.23 (m, 2H), 7.21 – 7.16 (m, 1H), 6.42 (d,  $J = 15.5$  Hz, 1H), 6.30 (s, 1H), 5.72

(dt,  $J = 15.5$  Hz, 7.0 Hz, 1H), 2.38 (tt,  $J = 11.5$  Hz, 3.0 Hz, 1H), 2.12– 2.05 (m, 2H), 1.93 – 1.86 (m, 2H), 1.86 – 1.78 (m, 2H), 1.70 – 1.15 (m, 8H), 0.90 (t,  $J = 7.0$  Hz, 3H) ;  $^{13}\text{C}\{^1\text{H}\}$  NMR (125 MHz,  $\text{CDCl}_3$ )  $\delta$  144.6, 138.7, 131.1, 129.7, 128.1, 128.0, 126.2, 124.4, 41.3, 35.6, 33.6 (two overlapping resonances), 27.4 (two overlapping resonances), 26.8, 22.9, 14.0; **(1E,3E)-2-Cyclohexylhepta-1,3-dien-1-yl)benzene ((1E,3E)-4j):**  $^1\text{H}$  NMR (500 MHz,  $\text{CDCl}_3$ )  $\delta$  7.4 – 7.15 (m, 5H), 6.49 (s, 1H), 5.94 (dt,  $J = 15.5$  Hz, 7.0 Hz, 1H) 2.74 (tt,  $J = 12.0$  Hz, 3.5 Hz, 1H), 2.16 – 2.05 (m, 2H), 1.78 – 1.70 (m, 2H), 1.70 – 1.11 (m, 10H), 0.94 (t,  $J = 7.0$  Hz, 3H);  $^{13}\text{C}\{^1\text{H}\}$  NMR (125 MHz,  $\text{CDCl}_3$ )  $\delta$  146.2, 138.6, 131.6, 130.4, 129.1, 128.3, 126.3, 123.9, 39.4, 35.5, 33.6, 31.9, 27.4, 26.6, 26.4, 22.9, 14.0. **(1Z,3E)-4j+(1E,3E)-4j** IR (neat) 3022, 2956, 2927, 2853, 1599, 1493, 1448, 1378, 1073, 962  $\text{cm}^{-1}$ ; **(1Z,3E)-4j+(1E,3E)-4j** HRMS-CI  $m/z$  254.2012 [(M) $^+$ ]; calcd for  $\text{C}_{19}\text{H}_{26}$ : 254.2035].

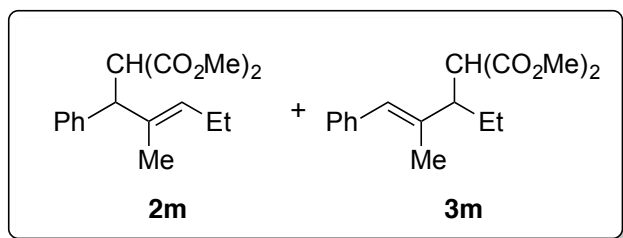

**Dimethyl (E)-2-(2-methyl-1-phenylpent-2-en-1-yl)malonate (2m, major) and dimethyl (E)-2-(2-methyl-1-phenylpent-1-en-3-yl)malonate (3m, minor):** The reaction was performed following

General Procedure D with **1m** (21.8 mg, 0.1 mmol) in the presence of 10 mol % of Pd(OAc)<sub>2</sub> and 20 mol% of PPh<sub>3</sub> of the stock solution and 3 equiv of NaCH(CO<sub>2</sub>Me)<sub>2</sub> stock solution. The reaction mixture was stirred at 40 °C for 4 h. The ratio of regioisomers was **2m:3m** = 53:47 determined by <sup>1</sup>H NMR spectra of unpurified reaction products. The crude product was purified by flash column chromatography on silica gel (hexanes:EtOAc = 95:5) to afford the mixture of dimethyl malonate substituted products (**2m+3m**) as a colorless oil (26.1 mg, 90% yield). **Dimethyl (E)-2-(2-methyl-1-phenylpent-2-en-1-yl)malonate (2m).** <sup>1</sup>H NMR (500 MHz, CDCl<sub>3</sub>) δ 7.33 – 7.17 (m, 5H), 5.43 (t, *J* = 7.0 Hz, 1H), 4.11 (d, *J*<sub>AB</sub> = 12.5 Hz, 1H), 4.00 (d, *J*<sub>AB</sub> = 12.5 Hz, 1H), 3.71 (s, 3H), 3.47 (s, 3H), 2.00 (dt, *J* = 7.5 Hz, 7.0 Hz, 2H), 1.48 (s, 3H), 0.94 (t, *J* = 7.5 Hz, 3H); <sup>13</sup>C{<sup>1</sup>H} NMR (125 MHz, CDCl<sub>3</sub>) δ 168.7, 168.5, 140.1, 134.4, 128.5, 128.2, 128.1, 127.1, 55.8, 54.0, 52.5 (two overlapping resonances), 21.4, 14.8, 14.3; **Dimethyl (E)-2-(2-methyl-1-phenylpent-1-en-3-yl)malonate (3m).** <sup>1</sup>H NMR (500 MHz, CDCl<sub>3</sub>) δ 7.34 – 7.28 (m, 2H), 7.23 – 7.13 (m, 3H), 6.39 (s, 1H), 3.76 (s, 3H), 3.64 (s, 3H), 3.55 (d, *J* = 11.0 Hz, 1H), 2.88 (ddd, *J* = 11.0, 11.0, 3.5 Hz, 1H), 1.77 (s, 3H), 1.60 – 1.51 (m, 1H), 1.50 – 1.39 (m, 1H), 0.88 (t, *J* = 7.5 Hz, 3H); <sup>13</sup>C{<sup>1</sup>H} NMR (125 MHz, CDCl<sub>3</sub>) δ 169.1, 168.7, 138.0, 136.4, 129.7, 129.1, 128.3, 126.5, 56.6, 52.74, 52.61, 51.5, 23.9, 14.0, 11.9; **2m+3m** IR (neat) 3027, 2958, 2934, 2874, 1760, 1739, 1600, 1494, 1453, 1435, 1319, 1261, 1241, 1193, 1161, 1144, 1031 cm<sup>-1</sup>; **2m+3m** HRMS *m/z* 291.1595 [(M+H)<sup>+</sup>; calcd for C<sub>17</sub>H<sub>23</sub>O<sub>4</sub>: 291.1596].

The title compound can also be made in the presence of 5 mol % of Pd(OAc)<sub>2</sub> instead of 5 mol % of [Pd(allyl)Cl]<sub>2</sub> at 40 °C for 24 h to afford the mixture of products **2m** and **3m** (53:47, 13.4 mg, 56% yield).

## 4. Computational Studies

All structures have been optimized in solvent using Jaguar v. 7.9<sup>7</sup> at the B3LYP-D3/lacvp\* level. B3LYP-D3 uses the hybrid B3LYP functional<sup>8-10</sup> augmented with dispersion corrections developed by Grimme and coworkers,<sup>11</sup> as implemented in Jaguar.<sup>7</sup> The lacvp\* basis set combines 6-31G\* for light elements with the Hay-Wadt ECP and basis set for Pd.<sup>12</sup> Continuum solvation used the PBF model<sup>13,14</sup> with parameters for THF.

Conformational preferences were checked for the  $\eta^3$ -(1-phenyl-3-ethyl-allyl)Pd(PPh<sub>3</sub>)<sub>2</sub> moiety, with different 2-substituents (H, Me, or B(pin)). In this framework, the ethyl group has two low energy conformations (open or closed, only the former allowing nucleophilic attack at the 3-position).

The effect of the 2-BPin-substituent on nucleophilic attack was tested with the smaller  $\eta^3$ -(1-phenyl-3-methyl-allyl)Pd(PPh<sub>3</sub>)<sub>2</sub> moiety, using NH<sub>3</sub> as a model nucleophile. The effect of continuum solvation on this transition state is significant.<sup>†</sup> Previous experience with very similar systems have shown that the barrier is very soft, with only a few kJ/mol variation over a range of more than 0.2 Å in the forming C–N bond. The low curvature makes transition state searches unreliable, especially with continuum solvent, but on the other hand, relaxed scans (constraining forming C–N bond, 2.0-2.5 Å in steps of 0.1 Å, full optimization of all remaining coordinates) gives reproducible structures with no hysteresis. For all calculated scans, the highest energy was found for a C–N distance of 2.2 Å; these are the structures reported herein.

### Conformations:

#### 2-unsubstituted, closed conformation

File: PhHEtAllylPd\_PPh3\_2\_closed\_thf.out

Solution phase energy: DFT(b3lyp-d3) -2626.22685903356 au

|     |               |               |               |
|-----|---------------|---------------|---------------|
| Pd1 | -1.6040910221 | 1.8916436118  | -0.0476526730 |
| P2  | -0.7342942743 | 0.6718064781  | -1.9161890484 |
| P3  | -0.6546857447 | 0.6584036515  | 1.8162833748  |
| C4  | -2.5326673803 | 3.9579073916  | 0.1263943049  |
| C5  | -2.9890546401 | 3.3026693605  | 1.2814574370  |
| C6  | -2.7835447266 | 3.4618333609  | -1.1727219691 |
| H7  | -3.8245538956 | 2.6099767162  | 1.1649490915  |
| H8  | -3.6803765545 | 2.8550272460  | -1.3244535371 |
| C10 | -3.8549397339 | -0.2312724800 | 5.0712178708  |
| C11 | -2.5752705044 | 0.1671060374  | 5.4671300969  |
| C12 | -1.5999601285 | 0.4703816496  | 4.5136381398  |

|     |               |               |               |
|-----|---------------|---------------|---------------|
| C13 | -1.8973337778 | 0.3865738531  | 3.1462059990  |
| C14 | -3.1927472504 | 0.0058456919  | 2.7549995052  |
| C15 | -4.1617456155 | -0.3109098498 | 3.7090485764  |
| H16 | -4.6091341934 | -0.4711490346 | 5.8171901045  |
| H17 | -2.3314101141 | 0.2457133711  | 6.5245420097  |
| H18 | -0.6148233423 | 0.7822697529  | 4.8457003304  |
| H19 | -3.4524801408 | -0.0367464080 | 1.6987177729  |
| H20 | -5.1571999367 | -0.6098245708 | 3.3873732225  |
| C21 | 2.9244413109  | 2.9861208858  | 3.6371085865  |
| C22 | 2.6810191050  | 1.6675979425  | 4.0352280079  |
| C23 | 1.6092797819  | 0.9583670287  | 3.4932703709  |
| C24 | 0.7593979156  | 1.5657216920  | 2.5516532504  |
| C25 | 1.0178745150  | 2.8846924182  | 2.1537785291  |
| C26 | 2.0935339433  | 3.5927283093  | 2.6926592884  |
| H27 | 3.7649165437  | 3.5346644880  | 4.0570934202  |
| H28 | 3.3313305716  | 1.1868844251  | 4.7629412029  |
| H29 | 1.4459906440  | -0.0737135956 | 3.7920414018  |
| H30 | 0.3795126067  | 3.3551677112  | 1.4114879409  |
| H31 | 2.2842357302  | 4.6145810407  | 2.3714257323  |
| C32 | 1.1366368912  | -3.5784626478 | 1.1098393306  |
| C33 | -0.1091635160 | -3.4502374732 | 1.7268820407  |
| C34 | -0.6514959392 | -2.1855770091 | 1.9611414609  |
| C35 | 0.0479794850  | -1.0301337153 | 1.5790745302  |
| C36 | 1.3061978634  | -1.1670015147 | 0.9698229023  |
| C37 | 1.8428832813  | -2.4325627564 | 0.7357487904  |
| H38 | 1.5577218501  | -4.5647577472 | 0.9264521892  |
| H39 | -0.6628723366 | -4.3359482742 | 2.0309562765  |
| H40 | -1.6188199798 | -2.1082318605 | 2.4475632060  |
| H41 | 1.8755820553  | -0.2886652937 | 0.6833705391  |
| H42 | 2.8167897974  | -2.5194170842 | 0.2600564478  |
| C43 | -2.2290231320 | -3.7176452279 | -2.2683348734 |
| C44 | -1.5022769103 | -3.1394869351 | -3.3153070125 |
| C45 | -1.0587638876 | -1.8207499745 | -3.2189335332 |
| C46 | -1.3235530665 | -1.0625248793 | -2.0621577943 |
| C47 | -2.0681751791 | -1.6450083428 | -1.0284456819 |
| C48 | -2.5160708885 | -2.9644207852 | -1.1287600978 |
| H49 | -2.5763199524 | -4.7453816849 | -2.3473146441 |
| H50 | -1.2870185773 | -3.7138159247 | -4.2138443825 |
| H51 | -0.5221309231 | -1.3777267862 | -4.0540879407 |
| H52 | -2.3001200097 | -1.0666836293 | -0.1408891727 |
| H53 | -3.0888244494 | -3.4017522244 | -0.3143377263 |
| C54 | 3.9041112141  | 0.6977810022  | -1.5576091495 |
| C55 | 3.2735204598  | -0.4055451261 | -2.1411877564 |

|     |               |               |               |
|-----|---------------|---------------|---------------|
| C56 | 1.8833193039  | -0.4403807649 | -2.2699578151 |
| C57 | 1.1031671153  | 0.6333780879  | -1.8142700115 |
| C58 | 1.7450642075  | 1.7440164041  | -1.2401280437 |
| C59 | 3.1350303353  | 1.7764936055  | -1.1115790339 |
| H60 | 4.9861159813  | 0.7147534770  | -1.4484722434 |
| H61 | 3.8645364185  | -1.2498861721 | -2.4896469363 |
| H62 | 1.4160627440  | -1.3202892099 | -2.6994517278 |
| H63 | 1.1560880103  | 2.5801803858  | -0.8711235308 |
| H64 | 3.6133307039  | 2.6382353165  | -0.6521316986 |
| C65 | -1.7486111818 | 2.4567805333  | -6.0870770701 |
| C66 | -0.4810830045 | 2.6653047093  | -5.5383587469 |
| C67 | -0.1456597382 | 2.1062348100  | -4.3012134308 |
| C68 | -1.0802191700 | 1.3315062100  | -3.5998845993 |
| C69 | -2.3540317466 | 1.1220815303  | -4.1578769841 |
| C70 | -2.6834730712 | 1.6791570300  | -5.3934706328 |
| H71 | -2.0077558585 | 2.8941706308  | -7.0485025863 |
| H72 | 0.2537676150  | 3.2641728318  | -6.0722343855 |
| H73 | 0.8449499410  | 2.2781160753  | -3.8894306112 |
| H74 | -3.0915034346 | 0.5218461187  | -3.6296752217 |
| H75 | -3.6721858895 | 1.5077423817  | -5.8138011410 |
| C76 | -2.3774007598 | 4.5701462304  | 5.3287068793  |
| C77 | -3.3947438789 | 3.6705434844  | 5.0040504448  |
| C78 | -3.5705956183 | 3.2624387933  | 3.6832966797  |
| C79 | -2.7364255095 | 3.7458850796  | 2.6583030758  |
| C80 | -1.7217622654 | 4.6630228042  | 2.9993370365  |
| C81 | -1.5437237895 | 5.0658212348  | 4.3193087453  |
| H82 | -2.2315560801 | 4.8838284130  | 6.3601109073  |
| H83 | -4.0476851810 | 3.2787150364  | 5.7799335548  |
| H84 | -4.3557852105 | 2.5520712865  | 3.4401158625  |
| H85 | -1.0616464867 | 5.0639038867  | 2.2354063162  |
| H86 | -0.7500579625 | 5.7675762618  | 4.5651456211  |
| H87 | -1.8361600622 | 4.7912810857  | 0.2260120075  |
| C88 | -2.2950982535 | 4.2404958939  | -2.3696262864 |
| H89 | -2.2714005070 | 3.6001645285  | -3.2510098189 |
| H90 | -1.2690225060 | 4.5896859552  | -2.1952719439 |
| C91 | -3.2131023446 | 5.4476943199  | -2.6464619223 |
| H92 | -3.2258956659 | 6.1391934112  | -1.7951663488 |
| H93 | -2.8654758998 | 5.9971789473  | -3.5289932091 |
| H94 | -4.2441671042 | 5.1226789234  | -2.8322613929 |

## 2-unsubstituted, open conformation

File: PhHEtAllylPd\_PPh3\_2\_thf.out

Solution phase energy: DFT(b3lyp-d3) -2626.22475144541 au



|     |               |               |               |
|-----|---------------|---------------|---------------|
| Pd1 | -1.6231432005 | 1.9116258053  | -0.0499103079 |
| P2  | -0.7448599131 | 0.6996557582  | -1.9170706750 |
| P3  | -0.6236172236 | 0.6907653490  | 1.8017253615  |
| C4  | -2.6162174916 | 3.9470450996  | 0.1453899296  |
| C5  | -3.0553548750 | 3.2422941532  | 1.2788667159  |
| C6  | -2.8483017472 | 3.4697137650  | -1.1626129085 |
| H7  | -3.8681904051 | 2.5269174433  | 1.1389060967  |
| H8  | -3.7186243250 | 2.8263931344  | -1.3130444171 |
| C10 | -3.7084141726 | -0.2686845325 | 5.1373577624  |
| C11 | -2.4359703076 | 0.1794380305  | 5.4995654266  |
| C12 | -1.4989027926 | 0.5151698750  | 4.5198726627  |
| C13 | -1.8301746683 | 0.4141164396  | 3.1619807931  |
| C14 | -3.1229646988 | -0.0066221245 | 2.8053696018  |
| C15 | -4.0526097920 | -0.3576051446 | 3.7853080853  |
| H16 | -4.4324293583 | -0.5363010697 | 5.9039570069  |
| H17 | -2.1679346811 | 0.2696084101  | 6.5501998218  |
| H18 | -0.5167004909 | 0.8622540666  | 4.8239308982  |
| H19 | -3.4102851368 | -0.0578967301 | 1.7567446950  |
| H20 | -5.0464266588 | -0.6902921821 | 3.4927579197  |
| C21 | 2.9609176745  | 3.0620184070  | 3.5575413008  |
| C22 | 2.7417171416  | 1.7399499930  | 3.9576724414  |
| C23 | 1.6694761802  | 1.0175418572  | 3.4340424080  |
| C24 | 0.7946160444  | 1.6146558119  | 2.5090001809  |
| C25 | 1.0294834275  | 2.9373545139  | 2.1082798500  |
| C26 | 2.1050410011  | 3.6591709981  | 2.6290565770  |
| H27 | 3.8015715436  | 3.6208641529  | 3.9634726426  |
| H28 | 3.4106716198  | 1.2666774543  | 4.6733002024  |
| H29 | 1.5238400934  | -0.0162439132 | 3.7357923623  |
| H30 | 0.3715967794  | 3.4000188073  | 1.3779587780  |
| H31 | 2.2768046523  | 4.6841394910  | 2.3071726225  |
| C32 | 1.1687561139  | -3.5603470519 | 1.1395616045  |
| C33 | -0.0909074929 | -3.4230693575 | 1.7255492557  |
| C34 | -0.6311689209 | -2.1547041058 | 1.9429122369  |
| C35 | 0.0815103327  | -1.0023608664 | 1.5732788775  |
| C36 | 1.3525644099  | -1.1498281980 | 0.9937649317  |
| C37 | 1.8885083638  | -2.4192226444 | 0.7785083864  |
| H38 | 1.5896242686  | -4.5494777730 | 0.9715449122  |
| H39 | -0.6565738968 | -4.3043473762 | 2.0206715030  |
| H40 | -1.6079354936 | -2.0723086876 | 2.4083055965  |
| H41 | 1.9355180113  | -0.2771888984 | 0.7195575087  |
| H42 | 2.8736182876  | -2.5122437567 | 0.3279493819  |
| C43 | -2.3408539235 | -3.6515352809 | -2.2206143241 |
| C44 | -1.6174256987 | -3.0996403028 | -3.2833256115 |

|     |               |               |               |
|-----|---------------|---------------|---------------|
| C45 | -1.1445117650 | -1.7902706331 | -3.2041954745 |
| C46 | -1.3779695210 | -1.0182920654 | -2.0502184855 |
| C47 | -2.1186128215 | -1.5761020468 | -1.0000891368 |
| C48 | -2.5954227006 | -2.8856384642 | -1.0823340477 |
| H49 | -2.7109046211 | -4.6726086083 | -2.2857766072 |
| H50 | -1.4272847242 | -3.6870755920 | -4.1790409487 |
| H51 | -0.6087481538 | -1.3657581309 | -4.0492123658 |
| H52 | -2.3232934416 | -0.9857742011 | -0.1139330104 |
| H53 | -3.1646645371 | -3.3060138695 | -0.2564887842 |
| C54 | 3.8849806051  | 0.5726067562  | -1.5557272398 |
| C55 | 3.2197741523  | -0.5033152076 | -2.1510383518 |
| C56 | 1.8297431071  | -0.4905948802 | -2.2778344002 |
| C57 | 1.0872725372  | 0.6027084372  | -1.8073380211 |
| C58 | 1.7638624253  | 1.6826578066  | -1.2172397013 |
| C59 | 3.1538903021  | 1.6695077880  | -1.0919100153 |
| H60 | 4.9672813346  | 0.5525395402  | -1.4479681608 |
| H61 | 3.7833514622  | -1.3622812658 | -2.5092755450 |
| H62 | 1.3325781393  | -1.3490237131 | -2.7174773192 |
| H63 | 1.2011177681  | 2.5268535372  | -0.8290160773 |
| H64 | 3.6614203181  | 2.5070617891  | -0.6195343914 |
| C65 | -1.6256807684 | 2.4701331284  | -6.1262340270 |
| C66 | -0.3831827916 | 2.6924059277  | -5.5275959173 |
| C67 | -0.0921317339 | 2.1383792208  | -4.2775852018 |
| C68 | -1.0463543571 | 1.3569481594  | -3.6106788659 |
| C69 | -2.2950474346 | 1.1341445878  | -4.2187333108 |
| C70 | -2.5794902207 | 1.6842920075  | -5.4690031819 |
| H71 | -1.8492174052 | 2.9017746621  | -7.0991029938 |
| H72 | 0.3676075178  | 3.2954468638  | -6.0336867648 |
| H73 | 0.8812952700  | 2.3175186727  | -3.8299639914 |
| H74 | -3.0471873967 | 0.5272022404  | -3.7199314816 |
| H75 | -3.5479805144 | 1.5000289371  | -5.9290292613 |
| C76 | -2.5446627453 | 4.4635569169  | 5.3541677736  |
| C77 | -3.5698610653 | 3.5878705432  | 4.9899599838  |
| C78 | -3.7116942480 | 3.1933437494  | 3.6610360384  |
| C79 | -2.8354486826 | 3.6670409346  | 2.6676832468  |
| C80 | -1.8129436283 | 4.5587853097  | 3.0478573626  |
| C81 | -1.6683238772 | 4.9484234940  | 4.3763106452  |
| H82 | -2.4252749686 | 4.7659169322  | 6.3923612155  |
| H83 | -4.2553426422 | 3.2045640882  | 5.7416974503  |
| H84 | -4.5052460581 | 2.5039732482  | 3.3861957822  |
| H85 | -1.1177173151 | 4.9460794644  | 2.3090182216  |
| H86 | -0.8671421752 | 5.6299223867  | 4.6532533438  |
| H87 | -1.9580987420 | 4.8021344895  | 0.2839962767  |

|     |               |              |               |
|-----|---------------|--------------|---------------|
| C88 | -2.3827265507 | 4.2232439964 | -2.3863599654 |
| H89 | -3.1402610661 | 4.9941964043 | -2.6028362390 |
| H90 | -2.4005529751 | 3.5477305104 | -3.2436695344 |
| C91 | -1.0013080812 | 4.8767385933 | -2.2763001067 |
| H92 | -0.2387103391 | 4.1262283503 | -2.0368815736 |
| H93 | -0.7251696539 | 5.3428637938 | -3.2278026204 |
| H94 | -0.9673812991 | 5.6554556195 | -1.5050724305 |

## 2-Me, closed conformation

File: PhMeEtAllylPd\_PPh3\_2\_thf.out

Solution phase energy: DFT(b3lyp-d3) -2665.53443513825 au

|     |               |               |               |
|-----|---------------|---------------|---------------|
| Pd  | -1.4997062694 | 1.9600324884  | -0.0418714055 |
| P4  | -0.6923925964 | 0.6638434564  | -1.9000521490 |
| P7  | -0.5730207476 | 0.7425144099  | 1.8400379157  |
| C10 | -2.4016126254 | 4.0986385198  | 0.1511302348  |
| C11 | -2.9236267765 | 3.3072257914  | 1.2015145023  |
| C12 | -2.5612821322 | 3.5773831707  | -1.1679815004 |
| H15 | -3.7346811496 | 2.6320292770  | 0.9174863725  |
| H16 | -3.4502835160 | 2.9688125023  | -1.3562781281 |
| C18 | -3.8055103134 | -0.1557954714 | 5.0590639717  |
| C19 | -2.5477376146 | 0.2921155411  | 5.4707822574  |
| C20 | -1.5620096462 | 0.6043242290  | 4.5308979215  |
| C21 | -1.8281652590 | 0.4820759690  | 3.1606514140  |
| C22 | -3.1065828997 | 0.0623987223  | 2.7530864868  |
| C23 | -4.0833519183 | -0.2673082953 | 3.6935448066  |
| H24 | -4.5661280360 | -0.4053698358 | 5.7954310045  |
| H25 | -2.3274207349 | 0.4007154245  | 6.5307000988  |
| H26 | -0.5944489292 | 0.9533884486  | 4.8764933161  |
| H27 | -3.3485624593 | 0.0007032601  | 1.6940237245  |
| H28 | -5.0638728953 | -0.5983399651 | 3.3576503900  |
| C28 | 3.0615679948  | 3.0936219128  | 3.5407886102  |
| C29 | 2.7467770861  | 1.8315802322  | 4.0567611036  |
| C30 | 1.6545990573  | 1.1198955838  | 3.5578625564  |
| C31 | 0.8491095540  | 1.6694994737  | 2.5447454255  |
| C32 | 1.1853021767  | 2.9269529631  | 2.0205457753  |
| C33 | 2.2818409421  | 3.6368174133  | 2.5158353556  |
| H34 | 3.9174722880  | 3.6431265165  | 3.9264165150  |
| H35 | 3.3589840064  | 1.3939745275  | 4.8424750663  |
| H36 | 1.4437219132  | 0.1264743060  | 3.9454591495  |
| H37 | 0.5927864509  | 3.3453304382  | 1.2116555886  |
| H38 | 2.5300681200  | 4.6097980829  | 2.0968914881  |
| C38 | 1.2513347013  | -3.4875504420 | 1.1704329594  |
| C39 | 0.0288449848  | -3.3625086429 | 1.8331000374  |

|     |               |               |               |
|-----|---------------|---------------|---------------|
| C40 | -0.5206699043 | -2.0999737878 | 2.0643734048  |
| C41 | 0.1470378738  | -0.9439025700 | 1.6316998831  |
| C42 | 1.3841921606  | -1.0772701878 | 0.9798465024  |
| C43 | 1.9288063302  | -2.3402449832 | 0.7497024879  |
| H44 | 1.6764799279  | -4.4721555077 | 0.9866166204  |
| H45 | -0.5020461186 | -4.2490193134 | 2.1736578195  |
| H46 | -1.4712922980 | -2.0248758033 | 2.5827672383  |
| H47 | 1.9296638555  | -0.1976652790 | 0.6532283429  |
| H48 | 2.8843267609  | -2.4245981804 | 0.2377642419  |
| C48 | -2.3790508500 | -3.6690569388 | -2.0600681126 |
| C49 | -1.6911979253 | -3.1425831912 | -3.1593799059 |
| C50 | -1.1866426080 | -1.8429581508 | -3.1157404070 |
| C51 | -1.3493312152 | -1.0530450984 | -1.9614592249 |
| C52 | -2.0548715557 | -1.5833637819 | -0.8741208600 |
| C53 | -2.5641161082 | -2.8835624438 | -0.9211652192 |
| H54 | -2.7762808594 | -4.6810446091 | -2.0981418817 |
| H55 | -1.5553734119 | -3.7414538546 | -4.0573889635 |
| H56 | -0.6817991741 | -1.4385661502 | -3.9893346614 |
| H57 | -2.2102545935 | -0.9798812099 | 0.0102632437  |
| H58 | -3.1060438794 | -3.2806170733 | -0.0660032678 |
| C58 | 3.9537411449  | 0.5280613701  | -1.8284442193 |
| C59 | 3.2492079869  | -0.5737056196 | -2.3216046959 |
| C60 | 1.8533775398  | -0.5604479220 | -2.3606336653 |
| C61 | 1.1427858648  | 0.5598103920  | -1.9047481067 |
| C62 | 1.8572654091  | 1.6671274087  | -1.4195557729 |
| C63 | 3.2530690949  | 1.6526202901  | -1.3820134127 |
| H64 | 5.0406175748  | 0.5097019112  | -1.7907476647 |
| H65 | 3.7865693567  | -1.4528566721 | -2.6707390039 |
| H66 | 1.3280416251  | -1.4375282625 | -2.7233765494 |
| H67 | 1.3201406112  | 2.5382465331  | -1.0526318107 |
| H68 | 3.7916606085  | 2.5143216918  | -0.9951182792 |
| C68 | -1.9100574968 | 2.3290031867  | -6.0660418950 |
| C69 | -0.5733113551 | 2.3959474614  | -5.6664037349 |
| C70 | -0.1754384099 | 1.8660304004  | -4.4335162127 |
| C71 | -1.1170992343 | 1.2633771017  | -3.5874863240 |
| C72 | -2.4598888842 | 1.1882940442  | -4.0007016484 |
| C73 | -2.8520104205 | 1.7159798865  | -5.2304475434 |
| H74 | -2.2174714447 | 2.7470622289  | -7.0219920286 |
| H75 | 0.1670444628  | 2.8631009157  | -6.3126273948 |
| H76 | 0.8673803175  | 1.9311030368  | -4.1361464647 |
| H77 | -3.2032114757 | 0.7200495371  | -3.3585911042 |
| H78 | -3.8943841887 | 1.6529180370  | -5.5355362353 |
| C78 | -2.9852359346 | 4.0897309581  | 5.4218103812  |

|     |               |              |               |
|-----|---------------|--------------|---------------|
| C79 | -4.0832864375 | 3.5223977662 | 4.7705316490  |
| C80 | -4.0294413209 | 3.2669037393 | 3.4021922390  |
| C81 | -2.8836920373 | 3.5853748240 | 2.6479777347  |
| C82 | -1.7813468081 | 4.1428687387 | 3.3222218885  |
| C83 | -1.8326818079 | 4.3925545328 | 4.6919107870  |
| H84 | -3.0217628878 | 4.2808642076 | 6.4921962686  |
| H85 | -4.9793310400 | 3.2667037077 | 5.3314023390  |
| H86 | -4.8854547796 | 2.8143704846 | 2.9063854982  |
| H87 | -0.8634596730 | 4.3489925270 | 2.7879362409  |
| H88 | -0.9638690871 | 4.8143748839 | 5.1924727817  |
| C88 | -1.5932092279 | 5.3579058366 | 0.3911821928  |
| H89 | -1.8117250825 | 6.1041331077 | -0.3780051278 |
| H90 | -1.8353938822 | 5.7938416765 | 1.3622169191  |
| H91 | -0.5129545392 | 5.1743269316 | 0.3628914682  |
| C91 | -2.0172382690 | 4.2969932254 | -2.3777461959 |
| H92 | -1.8094449709 | 3.5765839029 | -3.1676694631 |
| H94 | -1.0645477295 | 4.7839769105 | -2.1405183363 |
| C94 | -3.0240554314 | 5.3303678763 | -2.9195882504 |
| H95 | -3.2699617960 | 6.0919350977 | -2.1701760173 |
| H96 | -2.6121732209 | 5.8377407820 | -3.7994467611 |
| H97 | -3.9582339586 | 4.8389104193 | -3.2178736445 |

## 2-Me, open conformation

File: PhMeEtAllylPd\_PPh3\_2\_open\_thf.out

Solution phase energy: DFT(b3lyp-d3) -2665.53015714998 au

|     |               |               |               |
|-----|---------------|---------------|---------------|
| Pd  | -1.5035577969 | 1.9887941957  | -0.0318753647 |
| P4  | -0.6811512516 | 0.7099171865  | -1.8911191712 |
| P7  | -0.5610573592 | 0.7443763819  | 1.8260611991  |
| C10 | -2.4961922750 | 4.1044607263  | 0.1835700488  |
| C11 | -2.9561592062 | 3.2790617924  | 1.2381073560  |
| C12 | -2.6458757827 | 3.5742302274  | -1.1330886952 |
| H15 | -3.7346373248 | 2.5601411113  | 0.9704393836  |
| H16 | -3.5062265215 | 2.9162944411  | -1.2834061564 |
| C18 | -3.7253005790 | -0.1632410565 | 5.0987467015  |
| C19 | -2.4643968820 | 0.2939323367  | 5.4873636378  |
| C20 | -1.5014193711 | 0.6149382769  | 4.5280940281  |
| C21 | -1.7966717895 | 0.4924784385  | 3.1639991865  |
| C22 | -3.0812945045 | 0.0696075707  | 2.7805248048  |
| C23 | -4.0346103989 | -0.2700771604 | 3.7402406100  |
| H24 | -4.4684854552 | -0.4208923579 | 5.8501334521  |
| H25 | -2.2241716427 | 0.4015167981  | 6.5430026564  |
| H26 | -0.5280622518 | 0.9679902452  | 4.8525777937  |
| H27 | -3.3442801519 | 0.0092770304  | 1.7263441358  |

|     |               |               |               |
|-----|---------------|---------------|---------------|
| H28 | -5.0208031625 | -0.6053497611 | 3.4262470284  |
| C28 | 3.1180110372  | 2.9895463786  | 3.5558020852  |
| C29 | 2.8061128632  | 1.7069066069  | 4.0180471627  |
| C30 | 1.6997541453  | 1.0272654790  | 3.5079298219  |
| C31 | 0.8807436824  | 1.6299615858  | 2.5368066499  |
| C32 | 1.2117842354  | 2.9105258521  | 2.0705062584  |
| C33 | 2.3214718052  | 3.5894822573  | 2.5775364720  |
| H34 | 3.9859505560  | 3.5139228650  | 3.9499459697  |
| H35 | 3.4305706115  | 1.2295234083  | 4.7701826645  |
| H36 | 1.4859732350  | 0.0193815609  | 3.8538886408  |
| H37 | 0.6035302626  | 3.3731732996  | 1.2970987051  |
| H38 | 2.5672938645  | 4.5814819947  | 2.2046622331  |
| C38 | 1.1580474663  | -3.5317108290 | 1.1403844874  |
| C39 | -0.0692381231 | -3.3770052807 | 1.7868841443  |
| C40 | -0.5869983817 | -2.1014876102 | 2.0176173983  |
| C41 | 0.1166664869  | -0.9602567384 | 1.6013619343  |
| C42 | 1.3590467141  | -1.1244690449 | 0.9666237264  |
| C43 | 1.8718557441  | -2.4007483066 | 0.7363906955  |
| H44 | 1.5591840874  | -4.5264019029 | 0.9574595373  |
| H45 | -0.6286536508 | -4.2501417140 | 2.1159257188  |
| H46 | -1.5414094371 | -2.0042787854 | 2.5242896298  |
| H47 | 1.9358714583  | -0.2590508457 | 0.6579372918  |
| H48 | 2.8327416830  | -2.5077574732 | 0.2390834892  |
| C48 | -2.4341271462 | -3.5928932242 | -2.0918044226 |
| C49 | -1.6973587403 | -3.0861037854 | -3.1676262112 |
| C50 | -1.1705059625 | -1.7967019300 | -3.1109286376 |
| C51 | -1.3577934044 | -0.9996101477 | -1.9652359071 |
| C52 | -2.1127736890 | -1.5118023387 | -0.9032350328 |
| C53 | -2.6458498779 | -2.8008981002 | -0.9630441690 |
| H54 | -2.8492999658 | -4.5973146295 | -2.1406041835 |
| H55 | -1.5421794980 | -3.6918140118 | -4.0578976136 |
| H56 | -0.6315156807 | -1.4051745000 | -3.9695697686 |
| H57 | -2.2892360332 | -0.9012443770 | -0.0258719380 |
| H58 | -3.2267259092 | -3.1833305947 | -0.1269485772 |
| C58 | 3.9639026670  | 0.5013761908  | -1.7129335829 |
| C59 | 3.2546365634  | -0.5641023565 | -2.2762354166 |
| C60 | 1.8606082292  | -0.5259137068 | -2.3494012233 |
| C61 | 1.1544001049  | 0.5829339988  | -1.8574511245 |
| C62 | 1.8749729778  | 1.6521216949  | -1.2998999142 |
| C63 | 3.2690613331  | 1.6133975733  | -1.2285887300 |
| H64 | 5.0489590261  | 0.4626650369  | -1.6484453323 |
| H65 | 3.7868961468  | -1.4348772436 | -2.6533389611 |
| H66 | 1.3330595194  | -1.3770230240 | -2.7669265810 |

|     |               |              |               |
|-----|---------------|--------------|---------------|
| H67 | 1.3440426814  | 2.5086836119 | -0.8941771329 |
| H68 | 3.8094571843  | 2.4449686306 | -0.7826090550 |
| C68 | -1.7604639114 | 2.1765174736 | -6.1657031926 |
| C69 | -0.4364057440 | 2.2591243569 | -5.7309242746 |
| C70 | -0.0854368587 | 1.8163107689 | -4.4518937709 |
| C71 | -1.0621321360 | 1.2900583963 | -3.5971232381 |
| C72 | -2.3939513884 | 1.2076089543 | -4.0405903559 |
| C73 | -2.7398004995 | 1.6458383793 | -5.3177942293 |
| H74 | -2.0305034428 | 2.5207146610 | -7.1616303391 |
| H75 | 0.3301072282  | 2.6655764604 | -6.3872233490 |
| H76 | 0.9495970599  | 1.8811162200 | -4.1286056264 |
| H77 | -3.1621319324 | 0.7921115312 | -3.3912710848 |
| H78 | -3.7729256174 | 1.5744389564 | -5.6513602812 |
| C78 | -2.9615494744 | 4.1199458409 | 5.4468607681  |
| C79 | -4.0564597919 | 3.5122293270 | 4.8271798285  |
| C80 | -4.0228196542 | 3.2350324657 | 3.4621713889  |
| C81 | -2.9013140455 | 3.5723821704 | 2.6812524356  |
| C82 | -1.8026290258 | 4.1728771263 | 3.3232667333  |
| C83 | -1.8324287531 | 4.4427780183 | 4.6895198633  |
| H84 | -2.9825178100 | 4.3286593220 | 6.5143109305  |
| H85 | -4.9342608533 | 3.2430749663 | 5.4100597465  |
| H86 | -4.8756849065 | 2.7522265046 | 2.9901120188  |
| H87 | -0.9053920416 | 4.4017409744 | 2.7632280866  |
| H88 | -0.9669744645 | 4.8982957299 | 5.1657934685  |
| C88 | -1.8058824177 | 5.4285710733 | 0.4338268134  |
| H89 | -2.0326921013 | 6.1292942387 | -0.3754501259 |
| H90 | -2.1538687616 | 5.8672275999 | 1.3724471232  |
| H91 | -0.7162756743 | 5.3366041607 | 0.4946309623  |
| C91 | -2.1897355668 | 4.2930906604 | -2.3876442201 |
| H92 | -2.7796221342 | 5.2209852916 | -2.4738357074 |
| H94 | -2.4754473924 | 3.6816052275 | -3.2465549625 |
| C94 | -0.6956978916 | 4.6318956110 | -2.5056096789 |
| H95 | -0.0847098211 | 3.7345703312 | -2.3738869068 |
| H96 | -0.4832200499 | 5.0317874086 | -3.5031807971 |
| H97 | -0.3673363206 | 5.3736630460 | -1.7731663561 |

## 2-BPin, closed conformation

File: PhBPinEtAllylPd\_PPh3\_2\_thf.out

Solution phase energy: DFT(b3lyp-d3) -3036.90454032419 au

|     |               |              |               |
|-----|---------------|--------------|---------------|
| Pd  | -1.7943875210 | 1.8869742809 | 0.0351496713  |
| P4  | -0.8645824671 | 0.9198457393 | -1.9509848298 |
| P7  | -0.6951036224 | 0.6123859179 | 1.7927884480  |
| C10 | -2.7768856805 | 3.9047624723 | 0.3611256824  |

|     |               |               |               |
|-----|---------------|---------------|---------------|
| C11 | -3.1508170664 | 3.1560877138  | 1.4976339511  |
| C12 | -3.1663532668 | 3.3898487717  | -0.9105363460 |
| H15 | -3.9921529465 | 2.4688442848  | 1.3802904277  |
| H16 | -4.0515211596 | 2.7460052864  | -0.9369583610 |
| C18 | -3.7236051048 | -0.2321109253 | 5.2190280514  |
| C19 | -2.4533511725 | 0.2484724647  | 5.5434355471  |
| C20 | -1.5227031492 | 0.5301959246  | 4.5398304263  |
| C21 | -1.8563649806 | 0.3377427828  | 3.1927689823  |
| C22 | -3.1461616874 | -0.1221015241 | 2.8712266398  |
| C23 | -4.0693867471 | -0.4138631914 | 3.8760133471  |
| H24 | -4.4435456615 | -0.4515611554 | 6.0040607921  |
| H25 | -2.1813762455 | 0.4136940657  | 6.5837005593  |
| H26 | -0.5474073440 | 0.9162710978  | 4.8166833713  |
| H27 | -3.4330030021 | -0.2521730114 | 1.8286797482  |
| H28 | -5.0601503536 | -0.7754096771 | 3.6083531364  |
| C28 | 3.1667921369  | 2.6325496625  | 3.3881451228  |
| C29 | 2.7789507077  | 1.3802641549  | 3.8764020889  |
| C30 | 1.6129412649  | 0.7782692727  | 3.4062766390  |
| C31 | 0.8066236635  | 1.4322553860  | 2.4567676572  |
| C32 | 1.2090082724  | 2.6802634653  | 1.9629592311  |
| C33 | 2.3840611142  | 3.2759049023  | 2.4282701883  |
| H34 | 4.0828905631  | 3.0971840982  | 3.7472101383  |
| H35 | 3.3916721015  | 0.8660424409  | 4.6138146387  |
| H36 | 1.3391824334  | -0.2098736030 | 3.7671930711  |
| H37 | 0.6187663567  | 3.1872388518  | 1.2066842318  |
| H38 | 2.6923483013  | 4.2394443192  | 2.0308820437  |
| C38 | 1.0095680350  | -3.6034155528 | 0.7843822660  |
| C39 | -0.1057860741 | -3.5015861914 | 1.6180034172  |
| C40 | -0.6300130459 | -2.2488492676 | 1.9516810955  |
| C41 | -0.0380125559 | -1.0795203515 | 1.4540870808  |
| C42 | 1.0964833073  | -1.1887783308 | 0.6328968926  |
| C43 | 1.6122251587  | -2.4391997066 | 0.2972069753  |
| H44 | 1.4108252000  | -4.5795287303 | 0.5217946012  |
| H45 | -0.5755771542 | -4.3997289172 | 2.0139529304  |
| H46 | -1.4991035119 | -2.1946319992 | 2.6000697767  |
| H47 | 1.5837669425  | -0.2946067758 | 0.2572571259  |
| H48 | 2.4883321040  | -2.5039787323 | -0.3441944389 |
| C48 | -1.5729745904 | -3.6417255591 | -2.4749324765 |
| C49 | -0.8611048486 | -2.9296819585 | -3.4470155098 |
| C50 | -0.6439489666 | -1.5603071889 | -3.2963546323 |
| C51 | -1.1161930026 | -0.8869783320 | -2.1540775252 |
| C52 | -1.8496308759 | -1.6035596878 | -1.1997376139 |
| C53 | -2.0745941644 | -2.9730357395 | -1.3569598740 |



|     |               |               |               |
|-----|---------------|---------------|---------------|
| H54 | -1.7432280711 | -4.7092268221 | -2.5956750016 |
| H55 | -0.4838838111 | -3.4393310424 | -4.3310970970 |
| H56 | -0.1205994460 | -1.0140803348 | -4.0772110015 |
| H57 | -2.2434247088 | -1.0913753342 | -0.3280546424 |
| H58 | -2.6380290970 | -3.5149280367 | -0.6014216236 |
| C58 | 3.6643809263  | 1.9969716958  | -1.9199026997 |
| C59 | 3.2789151749  | 0.7121195767  | -2.3129412308 |
| C60 | 1.9287022829  | 0.3529448054  | -2.3354949293 |
| C61 | 0.9433194795  | 1.2768787834  | -1.9543551772 |
| C62 | 1.3377966939  | 2.5656721120  | -1.5510036257 |
| C63 | 2.6876593116  | 2.9221967599  | -1.5410679200 |
| H64 | 4.7167602506  | 2.2712827021  | -1.9023315346 |
| H65 | 4.0313186765  | -0.0184953762 | -2.6024969739 |
| H66 | 1.6561695866  | -0.6557141643 | -2.6281353500 |
| H67 | 0.5936884826  | 3.2918248252  | -1.2310585051 |
| H68 | 2.9781733072  | 3.9221715013  | -1.2260078947 |
| C68 | -2.4907220228 | 2.5260416943  | -6.0058104353 |
| C69 | -1.2448999692 | 2.9605649414  | -5.5486141589 |
| C70 | -0.7201082195 | 2.4693790399  | -4.3487601754 |
| C71 | -1.4407885331 | 1.5350257872  | -3.5925123396 |
| C72 | -2.6914131581 | 1.0945121942  | -4.0618169100 |
| C73 | -3.2110104316 | 1.5861728503  | -5.2589644691 |
| H74 | -2.8978727762 | 2.9118254878  | -6.9376314434 |
| H75 | -0.6734658597 | 3.6842798626  | -6.1261139552 |
| H76 | 0.2501240724  | 2.8204718018  | -4.0103002767 |
| H77 | -3.2628791884 | 0.3645919221  | -3.4925594047 |
| H78 | -4.1798018089 | 1.2357571052  | -5.6088382794 |
| C78 | -2.3992555198 | 4.2096576673  | 5.5825971075  |
| C79 | -3.5962142752 | 3.5955031750  | 5.2065053334  |
| C80 | -3.8115821686 | 3.2334027223  | 3.8776729844  |
| C81 | -2.8413633453 | 3.4964200912  | 2.8944719767  |
| C82 | -1.6366534051 | 4.1043204615  | 3.2900533569  |
| C83 | -1.4167943948 | 4.4564586093  | 4.6186444359  |
| H84 | -2.2266030807 | 4.4823733324  | 6.6214418793  |
| H85 | -4.3607521637 | 3.3883308605  | 5.9515974878  |
| H86 | -4.7416732382 | 2.7459579891  | 3.5942278387  |
| H87 | -0.8520193699 | 4.2687111653  | 2.5622243186  |
| H88 | -0.4718117865 | 4.9128947307  | 4.9051179429  |
| C91 | -2.8935534440 | 4.1417401614  | -2.1908381548 |
| H92 | -3.0050510953 | 3.4676497359  | -3.0397547281 |
| H94 | -1.8571190182 | 4.4973084003  | -2.2070396692 |
| C94 | -3.8603168698 | 5.3297125744  | -2.3664329675 |
| H95 | -3.7461511061 | 6.0568442082  | -1.5557699017 |

|      |               |              |               |
|------|---------------|--------------|---------------|
| H96  | -3.6643203133 | 5.8388009698 | -3.3176848113 |
| H97  | -4.9027383890 | 4.9885482541 | -2.3736500855 |
| C96  | -1.1344862671 | 7.3308851306 | 0.6857559409  |
| C97  | 0.0109346650  | 6.4756823393 | 0.0103993077  |
| C107 | 0.1525052363  | 6.7107721565 | -1.4966240834 |
| H108 | 0.8267893642  | 5.9555182014 | -1.9143542322 |
| H109 | -0.8109693272 | 6.6273128671 | -2.0087445409 |
| H110 | 0.5711757796  | 7.7004534351 | -1.7050971634 |
| C110 | 1.3724845568  | 6.5779076510 | 0.6916525898  |
| H111 | 2.0944357579  | 5.9386059145 | 0.1715462517  |
| H112 | 1.7441661839  | 7.6081285437 | 0.6533471850  |
| H113 | 1.3279598063  | 6.2635115752 | 1.7371429806  |
| C113 | -1.4802094994 | 8.6250870629 | -0.0459042388 |
| H114 | -0.6127369934 | 9.2950351770 | -0.0620024201 |
| H115 | -1.7974497222 | 8.4404606841 | -1.0749868642 |
| H116 | -2.2958036152 | 9.1362906799 | 0.4763752814  |
| C116 | -0.9021063723 | 7.6123720730 | 2.1730767215  |
| H117 | -0.0670006783 | 8.3058882876 | 2.3154757692  |
| H118 | -1.8050542240 | 8.0646726691 | 2.5955821589  |
| H119 | -0.6967052404 | 6.6943219060 | 2.7300918811  |
| B112 | -1.8284729690 | 5.1690216620 | 0.4059807679  |
| O116 | -2.2953304344 | 6.4321726286 | 0.6055408624  |
| O114 | -0.4810594901 | 5.0999026974 | 0.1677487841  |

## 2-BPin, open conformation

File: PhBPinEtAllylPd\_PPh3\_2\_open\_thf.out

Solution phase energy: DFT(b3lyp-d3) -3036.89704120554 au

|     |               |               |               |
|-----|---------------|---------------|---------------|
| Pd  | -1.7190739392 | 1.9504235434  | -0.0117907903 |
| P4  | -0.9196167430 | 0.8347346340  | -1.9933738617 |
| P7  | -0.5758416348 | 0.7111396983  | 1.7381075310  |
| C10 | -2.7327482912 | 3.9573634019  | 0.2699441333  |
| C11 | -2.9968190163 | 3.1963340063  | 1.4431479203  |
| C12 | -3.2388414382 | 3.3902236699  | -0.9289062293 |
| H15 | -3.8305370020 | 2.4944848348  | 1.3646130430  |
| H16 | -4.0644820436 | 2.6817468571  | -0.8105813954 |
| C18 | -3.6036651965 | -0.2489918925 | 5.1282713525  |
| C19 | -2.3403045763 | 0.2359241354  | 5.4707896801  |
| C20 | -1.4125639924 | 0.5598980208  | 4.4776655332  |
| C21 | -1.7439893987 | 0.4055041076  | 3.1251600066  |
| C22 | -3.0286786356 | -0.0561440617 | 2.7877658468  |
| C23 | -3.9487592001 | -0.3902711792 | 3.7810370697  |
| H24 | -4.3207720629 | -0.5037348740 | 5.9055193975  |
| H25 | -2.0716171123 | 0.3695166683  | 6.5165041416  |

|     |               |               |               |
|-----|---------------|---------------|---------------|
| H26 | -0.4412776167 | 0.9467542727  | 4.7673313702  |
| H27 | -3.3156310482 | -0.1538813608 | 1.7423774776  |
| H28 | -4.9355412761 | -0.7537974643 | 3.5021658781  |
| C28 | 3.2708029101  | 2.6643643323  | 3.4498855956  |
| C29 | 2.8675083744  | 1.3997655144  | 3.8892965268  |
| C30 | 1.7069450409  | 0.8227679633  | 3.3778743221  |
| C31 | 0.9206684303  | 1.5129894458  | 2.4358794789  |
| C32 | 1.3383988897  | 2.7739406767  | 1.9905482877  |
| C33 | 2.5089765262  | 3.3437204429  | 2.4983977138  |
| H34 | 4.1816926818  | 3.1118532542  | 3.8420390475  |
| H35 | 3.4620478170  | 0.8567097837  | 4.6208758624  |
| H36 | 1.4202031820  | -0.1748833604 | 3.7005617864  |
| H37 | 0.7584444053  | 3.3142598287  | 1.2494337636  |
| H38 | 2.8307969044  | 4.3195627020  | 2.1456470416  |
| C38 | 1.2001428968  | -3.4754458993 | 0.7621907953  |
| C39 | 0.0572799350  | -3.3915795804 | 1.5589588253  |
| C40 | -0.4931453664 | -2.1472637653 | 1.8751820243  |
| C41 | 0.0997191213  | -0.9707844281 | 1.3958409705  |
| C42 | 1.2635048320  | -1.0618940635 | 0.6153371173  |
| C43 | 1.8044954854  | -2.3049485535 | 0.2948158485  |
| H44 | 1.6230713881  | -4.4460707806 | 0.5124434338  |
| H45 | -0.4121721764 | -4.2966788884 | 1.9387427939  |
| H46 | -1.3823909959 | -2.1041908323 | 2.4957130261  |
| H47 | 1.7562041680  | -0.1605234384 | 0.2657399727  |
| H48 | 2.7019344356  | -2.3571452816 | -0.3174094799 |
| C48 | -1.9930379109 | -3.6816723590 | -2.2792078604 |
| C49 | -1.3252164256 | -3.0545070825 | -3.3372767886 |
| C50 | -1.0042238101 | -1.6996014455 | -3.2609919007 |
| C51 | -1.3294311939 | -0.9531728084 | -2.1124078916 |
| C52 | -2.0180116307 | -1.5855398189 | -1.0699461520 |
| C53 | -2.3460422897 | -2.9411001105 | -1.1504759779 |
| H54 | -2.2444483454 | -4.7381430473 | -2.3419798515 |
| H55 | -1.0616531352 | -3.6193888332 | -4.2290218290 |
| H56 | -0.5193860322 | -1.2198825011 | -4.1071548147 |
| H57 | -2.3003975072 | -1.0175942966 | -0.1903691351 |
| H58 | -2.8739456744 | -3.4161787500 | -0.3271640796 |
| C58 | 3.6935239767  | 1.4227606919  | -1.9680242171 |
| C59 | 3.1670297085  | 0.2327341741  | -2.4793945562 |
| C60 | 1.7864261603  | 0.0281241765  | -2.5120423466 |
| C61 | 0.9131349311  | 1.0134193828  | -2.0272818876 |
| C62 | 1.4496177193  | 2.2098241181  | -1.5213100068 |
| C63 | 2.8305883227  | 2.4137384017  | -1.4933916602 |
| H64 | 4.7705241377  | 1.5735466576  | -1.9345717752 |

|      |               |               |               |
|------|---------------|---------------|---------------|
| H65  | 3.8335303458  | -0.5442710862 | -2.8479873674 |
| H66  | 1.4036336295  | -0.9146012447 | -2.8871631550 |
| H67  | 0.7888800966  | 2.9821147425  | -1.1333528260 |
| H68  | 3.2325717623  | 3.3393487243  | -1.0877968876 |
| C68  | -2.3504822539 | 2.3631058117  | -6.1546755313 |
| C69  | -1.1062255807 | 2.7633982567  | -5.6617558474 |
| C70  | -0.6527370359 | 2.2988979671  | -4.4231668843 |
| C71  | -1.4398664822 | 1.4228115690  | -3.6623111953 |
| C72  | -2.6911440601 | 1.0214676357  | -4.1652165002 |
| C73  | -3.1405737265 | 1.4862975430  | -5.4019437506 |
| H74  | -2.7011774472 | 2.7269886233  | -7.1177786916 |
| H75  | -0.4812503763 | 3.4399137696  | -6.2411624314 |
| H76  | 0.3184639985  | 2.6213807094  | -4.0595888827 |
| H77  | -3.3154336748 | 0.3364229411  | -3.5956637595 |
| H78  | -4.1095884794 | 1.1634858976  | -5.7771366563 |
| C78  | -2.2903325707 | 4.2029010762  | 5.5572591355  |
| C79  | -3.4813965755 | 3.5971884642  | 5.1493883968  |
| C80  | -3.6736723269 | 3.2643736560  | 3.8095498227  |
| C81  | -2.6890761853 | 3.5473198187  | 2.8437442039  |
| C82  | -1.4925230023 | 4.1502889475  | 3.2703678171  |
| C83  | -1.2954045628 | 4.4713267353  | 4.6122275590  |
| H84  | -2.1328681370 | 4.4510936003  | 6.6047252360  |
| H85  | -4.2569104217 | 3.3700754399  | 5.8773186980  |
| H86  | -4.5973340588 | 2.7783905168  | 3.5032687324  |
| H87  | -0.7033030081 | 4.3425328128  | 2.5576309025  |
| H88  | -0.3550768030 | 4.9216225666  | 4.9231116565  |
| C91  | -3.1982601889 | 4.0031660754  | -2.3043417488 |
| H92  | -4.1320941035 | 4.5786834721  | -2.4202576975 |
| H94  | -3.2714910796 | 3.1939002439  | -3.0340088217 |
| C94  | -2.0064294162 | 4.8972603291  | -2.6436930564 |
| H95  | -1.0590677719 | 4.4112381614  | -2.3879233571 |
| H96  | -1.9910053800 | 5.1148736301  | -3.7160461464 |
| H97  | -2.0621869743 | 5.8517774363  | -2.1136984177 |
| C96  | -1.3402742503 | 7.4574977833  | 0.7429277623  |
| C97  | -0.0118771116 | 6.6483040702  | 0.4337870392  |
| C107 | 0.6012931478  | 6.9331882119  | -0.9407721484 |
| H108 | 1.4069929116  | 6.2141654922  | -1.1242251981 |
| H109 | -0.1293382030 | 6.8336129441  | -1.7460556090 |
| H110 | 1.0258058002  | 7.9418547779  | -0.9774510499 |
| C110 | 1.0664847066  | 6.7771644872  | 1.5086334478  |
| H111 | 1.9523943395  | 6.2076208685  | 1.2115192099  |
| H112 | 1.3654313047  | 7.8251263911  | 1.6232400368  |
| H113 | 0.7280665836  | 6.4050069784  | 2.4784530972  |

|      |               |              |               |
|------|---------------|--------------|---------------|
| C113 | -1.5240248947 | 8.7218850729 | -0.0926249493 |
| H114 | -0.7198094428 | 9.4365362296 | 0.1171151193  |
| H115 | -1.5267568635 | 8.5064756825 | -1.1641310639 |
| H116 | -2.4772824695 | 9.1967881257 | 0.1630870658  |
| C116 | -1.5472342992 | 7.7704103232 | 2.2288501283  |
| H117 | -0.8137217776 | 8.4999820894 | 2.5869460794  |
| H118 | -2.5486501959 | 8.1916219384 | 2.3661557144  |
| H119 | -1.4764738849 | 6.8672985492 | 2.8418410737  |
| B112 | -1.8425786114 | 5.2637558603 | 0.3321152001  |
| O116 | -2.3987587210 | 6.5064096541 | 0.3796768268  |
| O114 | -0.4770946269 | 5.2542528604 | 0.4103702767  |

**Transition structures, attack at either 1- or 3-position, reacting position in either *syn*- or *anti*-configuration.**

**Attack at 1-*syn***

File: PhBPiMeAllyl\_1NH3\_Pd\_PPh3\_2\_thfd.out; structure 57

Solution phase energy: DFT(b3lyp-d3) -3054.13003134393 au

|     |               |               |               |
|-----|---------------|---------------|---------------|
| Pd1 | -1.6668674134 | 1.9425685649  | -0.0614707163 |
| P2  | -0.9427600096 | 0.8041123667  | -2.0356044706 |
| P3  | -0.5065414577 | 0.8049098696  | 1.7747014331  |
| C4  | -2.6993822694 | 3.9207708302  | 0.4621406167  |
| C5  | -3.5340749335 | 3.5668421230  | 1.5622218898  |
| C6  | -3.0541601777 | 3.4031222778  | -0.8395409011 |
| H7  | -4.3436894252 | 2.8742298583  | 1.3412740720  |
| H8  | -3.9976239665 | 2.8482297366  | -0.8815222031 |
| C9  | -3.7822985533 | -0.3748408895 | 4.8582155657  |
| C10 | -2.5692147569 | 0.1270173775  | 5.3321334472  |
| C11 | -1.5680631238 | 0.5200802531  | 4.4411546853  |
| C12 | -1.7733837965 | 0.4233638085  | 3.0594086046  |
| C13 | -3.0092345922 | -0.0581673582 | 2.5911798977  |
| C14 | -4.0034435460 | -0.4622427496 | 3.4812907668  |
| H15 | -4.5562654143 | -0.6850753856 | 5.5567389943  |
| H16 | -2.3978679375 | 0.2165565064  | 6.4021545226  |
| H17 | -0.6355327880 | 0.9121517826  | 4.8323952263  |
| H18 | -3.1940950718 | -0.1161947418 | 1.5205408914  |
| H19 | -4.9497827675 | -0.8405249469 | 3.0997519400  |
| C20 | 2.9734181823  | 3.1005316734  | 3.8470664318  |
| C21 | 2.6695297527  | 1.7927367515  | 4.2393441059  |
| C22 | 1.6298714063  | 1.0999434814  | 3.6183849491  |
| C23 | 0.8618212095  | 1.7106128746  | 2.6107180402  |
| C24 | 1.1880799836  | 3.0133269969  | 2.2049797884  |
| C25 | 2.2373646807  | 3.7012658004  | 2.8229501748  |
| H26 | 3.7883860570  | 3.6396869697  | 4.3248515447  |
| H27 | 3.2487395859  | 1.3068534636  | 5.0219864687  |
| H28 | 1.4238434937  | 0.0731046136  | 3.9103970314  |
| H29 | 0.6359892491  | 3.4860638853  | 1.3965671686  |
| H30 | 2.4912931440  | 4.7072369285  | 2.4982949992  |
| C31 | 1.5201235818  | -3.3161802761 | 0.9494847434  |
| C32 | 0.4170882311  | -3.2583483456 | 1.8037081659  |
| C33 | -0.1938151312 | -2.0335079995 | 2.0899584628  |
| C34 | 0.2914367363  | -0.8466510459 | 1.5210824300  |
| C35 | 1.4132876751  | -0.9116534832 | 0.6780578903  |
| C36 | 2.0194769573  | -2.1344392675 | 0.3932219334  |
| H37 | 1.9883815576  | -4.2710608836 | 0.7213337514  |

|     |               |               |               |
|-----|---------------|---------------|---------------|
| H38 | 0.0249521200  | -4.1693044133 | 2.2518061264  |
| H39 | -1.0526009329 | -2.0127710118 | 2.7538716231  |
| H40 | 1.8150878692  | -0.0046598264 | 0.2380929739  |
| H41 | 2.8802222218  | -2.1622470423 | -0.2709341221 |
| C42 | -1.7305862065 | -3.7743425829 | -2.3693794010 |
| C43 | -1.3083505755 | -3.0574077142 | -3.4945551689 |
| C44 | -1.0812558590 | -1.6832465962 | -3.4084989560 |
| C45 | -1.2665212915 | -1.0035271943 | -2.1905134109 |
| C46 | -1.7065282590 | -1.7279813065 | -1.0754283337 |
| C47 | -1.9311653074 | -3.1041335052 | -1.1611913321 |
| H48 | -1.9075007989 | -4.8455471401 | -2.4385412606 |
| H49 | -1.1585078856 | -3.5683577173 | -4.4433598343 |
| H50 | -0.7686363495 | -1.1380296501 | -4.2952800554 |
| H51 | -1.8667752659 | -1.2178727082 | -0.1333300885 |
| H52 | -2.2613958242 | -3.6498272174 | -0.2805952767 |
| C53 | 3.6784994390  | 1.4055905671  | -2.0966197504 |
| C54 | 3.1386364916  | 0.2272741378  | -2.6206992478 |
| C55 | 1.7555832612  | 0.0279509180  | -2.6332685400 |
| C56 | 0.8918447880  | 1.0058936419  | -2.1170405410 |
| C57 | 1.4403343830  | 2.1943603894  | -1.6018749948 |
| C58 | 2.8231716310  | 2.3909346039  | -1.5937287469 |
| H59 | 4.7562048695  | 1.5526571987  | -2.0780885969 |
| H60 | 3.7959206007  | -0.5451398942 | -3.0152702732 |
| H61 | 1.3597645915  | -0.9048025285 | -3.0227697913 |
| H62 | 0.7882465428  | 2.9632224793  | -1.1909300203 |
| H63 | 3.2333562779  | 3.3100255782  | -1.1813675271 |
| C64 | -2.5172430471 | 2.3865848765  | -6.1249549072 |
| C65 | -1.2094565460 | 2.6789157080  | -5.7335514940 |
| C66 | -0.7082385547 | 2.1927220844  | -4.5213781529 |
| C67 | -1.5134154106 | 1.4091932970  | -3.6841245199 |
| C68 | -2.8298187211 | 1.1188230286  | -4.0837541854 |
| C69 | -3.3256844229 | 1.6001495297  | -5.2952021025 |
| H70 | -2.9045095739 | 2.7633880254  | -7.0690788481 |
| H71 | -0.5702976967 | 3.2833901493  | -6.3739631118 |
| H72 | 0.3138124254  | 2.4243404011  | -4.2366642516 |
| H73 | -3.4704120344 | 0.5099524496  | -3.4488383705 |
| H74 | -4.3445341742 | 1.3614899307  | -5.5927535507 |
| C75 | -2.6803319087 | 3.8212568259  | 5.7620627445  |
| C76 | -3.9317058957 | 3.3932522323  | 5.3056702122  |
| C77 | -4.1863593969 | 3.3066425439  | 3.9395205493  |
| C78 | -3.2021089922 | 3.6575548635  | 2.9964284731  |
| C79 | -1.9456820061 | 4.0637646519  | 3.4705254267  |
| C80 | -1.6859971194 | 4.1480145275  | 4.8360658130  |

|      |               |              |               |
|------|---------------|--------------|---------------|
| H81  | -2.4777965022 | 3.8820615847 | 6.8288063598  |
| H82  | -4.7067599555 | 3.1163674183 | 6.0164240377  |
| H83  | -5.1606313558 | 2.9683065348 | 3.5918233271  |
| H84  | -1.1493279277 | 4.2763588448 | 2.7721332213  |
| H85  | -0.6984684646 | 4.4513745983 | 5.1751519493  |
| C86  | -2.7416666710 | 4.1455375367 | -2.1198901853 |
| H87  | -2.9376401553 | 3.5205004118 | -2.9916860568 |
| H88  | -1.7030014878 | 4.4775599828 | -2.1598370554 |
| C89  | -0.8033322546 | 7.1541346661 | 1.0820171649  |
| C90  | -0.0251247549 | 6.5315618099 | -0.1364604708 |
| C91  | -0.4646413629 | 7.1019017436 | -1.4901774876 |
| H92  | -0.0310882167 | 6.4938375721 | -2.2907747576 |
| H93  | -1.5538505856 | 7.0808999137 | -1.5982632253 |
| H94  | -0.1209956345 | 8.1340079037 | -1.6155033866 |
| C95  | 1.4951227540  | 6.5615576552 | -0.0230905253 |
| H96  | 1.9386544173  | 6.0832756872 | -0.9029021038 |
| H97  | 1.8572101494  | 7.5950531197 | 0.0223265627  |
| H98  | 1.8468381861  | 6.0320978498 | 0.8641309107  |
| C99  | -1.2554026239 | 8.5979406078 | 0.8893509364  |
| H100 | -0.3894691716 | 9.2512798118 | 0.7307518899  |
| H101 | -1.9304800235 | 8.6982271170 | 0.0357614463  |
| H102 | -1.7826014055 | 8.9425880581 | 1.7856439243  |
| C103 | -0.0639584933 | 7.0024635430 | 2.4161004366  |
| H104 | 0.7872420920  | 7.6892221899 | 2.4721412046  |
| H105 | -0.7524509928 | 7.2315755498 | 3.2357554472  |
| H106 | 0.3071424526  | 5.9836361454 | 2.5609485677  |
| B107 | -1.6921188381 | 5.1160162457 | 0.5275500826  |
| O108 | -1.9940025797 | 6.3011947802 | 1.1502597695  |
| O109 | -0.4694491178 | 5.1356366176 | -0.1021052183 |
| H111 | -3.3842692994 | 5.0366748317 | -2.2032248689 |
| N112 | -4.9731346838 | 5.2307118925 | 1.5368363580  |
| H113 | -4.3470172490 | 6.0367551903 | 1.5534298931  |
| H114 | -5.6123617441 | 5.3062882204 | 2.3295649747  |
| H115 | -5.5262117191 | 5.2719118472 | 0.6792585306  |

### **Attack at 1-anti**

File: antiPhBPInMeAllyl\_1NH3\_Pd\_PPh3\_2\_thfd.out; structure 56

Solution phase energy: DFT(b3lyp-d3) -3054.13528376566 au

|     |               |              |               |
|-----|---------------|--------------|---------------|
| Pd1 | -1.5418942482 | 2.0304725205 | -0.1849394863 |
| P2  | -1.0370037992 | 0.6434752617 | -2.0518588220 |
| P3  | -0.4535476220 | 1.1209180942 | 1.7989667191  |
| C4  | -2.6918485118 | 4.0209444020 | 0.0772363581  |



|     |               |               |               |
|-----|---------------|---------------|---------------|
| C5  | -3.7758627344 | 3.4805694604  | 0.8505464312  |
| C6  | -2.5167733917 | 3.6419367398  | -1.2987094208 |
| H7  | -3.6106730246 | 3.4348210242  | 1.9220151628  |
| H8  | -3.3404849908 | 3.1338756683  | -1.7891884595 |
| C9  | -3.2525363019 | 1.1354696956  | 5.5204618303  |
| C10 | -2.1878357043 | 2.0376352315  | 5.4600763372  |
| C11 | -1.3111127860 | 2.0291954428  | 4.3703984646  |
| C12 | -1.4920650852 | 1.1215667597  | 3.3165775649  |
| C13 | -2.5768815317 | 0.2268129478  | 3.3793192262  |
| C14 | -3.4419126573 | 0.2258246688  | 4.4743159635  |
| H15 | -3.9270038047 | 1.1377303290  | 6.3735117087  |
| H16 | -2.0285037348 | 2.7479049183  | 6.2689989290  |
| H17 | -0.4833348037 | 2.7300533596  | 4.3505583689  |
| H18 | -2.7425447476 | -0.4826065281 | 2.5710515688  |
| H19 | -4.2629459351 | -0.4873106378 | 4.5112902309  |
| C20 | 3.5862834462  | 3.2555094567  | 2.6178655630  |
| C21 | 3.0811645649  | 2.3463519829  | 3.5556968071  |
| C22 | 1.8444322567  | 1.7394835021  | 3.3434825497  |
| C23 | 1.0800975803  | 2.0582590543  | 2.2059905783  |
| C24 | 1.5847760941  | 2.9828705879  | 1.2806908550  |
| C25 | 2.8400527679  | 3.5669541234  | 1.4801077009  |
| H26 | 4.5614767701  | 3.7128245246  | 2.7732023475  |
| H27 | 3.6612938163  | 2.0966319578  | 4.4421426957  |
| H28 | 1.4789268140  | 1.0030246621  | 4.0559640573  |
| H29 | 1.0003711049  | 3.2457891374  | 0.4032203322  |
| H30 | 3.2329811186  | 4.2653250976  | 0.7444007304  |
| C31 | 1.5700852527  | -3.0661952942 | 1.5099991054  |
| C32 | 0.6746078378  | -2.8338536389 | 2.5546489691  |
| C33 | 0.0405809256  | -1.5931450723 | 2.6820441884  |
| C34 | 0.2902616925  | -0.5743385891 | 1.7535612201  |
| C35 | 1.2042564998  | -0.8127286211 | 0.7136612044  |
| C36 | 1.8387467710  | -2.0460433030 | 0.5918636798  |
| H37 | 2.0605059125  | -4.0326910825 | 1.4142752663  |
| H38 | 0.4694234585  | -3.6170070218 | 3.2821850873  |
| H39 | -0.6381784178 | -1.4306032920 | 3.5132193336  |
| H40 | 1.4250702841  | -0.0282306725 | -0.0038018942 |
| H41 | 2.5394151333  | -2.2101445851 | -0.2236798994 |
| C42 | -2.0781485389 | -3.8780170354 | -1.6660785264 |
| C43 | -1.7675698218 | -3.3375919018 | -2.9191881439 |
| C44 | -1.4782681798 | -1.9781719586 | -3.0458775883 |
| C45 | -1.4846188006 | -1.1388570096 | -1.9163782422 |
| C46 | -1.8233114002 | -1.6849076580 | -0.6712319834 |
| C47 | -2.1121692685 | -3.0459013638 | -0.5448952343 |

|     |               |               |               |
|-----|---------------|---------------|---------------|
| H48 | -2.2975936443 | -4.9391333915 | -1.5683865541 |
| H49 | -1.7506637351 | -3.9759000280 | -3.8003296421 |
| H50 | -1.2451675591 | -1.5696928350 | -4.0262595330 |
| H51 | -1.8508915094 | -1.0453322029 | 0.2031013720  |
| H52 | -2.3566886746 | -3.4547138396 | 0.4327388086  |
| C53 | 3.5273899958  | 0.8834311655  | -2.9701459855 |
| C54 | 2.8897312426  | -0.3585983423 | -3.0318089076 |
| C55 | 1.5175166544  | -0.4644667584 | -2.7841353396 |
| C56 | 0.7635807415  | 0.6757022651  | -2.4621910180 |
| C57 | 1.4152889481  | 1.9205640249  | -2.3956209752 |
| C58 | 2.7828992114  | 2.0251140258  | -2.6552028887 |
| H59 | 4.5956124691  | 0.9610287853  | -3.1607813615 |
| H60 | 3.4610958598  | -1.2530869477 | -3.2723397879 |
| H61 | 1.0464253234  | -1.4417698203 | -2.8254004229 |
| H62 | 0.8492260664  | 2.8111343985  | -2.1325042975 |
| H63 | 3.2696404242  | 2.9968891117  | -2.6029326351 |
| C64 | -3.2718690880 | 1.8041907768  | -5.9665028820 |
| C65 | -1.8760798832 | 1.7608027401  | -5.9719129195 |
| C66 | -1.1747798574 | 1.4104831835  | -4.8127065062 |
| C67 | -1.8676234486 | 1.1033795091  | -3.6337144465 |
| C68 | -3.2728008429 | 1.1520650754  | -3.6333913139 |
| C69 | -3.9684056575 | 1.4955079647  | -4.7918428435 |
| H70 | -3.8146978654 | 2.0751206517  | -6.8692552592 |
| H71 | -1.3254183116 | 1.9949335473  | -6.8808124507 |
| H72 | -0.0890394756 | 1.3740016038  | -4.8343795582 |
| H73 | -3.8247151766 | 0.9190582053  | -2.7245207725 |
| H74 | -5.0558237618 | 1.5239790773  | -4.7789203961 |
| C75 | -6.7036623874 | 0.6967227329  | -0.5930220742 |
| C76 | -5.9847595902 | 0.4389434244  | 0.5766953048  |
| C77 | -5.0623957669 | 1.3732071479  | 1.0488010201  |
| C78 | -4.8194859502 | 2.5618057452  | 0.3422685061  |
| C79 | -5.5692159607 | 2.8251730563  | -0.8172896695 |
| C80 | -6.5036541280 | 1.9000307499  | -1.2789760219 |
| H81 | -7.4273158980 | -0.0274170469 | -0.9608243531 |
| H82 | -6.1493492115 | -0.4855019101 | 1.1258258822  |
| H83 | -4.5077409481 | 1.1758356320  | 1.9606467858  |
| H84 | -5.4388488040 | 3.7656172603  | -1.3448728277 |
| H85 | -7.0830214451 | 2.1199546850  | -2.1727675898 |
| C86 | -1.6299406000 | 4.3979880618  | -2.2611454491 |
| H87 | -1.3956142305 | 3.7757083975  | -3.1299752911 |
| H88 | -0.7045653571 | 4.7383974523  | -1.7943630246 |
| C89 | -1.0613480847 | 6.3965360764  | 2.5314438299  |
| C90 | -0.2946153476 | 6.7319888719  | 1.2007483397  |

|      |               |              |               |
|------|---------------|--------------|---------------|
| C91  | -0.8702267010 | 7.9438843096 | 0.4568711099  |
| H92  | -0.4267349988 | 7.9893823113 | -0.5431865439 |
| H93  | -1.9571947599 | 7.8624371413 | 0.3445906067  |
| H94  | -0.6429360188 | 8.8786521124 | 0.9804422600  |
| C95  | 1.2166857809  | 6.8692600877 | 1.3461435837  |
| H96  | 1.6642693929  | 7.0738670320 | 0.3673692567  |
| H97  | 1.4596711696  | 7.7043048987 | 2.0138863373  |
| H98  | 1.6676578259  | 5.9597740812 | 1.7447035516  |
| C99  | -1.6532894235 | 7.6015618361 | 3.2558160135  |
| H100 | -0.8586477063 | 8.2942986509 | 3.5567276754  |
| H101 | -2.3655890425 | 8.1414934857 | 2.6266620645  |
| H102 | -2.1765052846 | 7.2697093592 | 4.1590852020  |
| C103 | -0.2418147000 | 5.5388608893 | 3.5009094260  |
| H104 | 0.5673525580  | 6.1193818947 | 3.9568077104  |
| H105 | -0.8999613160 | 5.1761193838 | 4.2967627034  |
| H106 | 0.1947780426  | 4.6744498047 | 2.9933099874  |
| B107 | -1.7739519785 | 5.0345819633 | 0.8308449407  |
| O108 | -2.1613299352 | 5.5627060326 | 2.0447175120  |
| O109 | -0.5913316132 | 5.5612701628 | 0.3735957023  |
| H111 | -2.1585402711 | 5.2904097580 | -2.6318528054 |
| N112 | -5.0670655834 | 5.1998262144 | 1.3163268700  |
| H113 | -4.4367657109 | 5.8318534775 | 1.8092225979  |
| H114 | -5.8453761895 | 4.9624140824 | 1.9340291014  |
| H115 | -5.4456948638 | 5.6796206006 | 0.4988459586  |

### Attack at 3-syn

File: PhBPInMeAllyl\_3NH3\_Pd\_PPh3\_2\_thfd.out; structure 51

Solution phase energy: DFT(b3lyp-d3) -3054.13167066818 au

|     |               |               |               |
|-----|---------------|---------------|---------------|
| Pd1 | -1.7823624660 | 1.8379318573  | 0.1670100233  |
| P2  | -0.7716451838 | 1.0126067948  | -1.8999505642 |
| P3  | -0.6838017563 | 0.5720554550  | 1.8847611366  |
| C4  | -2.9996578807 | 3.7855027543  | 0.1618002749  |
| C5  | -3.1094370523 | 3.0455940899  | 1.4017018195  |
| C6  | -4.0111063591 | 3.5628653376  | -0.8136044768 |
| H7  | -3.9765558115 | 2.3786873485  | 1.4286925355  |
| H8  | -4.6998386122 | 2.7397929781  | -0.6315032655 |
| C9  | -3.5181045449 | -0.4971005463 | 5.4054108992  |
| C10 | -2.2298625821 | -0.0420685026 | 5.6912395949  |
| C11 | -1.3589460494 | 0.3122342160  | 4.6587120709  |
| C12 | -1.7734549625 | 0.2237024467  | 3.3245467913  |
| C13 | -3.0806739646 | -0.2092036576 | 3.0462988820  |
| C14 | -3.9439078545 | -0.5789120305 | 4.0772628867  |

|     |               |               |               |
|-----|---------------|---------------|---------------|
| H15 | -4.1900283158 | -0.7785084737 | 6.2128267163  |
| H16 | -1.8969605404 | 0.0375985788  | 6.7231299098  |
| H17 | -0.3624461856 | 0.6645870904  | 4.9023594912  |
| H18 | -3.4253747166 | -0.2529991593 | 2.0153952190  |
| H19 | -4.9492605241 | -0.9217620809 | 3.8436838693  |
| C20 | 3.0837776464  | 2.6969048659  | 3.6058673982  |
| C21 | 2.8686812082  | 1.3393953288  | 3.8672572981  |
| C22 | 1.7451155170  | 0.6939897229  | 3.3486613409  |
| C23 | 0.8166677573  | 1.3984081911  | 2.5607055259  |
| C24 | 1.0478005436  | 2.7541584241  | 2.2919498886  |
| C25 | 2.1709653920  | 3.3993563101  | 2.8160087857  |
| H26 | 3.9609680069  | 3.1982343764  | 4.0093078563  |
| H27 | 3.5779422847  | 0.7796611484  | 4.4736135228  |
| H28 | 1.5959426719  | -0.3635227310 | 3.5509116425  |
| H29 | 0.3607707347  | 3.3037254213  | 1.6590621521  |
| H30 | 2.3341383066  | 4.4527250343  | 2.5999576795  |
| C31 | 0.9645126658  | -3.6239573259 | 0.7057958013  |
| C32 | -0.1801591725 | -3.5371411492 | 1.4990736443  |
| C33 | -0.6775699082 | -2.2905942756 | 1.8869698168  |
| C34 | -0.0330576825 | -1.1109073246 | 1.4846427146  |
| C35 | 1.1260581587  | -1.2091339929 | 0.6975160917  |
| C36 | 1.6180090006  | -2.4541296175 | 0.3100641465  |
| H37 | 1.3482149585  | -4.5957610599 | 0.4028190806  |
| H38 | -0.6901629450 | -4.4419016978 | 1.8240601004  |
| H39 | -1.5656863268 | -2.2478947161 | 2.5090670952  |
| H40 | 1.6532688556  | -0.3120399684 | 0.3928785988  |
| H41 | 2.5147020023  | -2.5073317946 | -0.3027328487 |
| C42 | -1.6812391731 | -3.4419850116 | -2.8974464938 |
| C43 | -1.0637867442 | -2.6345709993 | -3.8594929472 |
| C44 | -0.7962211330 | -1.2926722226 | -3.5841768752 |
| C45 | -1.1372336168 | -0.7364533000 | -2.3370024200 |
| C46 | -1.7718047558 | -1.5510239877 | -1.3880816410 |
| C47 | -2.0380888891 | -2.8946344839 | -1.6632493357 |
| H48 | -1.8879391915 | -4.4880879669 | -3.1129975169 |
| H49 | -0.7922592198 | -3.0490649958 | -4.8281856413 |
| H50 | -0.3332511523 | -0.6739392776 | -4.3487378400 |
| H51 | -2.0486763349 | -1.1348655644 | -0.4251000720 |
| H52 | -2.5205670404 | -3.5117627765 | -0.9091872069 |
| C53 | 3.8499566298  | 1.4244618798  | -1.4349805358 |
| C54 | 3.3373353636  | 0.3506373889  | -2.1710072517 |
| C55 | 1.9592148621  | 0.2094306219  | -2.3525562961 |
| C56 | 1.0700397789  | 1.1419619235  | -1.7946232273 |
| C57 | 1.5931669909  | 2.2215843697  | -1.0613589352 |

|      |               |               |               |
|------|---------------|---------------|---------------|
| C58  | 2.9719355711  | 2.3631082088  | -0.8855346199 |
| H59  | 4.9229985026  | 1.5226314702  | -1.2856896107 |
| H60  | 4.0122015879  | -0.3884047152 | -2.5988244462 |
| H61  | 1.5852887648  | -0.6486409458 | -2.9026525191 |
| H62  | 0.9174820160  | 2.9419241678  | -0.6079524248 |
| H63  | 3.3563759667  | 3.1933518728  | -0.2971396640 |
| C64  | -1.8902250116 | 3.4054454711  | -5.7502330798 |
| C65  | -0.7914355675 | 3.7906248460  | -4.9754934720 |
| C66  | -0.4272233071 | 3.0501671498  | -3.8483591020 |
| C67  | -1.1600279271 | 1.9128134272  | -3.4704184212 |
| C68  | -2.2654368720 | 1.5345548690  | -4.2531948575 |
| C69  | -2.6216682094 | 2.2708473102  | -5.3864782023 |
| H70  | -2.1693920868 | 3.9802639124  | -6.6303698918 |
| H71  | -0.2067731546 | 4.6653381891  | -5.2544466885 |
| H72  | 0.4393110321  | 3.3555922144  | -3.2702591536 |
| H73  | -2.8502437310 | 0.6579482676  | -3.9847751559 |
| H74  | -3.4760954599 | 1.9556322413  | -5.9821973034 |
| C75  | -2.3031342585 | 4.3039954145  | 5.4475248913  |
| C76  | -3.3393989881 | 3.4178760852  | 5.1469836330  |
| C77  | -3.5697946996 | 3.0305312790  | 3.8281529278  |
| C78  | -2.7726879925 | 3.5086058710  | 2.7691369815  |
| C79  | -1.7381918524 | 4.4062202276  | 3.0920337480  |
| C80  | -1.5059178305 | 4.7956611022  | 4.4095105379  |
| H81  | -2.1145973814 | 4.6040222413  | 6.4761816233  |
| H82  | -3.9664364938 | 3.0182344978  | 5.9408750652  |
| H83  | -4.3716582157 | 2.3293856482  | 3.6131265665  |
| H84  | -1.0904280287 | 4.7821835115  | 2.3138938613  |
| H85  | -0.6886463650 | 5.4799255269  | 4.6276979244  |
| C86  | -3.9226819571 | 4.0279492595  | -2.2386388972 |
| H87  | -4.9070355763 | 4.0278448288  | -2.7142149322 |
| H88  | -3.2815376884 | 3.3388400136  | -2.7978186646 |
| C89  | -1.3073109627 | 7.1603262325  | -0.2436471410 |
| C90  | -0.0716950483 | 6.1823147039  | -0.3189201628 |
| C91  | 0.4465130188  | 5.9587005406  | -1.7427123399 |
| H92  | 1.1882487465  | 5.1541441790  | -1.7290300565 |
| H93  | -0.3620097419 | 5.6596002617  | -2.4168725821 |
| H94  | 0.9234557440  | 6.8600941861  | -2.1402802225 |
| C95  | 1.0840839776  | 6.5247680954  | 0.6184672317  |
| H96  | 1.8779695216  | 5.7777768915  | 0.5089006565  |
| H97  | 1.5052454628  | 7.5065396944  | 0.3713219257  |
| H98  | 0.7705701069  | 6.5361829795  | 1.6658600998  |
| C99  | -1.3714500130 | 8.1991341731  | -1.3588242678 |
| H100 | -0.4942868289 | 8.8552011379  | -1.3201501590 |

|      |               |              |               |
|------|---------------|--------------|---------------|
| H101 | -1.4135713783 | 7.7305002430 | -2.3449730661 |
| H102 | -2.2662341303 | 8.8187263655 | -1.2356966290 |
| C103 | -1.4724979531 | 7.8351152929 | 1.1228704259  |
| H104 | -0.6764015952 | 8.5643192398 | 1.3051518433  |
| H105 | -2.4336417161 | 8.3587939367 | 1.1470611261  |
| H106 | -1.4685803929 | 7.1011161897 | 1.9349601958  |
| B107 | -2.0152292046 | 4.9901160154 | -0.0425372377 |
| O108 | -2.4432211709 | 6.2449545917 | -0.3929377525 |
| O109 | -0.6515424833 | 4.9095384849 | 0.1139401636  |
| H111 | -3.4886390659 | 5.0279217068 | -2.3139582472 |
| N112 | -5.5667529174 | 5.0000022816 | -0.2181204805 |
| H113 | -5.0685339671 | 5.8885507610 | -0.1835511344 |
| H114 | -5.9082071691 | 4.7969158344 | 0.7215125852  |
| H115 | -6.3784893545 | 5.1109734565 | -0.8275491556 |

### Attack at 3-*anti*

File: PhBPin\_antiMeAllyl\_3NH3\_Pd\_PPh3\_2\_thfd.out; structure 61

Solution phase energy: DFT(b3lyp-d3) -3054.13375710818 au

|     |               |               |               |
|-----|---------------|---------------|---------------|
| Pd1 | -1.7394289045 | 1.8631914230  | 0.3374056714  |
| P2  | -0.7025605205 | 1.2151496128  | -1.7680716260 |
| P3  | -0.7070326722 | 0.4225440212  | 1.9412434520  |
| C4  | -3.0886333688 | 3.7146019517  | 0.4094761358  |
| C5  | -2.9585800071 | 3.0920382663  | 1.7088671554  |
| C6  | -4.1917159276 | 3.3734209709  | -0.4261445211 |
| H7  | -3.7465101818 | 2.3801430101  | 1.9495873972  |
| H8  | -4.1211481146 | 3.7125778513  | -1.4543571208 |
| C9  | -3.8183496365 | -0.8326866865 | 5.1606474210  |
| C10 | -2.5112479801 | -0.5400229755 | 5.5577612474  |
| C11 | -1.5550607288 | -0.1591379813 | 4.6131854711  |
| C12 | -1.8997375788 | -0.0589434252 | 3.2581071490  |
| C13 | -3.2178788038 | -0.3486146307 | 2.8675260361  |
| C14 | -4.1698765719 | -0.7408964726 | 3.8099008974  |
| H15 | -4.5605206273 | -1.1273433320 | 5.8993705604  |
| H16 | -2.2330303591 | -0.6034925072 | 6.6078344232  |
| H17 | -0.5481470429 | 0.0757337171  | 4.9432222328  |
| H18 | -3.5028031771 | -0.2580003117 | 1.8208345493  |
| H19 | -5.1855783174 | -0.9668648281 | 3.4920193239  |
| C20 | 2.8515694476  | 2.4084468997  | 4.1641922866  |
| C21 | 2.6908200750  | 1.0203487380  | 4.2211733460  |
| C22 | 1.6329106908  | 0.4098173348  | 3.5479148529  |
| C23 | 0.7219670170  | 1.1830503853  | 2.8071378584  |
| C24 | 0.9003631176  | 2.5713916089  | 2.7428410735  |

|     |               |               |               |
|-----|---------------|---------------|---------------|
| C25 | 1.9546199657  | 3.1806580324  | 3.4242914292  |
| H26 | 3.6762164053  | 2.8830353451  | 4.6918518310  |
| H27 | 3.3899764832  | 0.4110503101  | 4.7900669886  |
| H28 | 1.5230120950  | -0.6704637577 | 3.5933112186  |
| H29 | 0.2163684547  | 3.1792178468  | 2.1619533323  |
| H30 | 2.0737207336  | 4.2604943209  | 3.3741400159  |
| C31 | 1.0070507226  | -3.6589352678 | 0.4709404022  |
| C32 | -0.2133676536 | -3.6258211673 | 1.1501917999  |
| C33 | -0.7294165024 | -2.4151324094 | 1.6198893415  |
| C34 | -0.0299092439 | -1.2148531464 | 1.4153412906  |
| C35 | 1.2033559401  | -1.2592992917 | 0.7437590919  |
| C36 | 1.7145108158  | -2.4694632489 | 0.2749822421  |
| H37 | 1.4066350109  | -4.6023276129 | 0.1053201318  |
| H38 | -0.7678841972 | -4.5461415205 | 1.3227539016  |
| H39 | -1.6772756287 | -2.4167400971 | 2.1498558807  |
| H40 | 1.7748400433  | -0.3498902308 | 0.5954121688  |
| H41 | 2.6702821644  | -2.4788002068 | -0.2440102181 |
| C42 | -1.7048043489 | -3.0339076271 | -3.3651593156 |
| C43 | -1.1176565403 | -2.0999238856 | -4.2251464747 |
| C44 | -0.8239139008 | -0.8141140945 | -3.7685469439 |
| C45 | -1.1088758497 | -0.4501787820 | -2.4407515224 |
| C46 | -1.7153631499 | -1.3875671630 | -1.5929395053 |
| C47 | -2.0056087255 | -2.6744927658 | -2.0496454207 |
| H48 | -1.9310787456 | -4.0364190215 | -3.7228427940 |
| H49 | -0.8896189779 | -2.3722712238 | -5.2538105071 |
| H50 | -0.3758602341 | -0.0939588609 | -4.4484539518 |
| H51 | -1.9500990993 | -1.1126018132 | -0.5703640465 |
| H52 | -2.4636136787 | -3.3946726951 | -1.3757419124 |
| C53 | 3.8901723953  | 1.2946918095  | -1.0079464208 |
| C54 | 3.3643577417  | 0.3303224229  | -1.8732345457 |
| C55 | 1.9928077715  | 0.2933763862  | -2.1416767390 |
| C56 | 1.1287498612  | 1.2258728761  | -1.5482489863 |
| C57 | 1.6664783272  | 2.2012726062  | -0.6900960847 |
| C58 | 3.0359205384  | 2.2335737041  | -0.4207499682 |
| H59 | 4.9556160317  | 1.3106452777  | -0.7885536293 |
| H60 | 4.0213996680  | -0.4049466606 | -2.3334726878 |
| H61 | 1.6001517249  | -0.4815249472 | -2.7932780722 |
| H62 | 1.0079142035  | 2.9227981883  | -0.2131929726 |
| H63 | 3.4320392239  | 2.9796553211  | 0.2641220423  |
| C64 | -1.4457152268 | 3.9820324639  | -5.4462142726 |
| C65 | -0.1485656699 | 3.5387892446  | -5.1742028985 |
| C66 | 0.0980524051  | 2.7019023738  | -4.0818425405 |
| C67 | -0.9525676943 | 2.3004956940  | -3.2438218458 |

|      |               |              |               |
|------|---------------|--------------|---------------|
| C68  | -2.2554687415 | 2.7346012014 | -3.5357526360 |
| C69  | -2.5027419264 | 3.5676117337 | -4.6279396961 |
| H70  | -1.6342966722 | 4.6395501254 | -6.2917735526 |
| H71  | 0.6790276784  | 3.8494709262 | -5.8084303293 |
| H72  | 1.1140362630  | 2.3767847797 | -3.8769143763 |
| H73  | -3.0808116653 | 2.4126864705 | -2.9056457987 |
| H74  | -3.5183078783 | 3.8964686123 | -4.8397870301 |
| C75  | -1.4641486652 | 4.6673872789 | 5.4436729427  |
| C76  | -2.2532081087 | 3.5153409545 | 5.3905241816  |
| C77  | -2.7203201534 | 3.0380851327 | 4.1673831976  |
| C78  | -2.4015133580 | 3.6789531491 | 2.9522180542  |
| C79  | -1.6169656066 | 4.8479644076 | 3.0274223441  |
| C80  | -1.1585309151 | 5.3312583509 | 4.2521005608  |
| H81  | -1.0985231374 | 5.0446473842 | 6.3959419312  |
| H82  | -2.5114982789 | 2.9851196506 | 6.3043598913  |
| H83  | -3.3394128062 | 2.1458364040 | 4.1494712821  |
| H84  | -1.3272158282 | 5.3671322176 | 2.1266776239  |
| H85  | -0.5511079934 | 6.2342353276 | 4.2746952122  |
| C86  | -5.1836186502 | 2.2630556904 | -0.1922617553 |
| H87  | -6.0395840126 | 2.3669592916 | -0.8642110666 |
| H88  | -5.5506673239 | 2.2425000745 | 0.8379037694  |
| C89  | -1.7027877416 | 6.9319870941 | -1.0218693834 |
| C90  | -0.3727489694 | 6.1168232837 | -0.7886123766 |
| C91  | 0.2025654383  | 5.5260388805 | -2.0760892515 |
| H92  | 0.9993840739  | 4.8188653317 | -1.8267793926 |
| H93  | -0.5614170373 | 4.9836439799 | -2.6361904861 |
| H94  | 0.6214356444  | 6.3075360965 | -2.7183051058 |
| C95  | 0.7117558314  | 6.8536624076 | -0.0065795950 |
| H96  | 1.5794339619  | 6.1973090900 | 0.1201679837  |
| H97  | 1.0379610477  | 7.7480043005 | -0.5500110119 |
| H98  | 0.3669959298  | 7.1561900742 | 0.9856908095  |
| C99  | -1.8390690097 | 7.5622396667 | -2.4050665709 |
| H100 | -1.0321626912 | 8.2834551078 | -2.5791343756 |
| H101 | -1.8108639632 | 6.8056912611 | -3.1937872981 |
| H102 | -2.7941832501 | 8.0953656406 | -2.4742402395 |
| C103 | -1.9801018956 | 7.9700485539 | 0.0727605955  |
| H104 | -1.2714665348 | 8.8029635965 | 0.0195924426  |
| H105 | -2.9922806246 | 8.3692116845 | -0.0571271915 |
| H106 | -1.9177933103 | 7.5233909093 | 1.0716902962  |
| B107 | -2.1911745722 | 4.8722136881 | -0.1451541963 |
| O108 | -2.7332101280 | 5.9003546015 | -0.8800929797 |
| O109 | -0.8340240762 | 4.9885282618 | 0.0224430615  |
| H111 | -4.7061975721 | 1.2967755288 | -0.3994512982 |



|      |               |              |               |
|------|---------------|--------------|---------------|
| N112 | -5.6006144253 | 5.0395228639 | -0.1448804010 |
| H113 | -4.9969818630 | 5.8403915928 | -0.3286008457 |
| H114 | -5.9374014054 | 5.0980849435 | 0.8170680520  |
| H115 | -6.4088679973 | 5.0900745697 | -0.7678788126 |

## 5. References

- (1) Brown, H. C.; Sinclair, J. A. *J. Organomet. Chem.* **1977**, *131*, 163.
- (2) Brown, H. C.; Bhat, N. G.; Srebnik, M. *Tetrahedron Lett.* **1988**, *29*, 2631.
- (3) Hussain, M. M.; Walsh, P. J. *Angew. Chem. Int. Ed.* **2010**, *49*, 1834.
- (4) Hoshi, M.; Shirakawa, K. *Tetrahedron Lett.* **2000**, *41*, 2595.
- (5) Kerrigan, M. H.; Jeon, S.-J.; Chen, Y. K.; Salvi, L.; Carroll, P. J.; Walsh, P. J. *J. Am. Chem. Soc.* **2009**, *131*, 8434.
- (6) Nudelman, N. S.; Garcia, G. V. *J. Org. Chem.* **2001**, *66*, 1387.
- (7) Jaguar, v., Schrodinger, LLC, New York, NY, 2011. For the most recent version, see: <http://www.schrodinger.com>
- (8) Becke, A. D. *J. Chem. Phys.* **1993**, *98*, 5648.
- (9) Lee, C. T.; Yang, W. T.; Parr, G. *Phys. Rev. B* **1988**, *37*, 785.
- (10) Stephens, P. J.; Devlin, F. J.; Chabalowski, C. F.; Frisch, M. J. *J. Phys. Chem* **1994**, *98*, 11623.
- (11) Grimme, S.; Antony, J.; Ehrlich, S.; Krieg, H. *J. Chem. Phys.* **2010**, *132*, 154104.
- (12) Hay, P. J.; Wadt, W. R. *J. Chem. Phys.* **1985**, *82*, 299.
- (13) Tannor, D. J.; Marten, B.; Murphy, R.; Friesner, R. A.; Sitkoff, D.; Nicholls, A.; Honig, B.; Ringnalda, M.; Goddard, I. I. W. A. *J. Am. Chem. Soc.* **1994**, *116*, 11875.
- (14) Marten, B.; Kim, K.; Cortis, C.; Friesner, R. A.; Murphy, R. B.; Ringnalda, M. N.; Sitkoff, D.; Honig, B. *J. Chem. Phys.* **1996**, *100*, 11775.

## 6. $^1\text{H}$ and $^{13}\text{C}\{^1\text{H}\}$ NMR Spectra

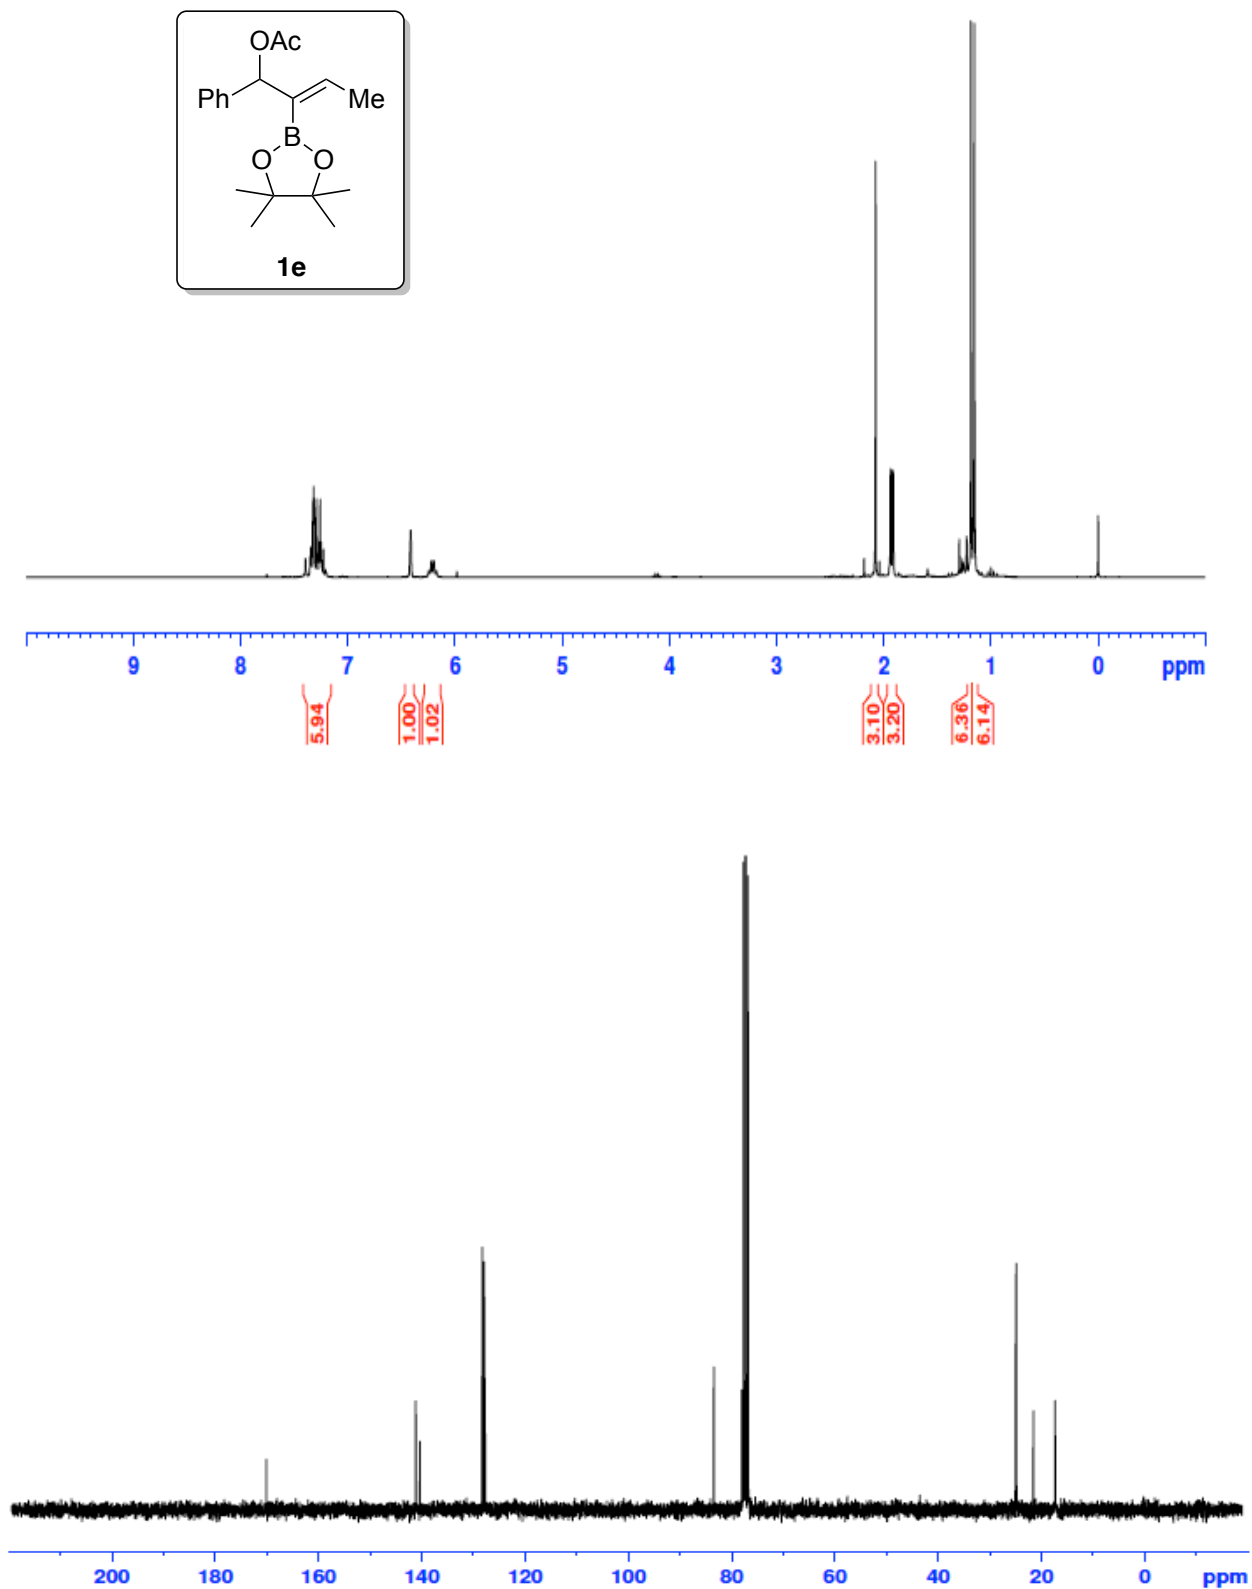

**Figure A- 1.** 300 MHz  $^1\text{H}$  and 75 MHz  $^{13}\text{C}\{^1\text{H}\}$  NMR of *(E)*-1-phenyl-2-(4,4,5,5-tetramethyl-1,3,2-dioxaborolan-2-yl)but-2-en-1-yl acetate in  $\text{CDCl}_3$ .

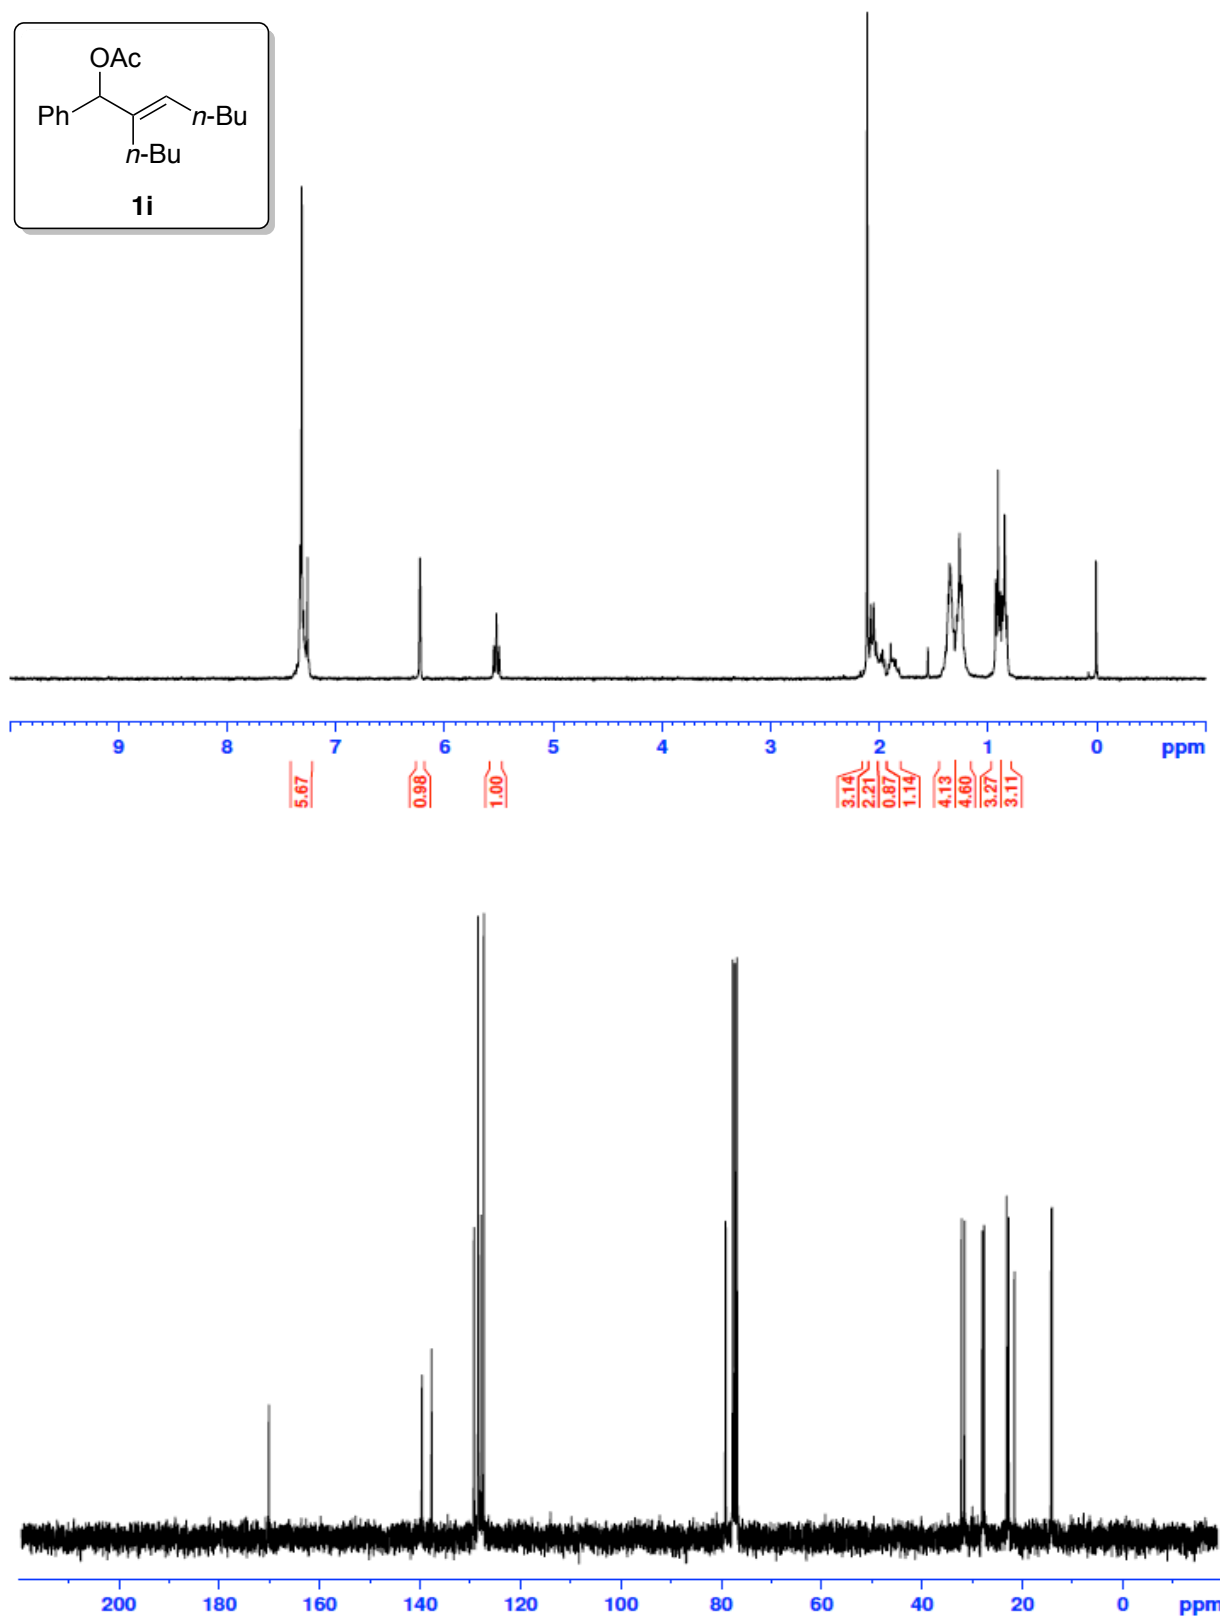

**Figure A- 2.** 300 MHz <sup>1</sup>H and 75 MHz <sup>13</sup>C{<sup>1</sup>H} NMR of (*E*)-2-butyl-1-phenylhept-2-en-1-yl acetate in CDCl<sub>3</sub>.

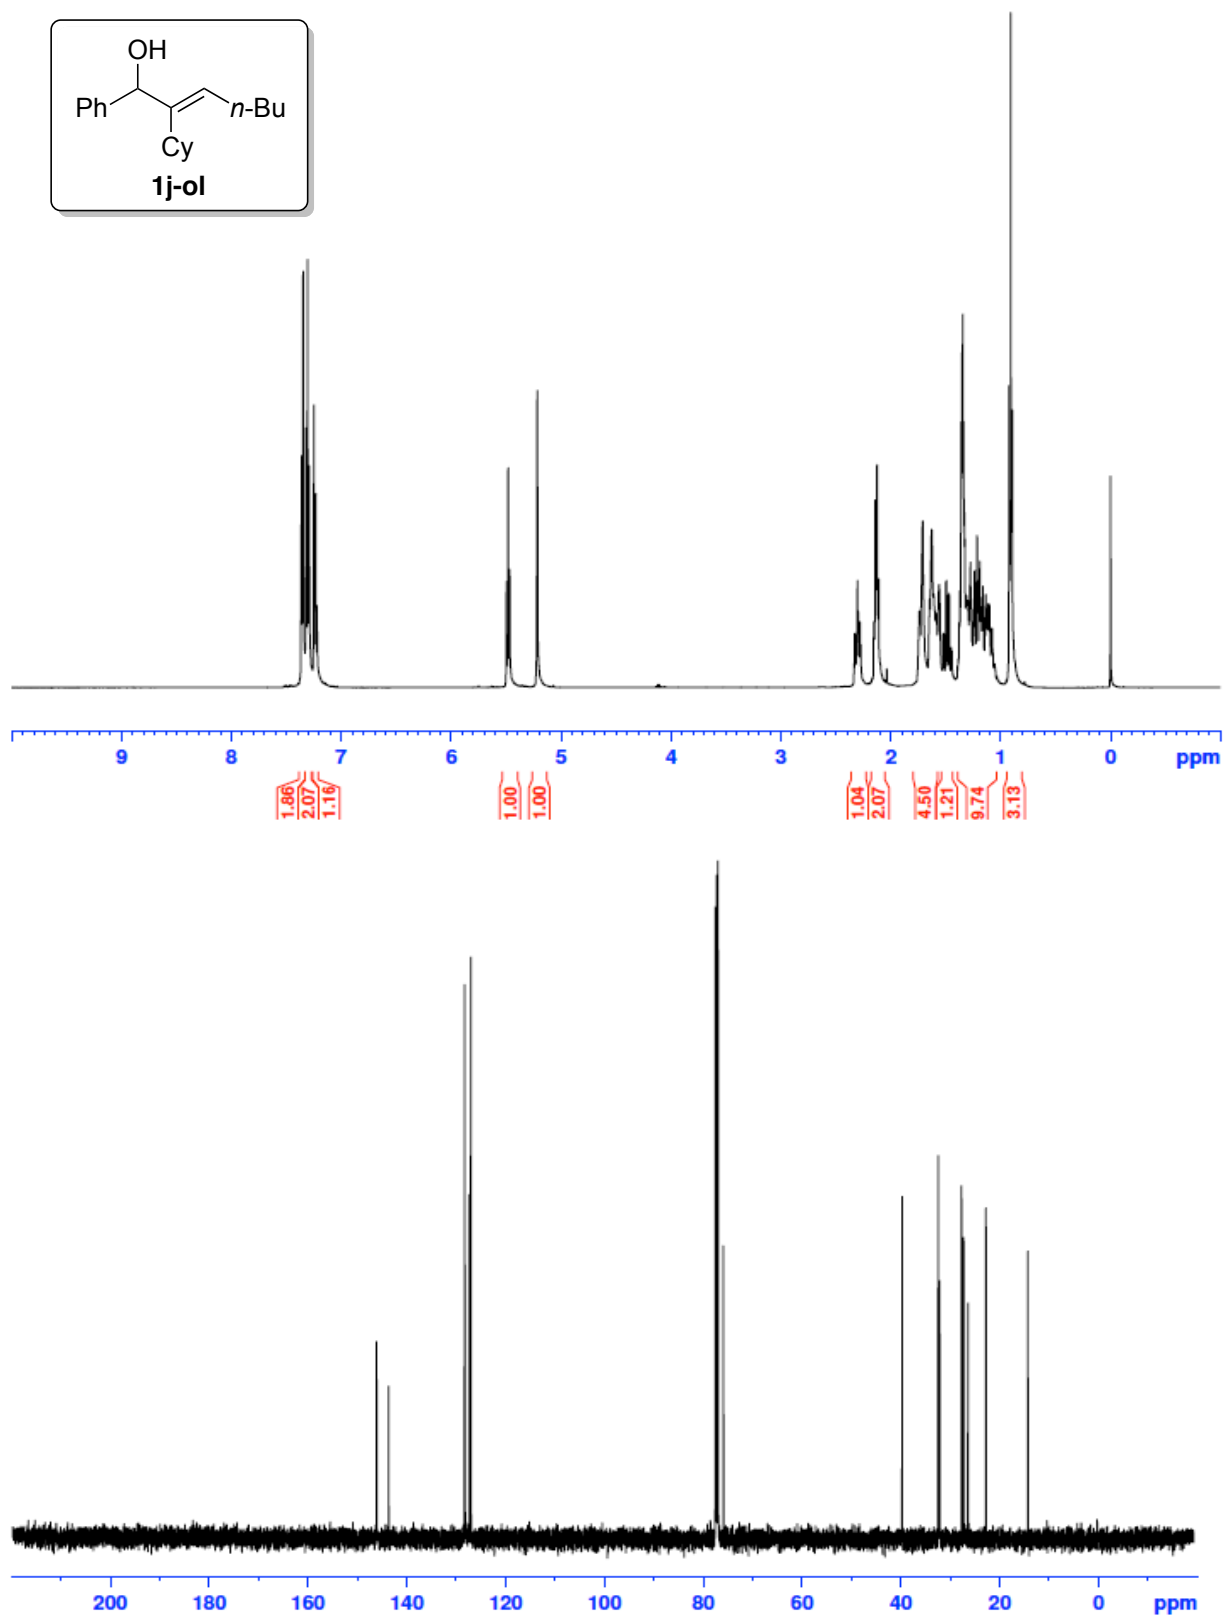

**Figure A- 3.** 500 MHz <sup>1</sup>H and 125 MHz <sup>13</sup>C{<sup>1</sup>H} NMR of (*E*)-2-cyclohexyl-1-phenylhept-2-en-1-ol in CDCl<sub>3</sub>.

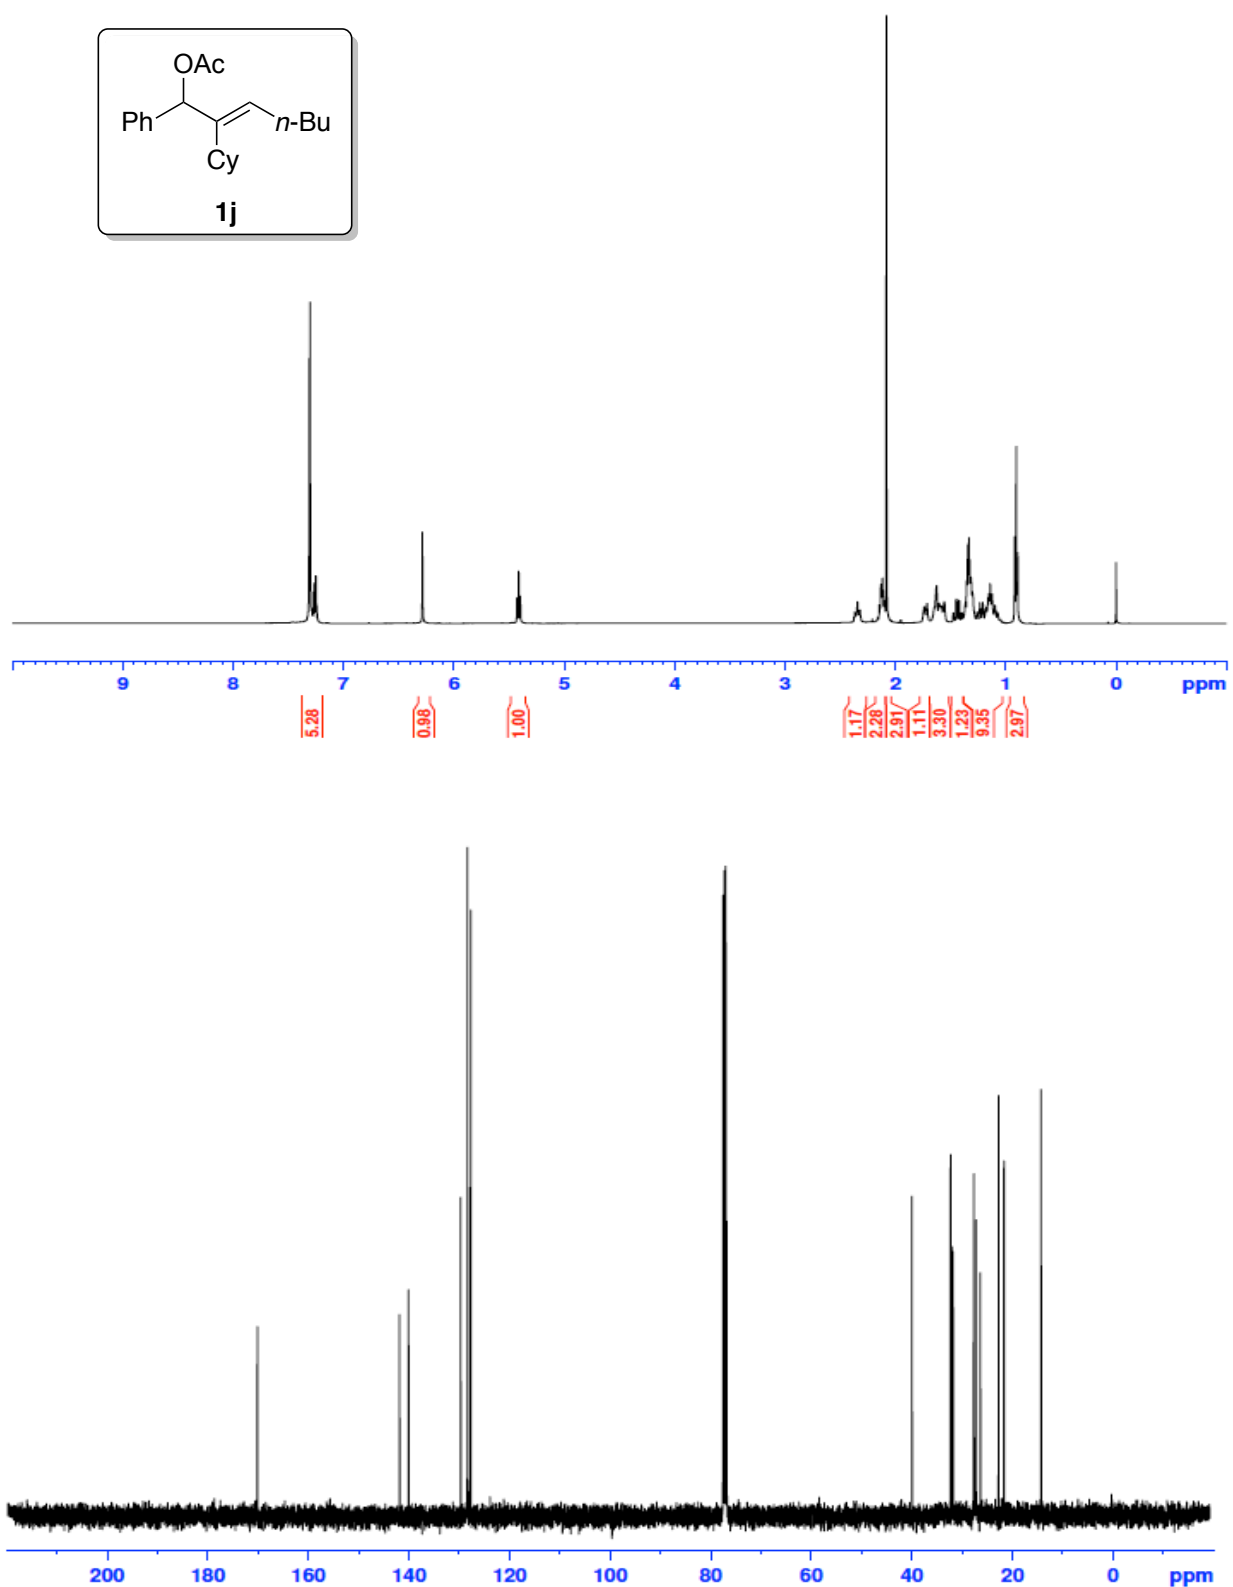

**Figure A- 4.** 500 MHz <sup>1</sup>H and 125 MHz <sup>13</sup>C{<sup>1</sup>H} NMR of (*E*)-2-cyclohexyl-1-phenylhept-2-en-1-yl acetate in CDCl<sub>3</sub>.

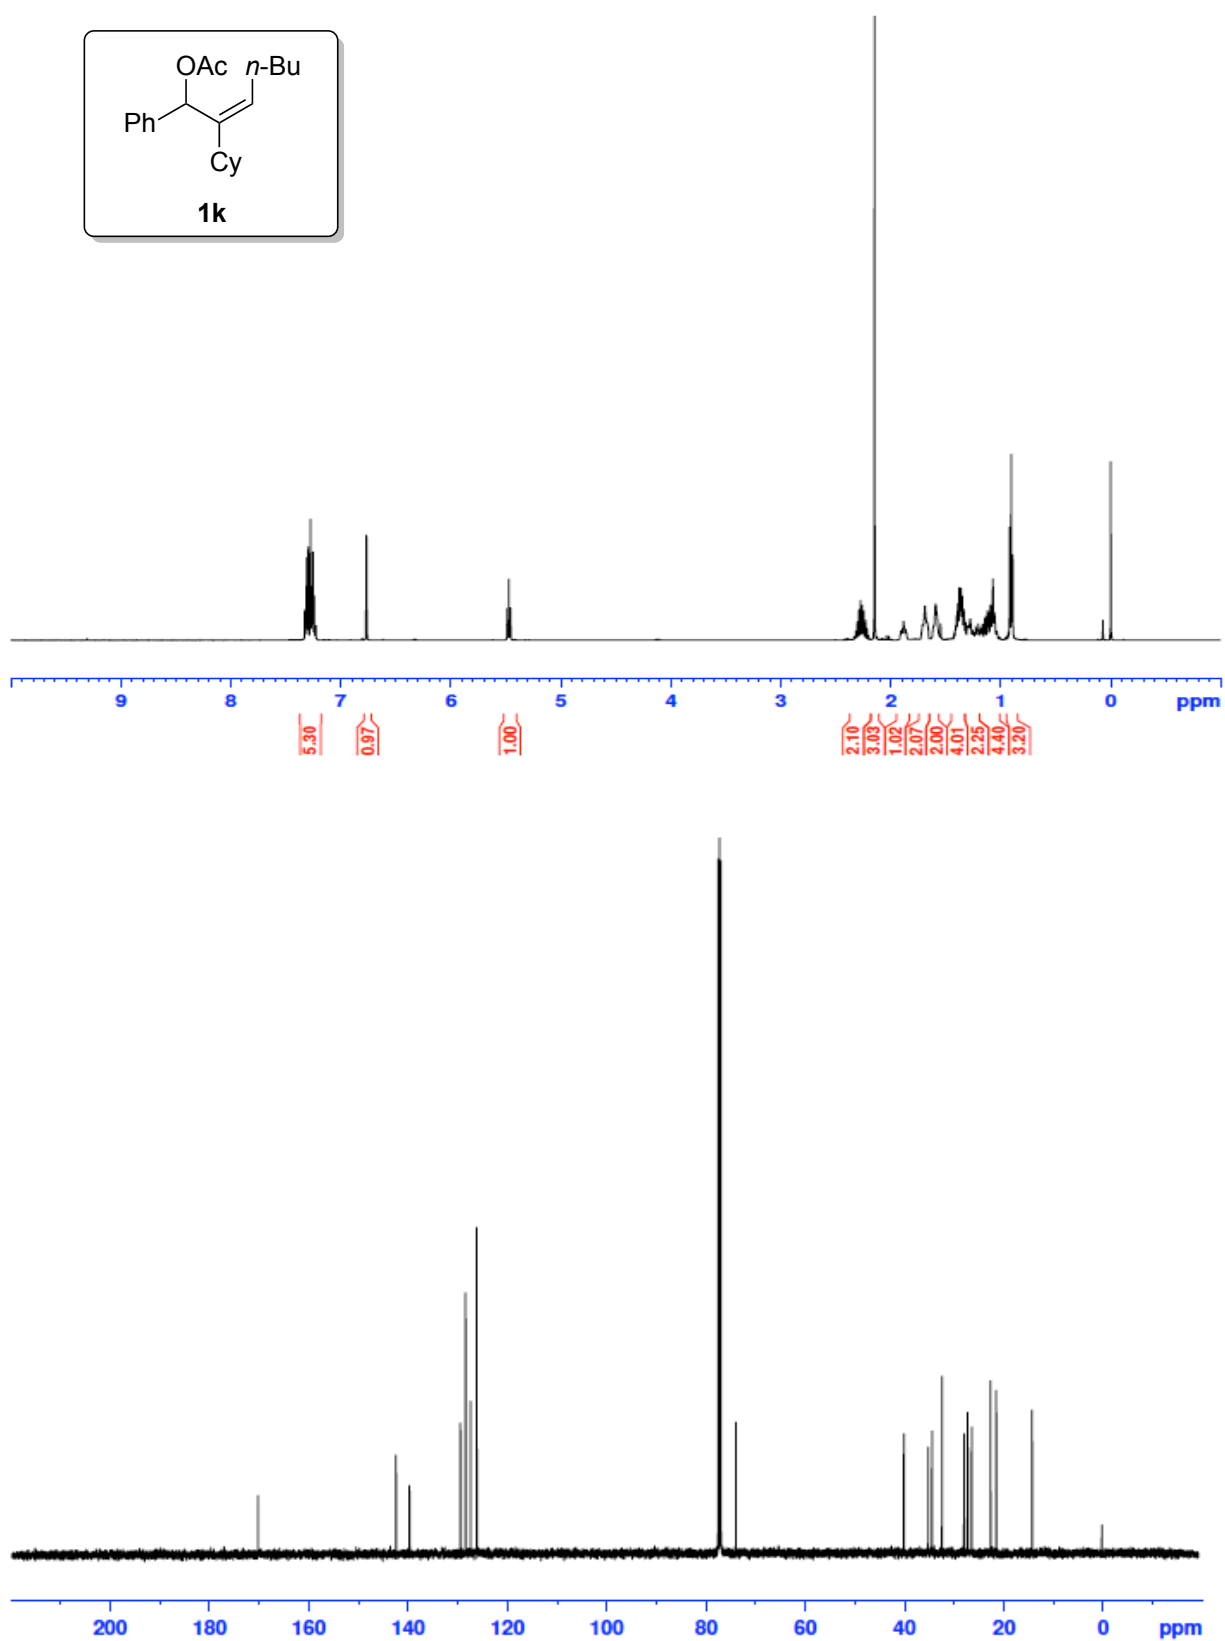

**Figure A- 5.** 500 MHz <sup>1</sup>H and 125 MHz <sup>13</sup>C{<sup>1</sup>H} NMR of (Z)-2-cyclohexyl-1-phenylhept-2-en-1-yl acetate in CDCl<sub>3</sub>.

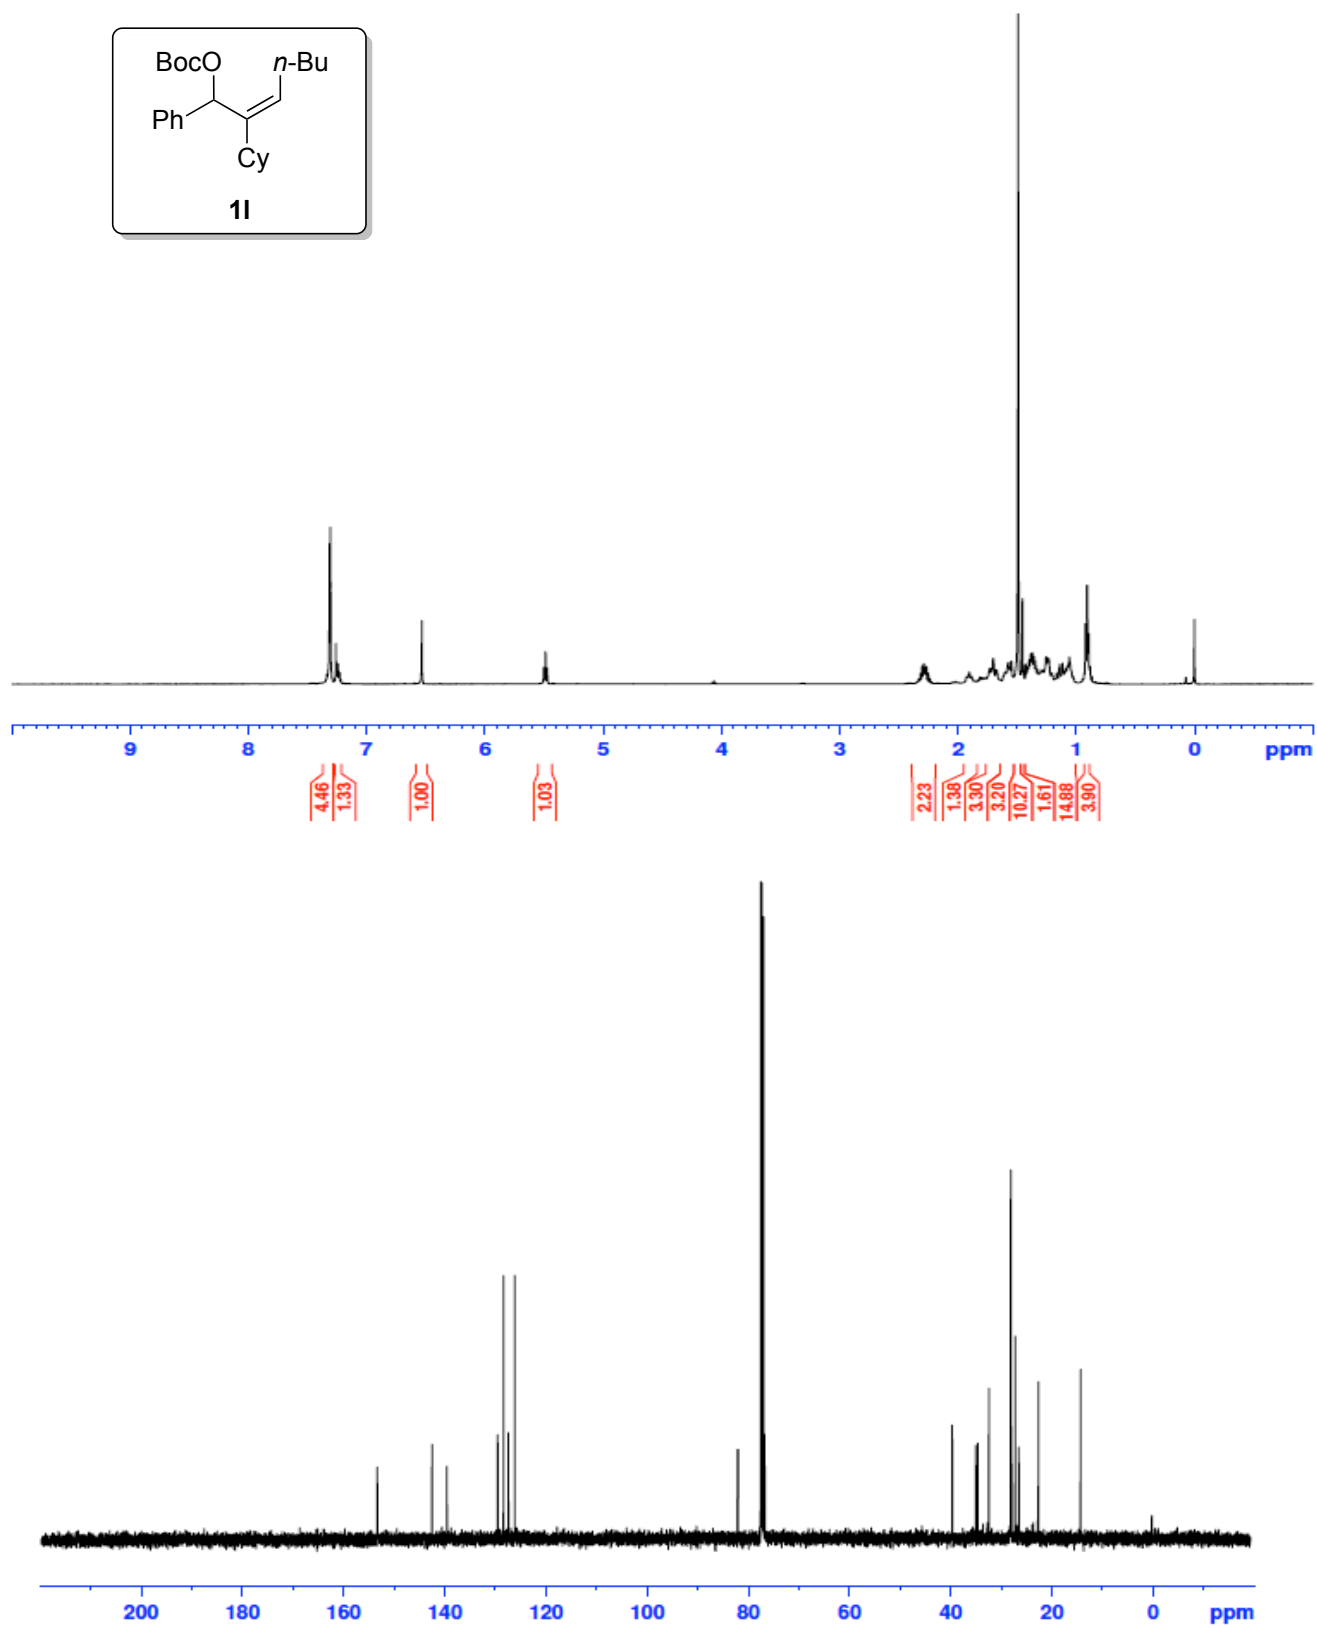

**Figure A- 6.** 500 MHz <sup>1</sup>H and 125 MHz <sup>13</sup>C{<sup>1</sup>H} NMR of (Z)-tert-butyl (2-cyclohexyl-1-phenylhept-2-en-1-yl) carbonate in CDCl<sub>3</sub>.

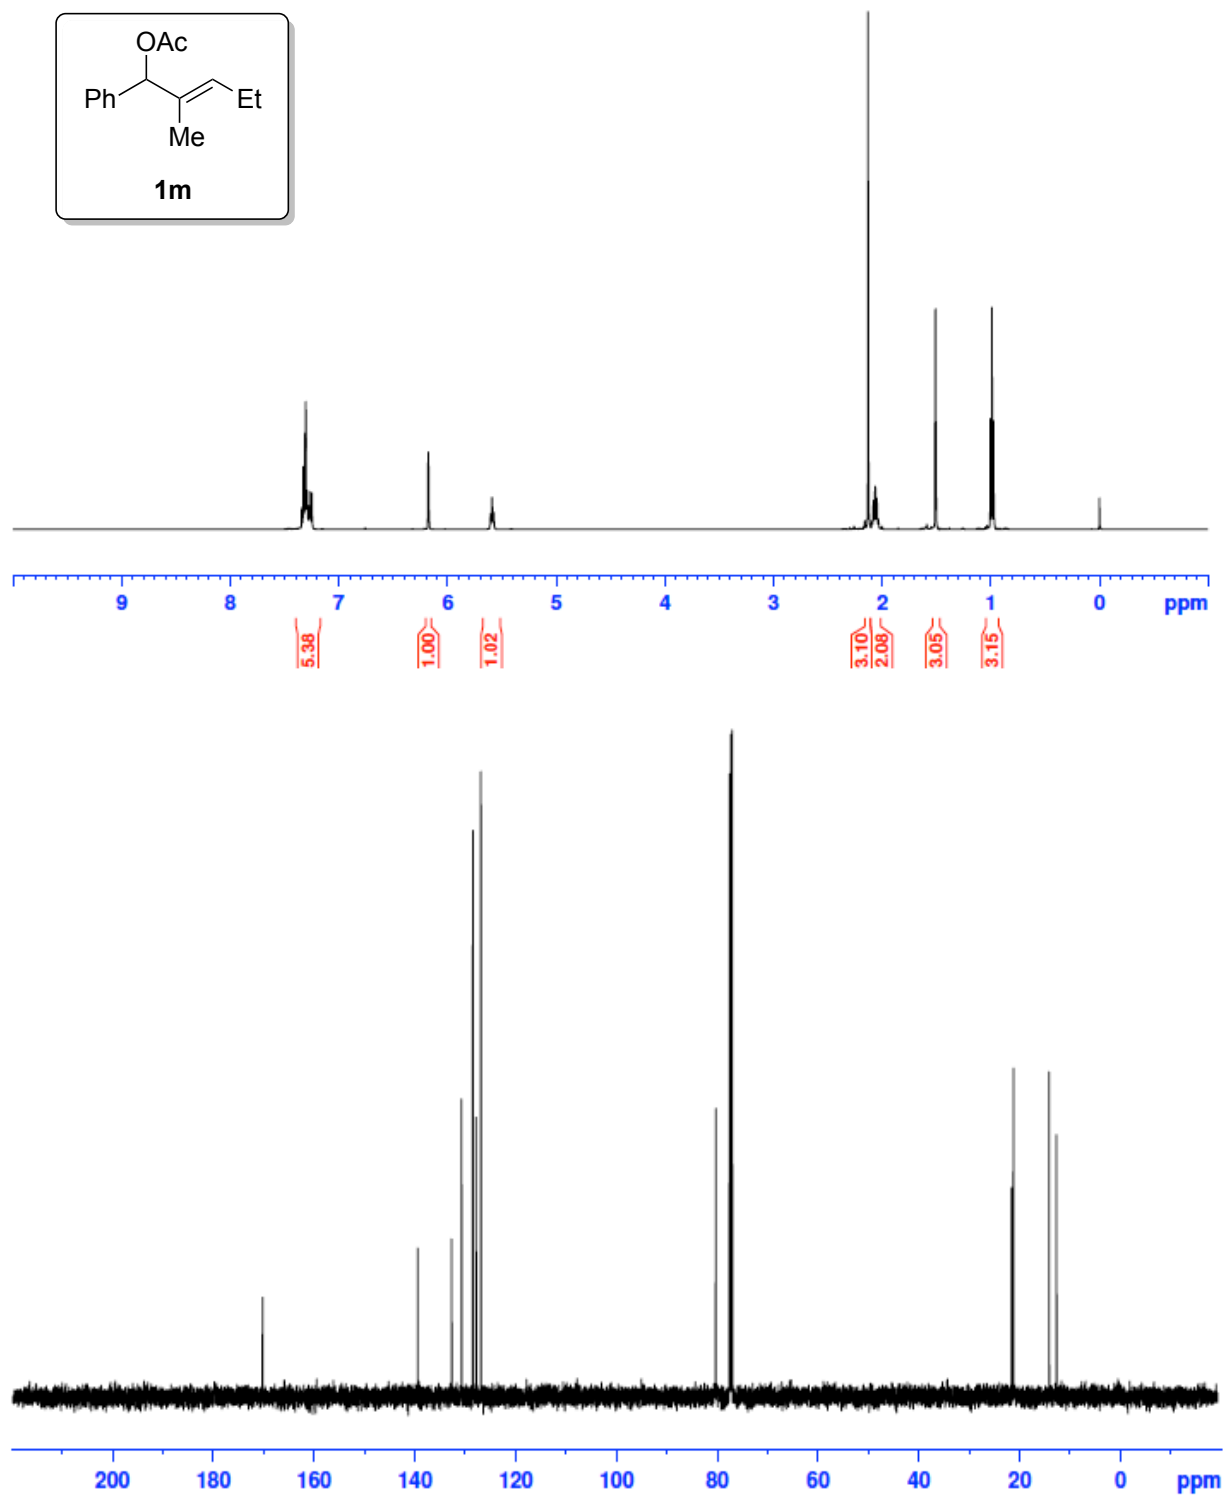

**Figure A- 7.** 500 MHz  $^1\text{H}$  and 125 MHz  $^{13}\text{C}\{^1\text{H}\}$  NMR of *(E)*-2-methyl-1-phenylpent-2-en-1-yl acetate in  $\text{CDCl}_3$ .



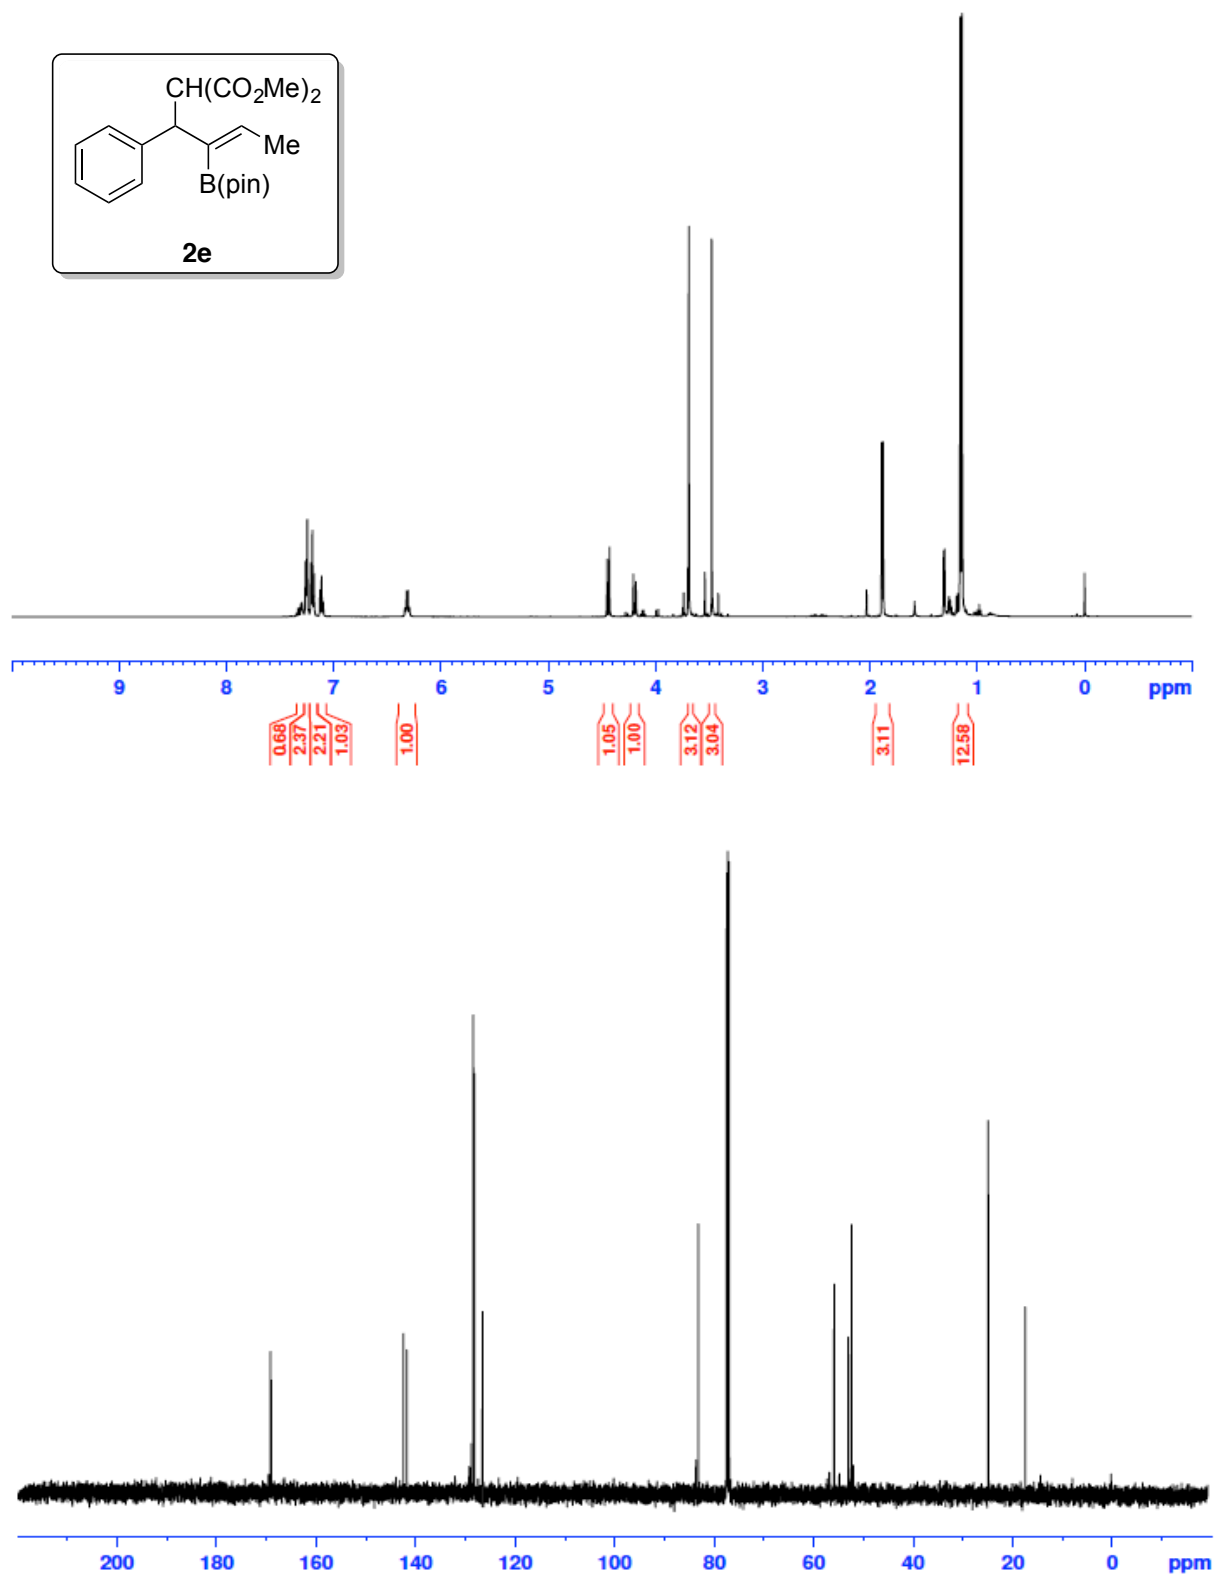

**Figure A- 8.** 500 MHz <sup>1</sup>H and 125 MHz <sup>13</sup>C{<sup>1</sup>H} NMR of dimethyl (*E*)-2-(1-phenyl-2-(4,4,5,5-tetramethyl-1,3,2-dioxaborolan-2-yl)but-2-en-1-yl)malonate in CDCl<sub>3</sub>. (Residual ethyl acetate solvent (~5%) peak is seen.)

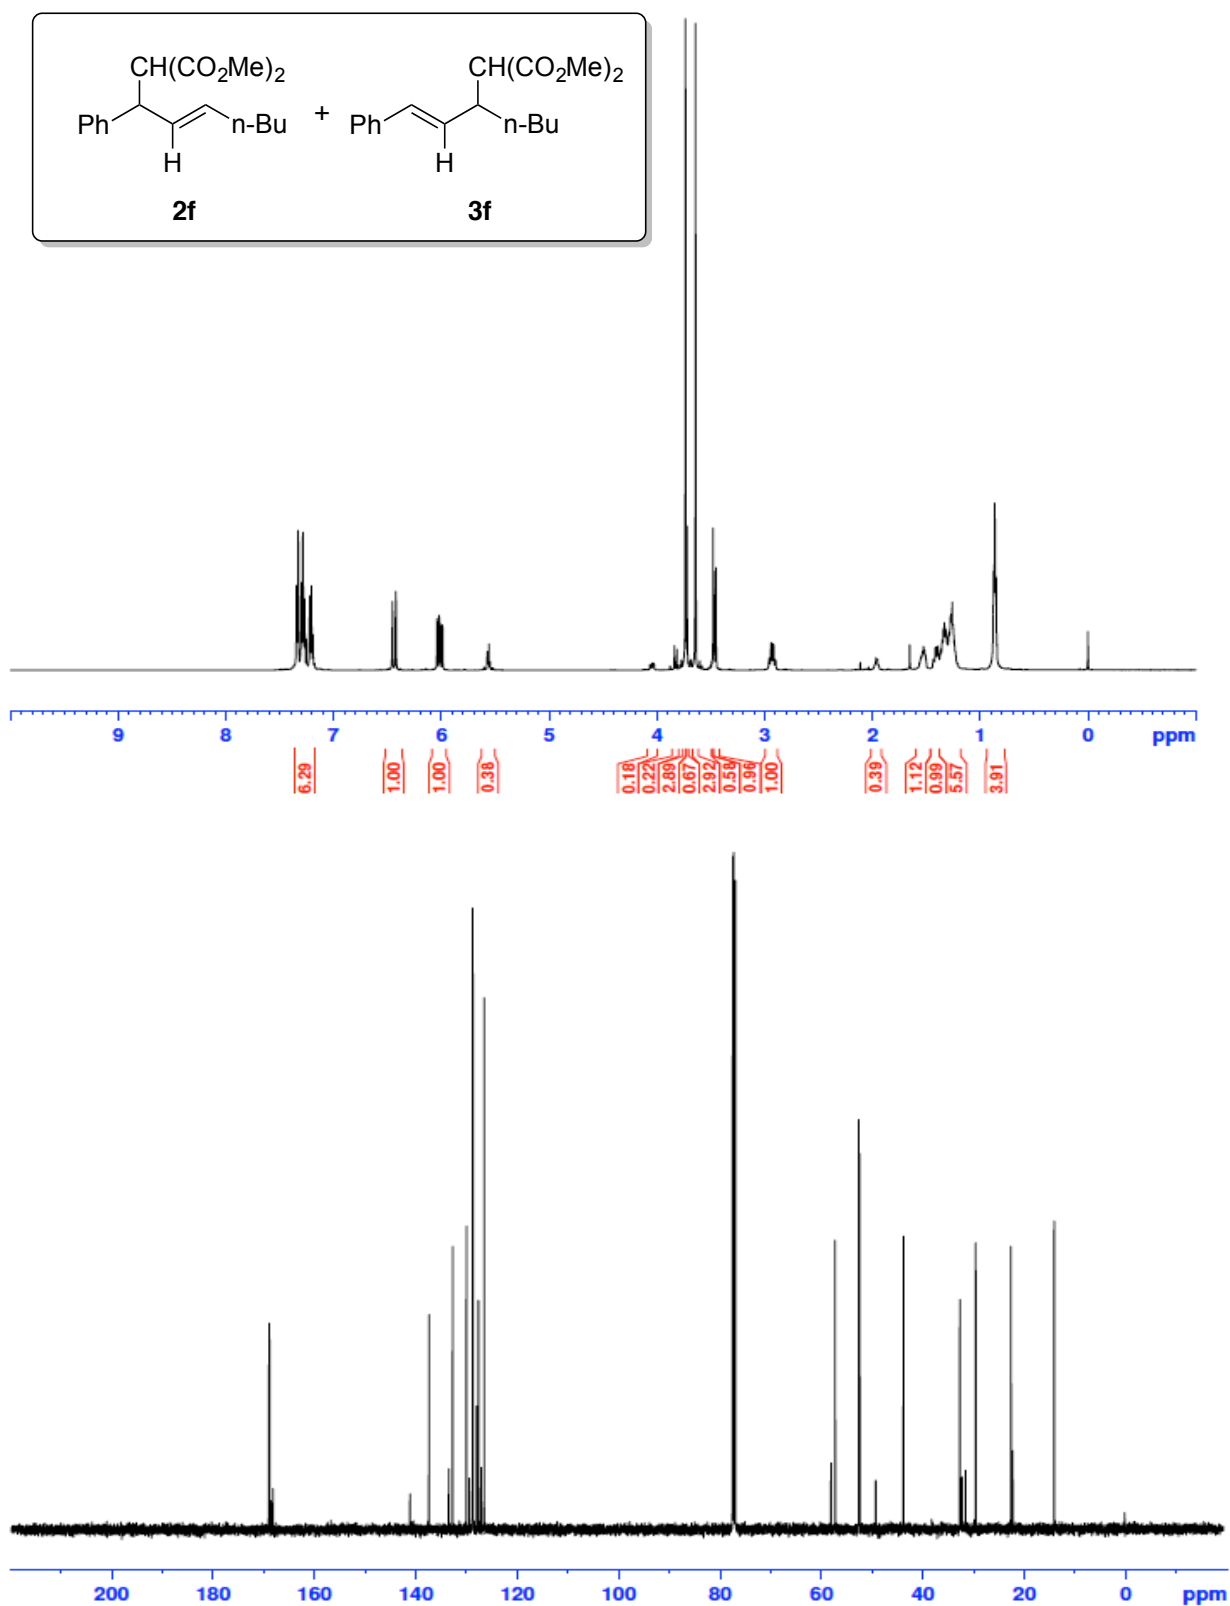

**Figure A- 9.** 500 MHz <sup>1</sup>H and 125 MHz <sup>13</sup>C{<sup>1</sup>H} of dimethyl (*E*)-2-(1-phenylhept-2-en-1-yl)malonate (minor) and dimethyl (*E*)-2-(1-phenylhept-1-en-3-yl)malonate (major) in CDCl<sub>3</sub>.

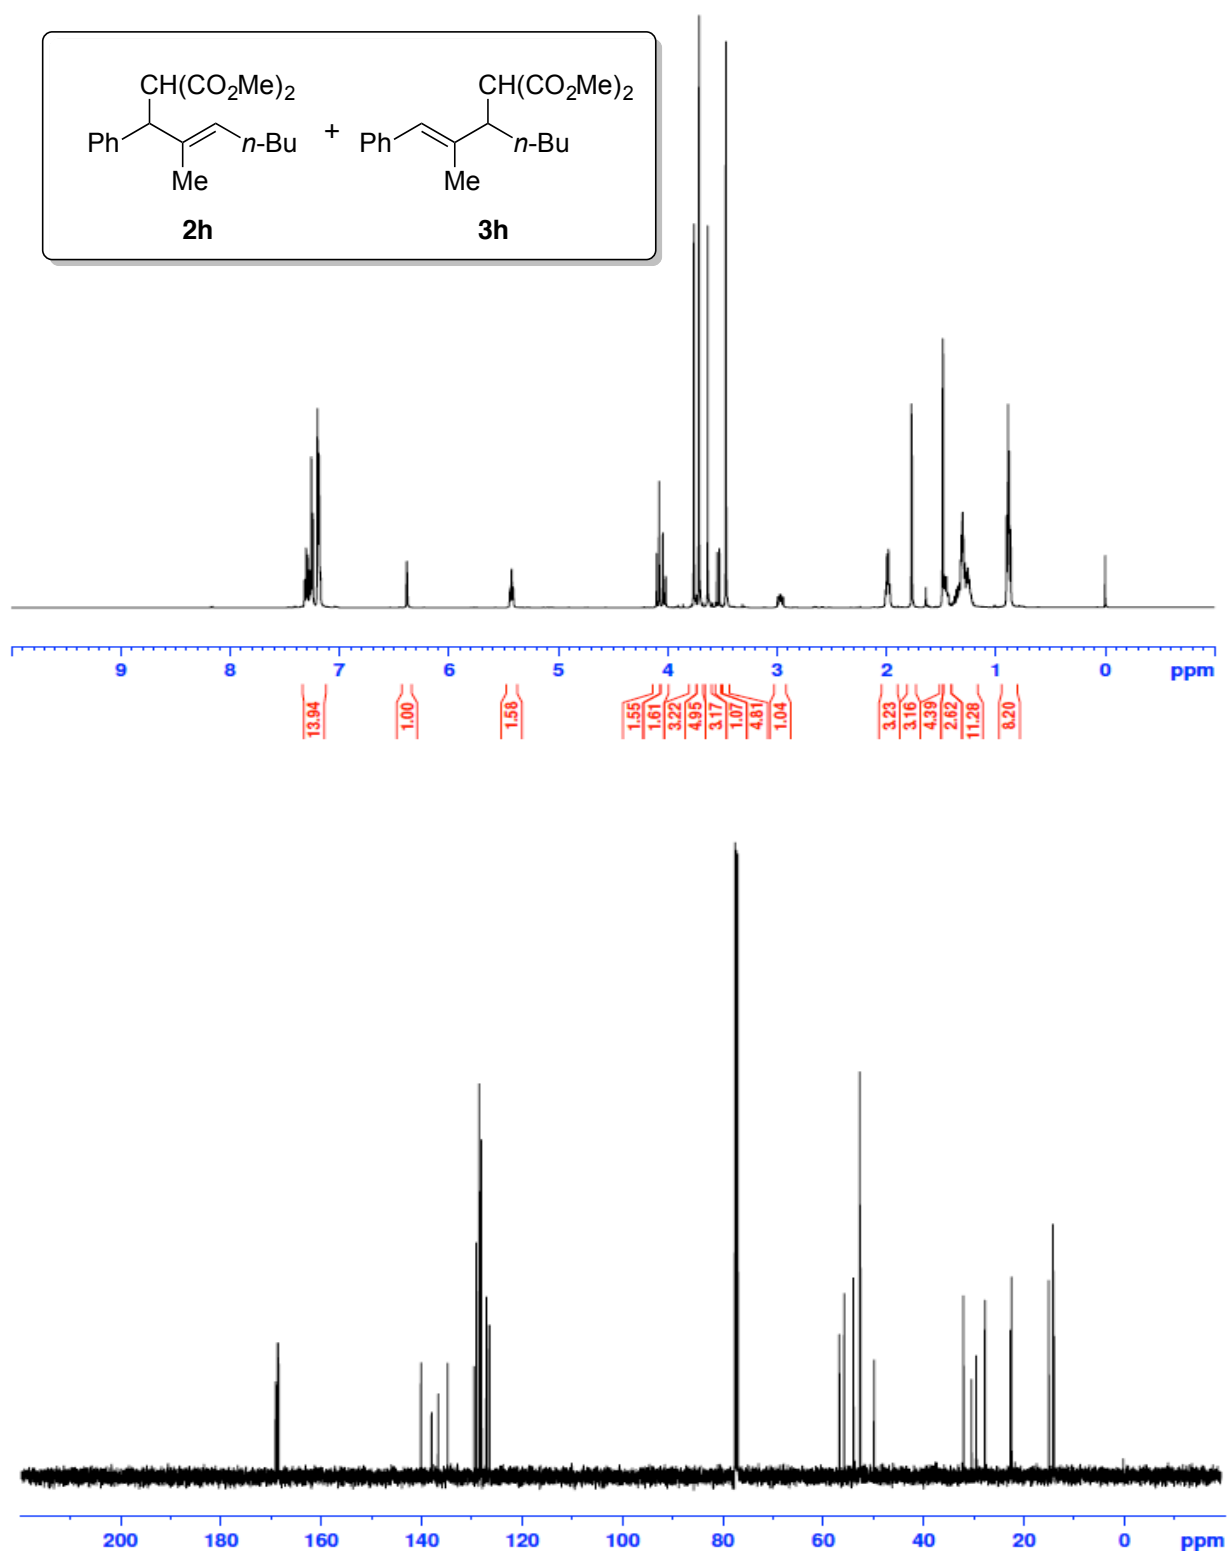

**Figure A- 10.** 500 MHz <sup>1</sup>H and 125 MHz <sup>13</sup>C{<sup>1</sup>H} of dimethyl (*E*)-2-(2-methyl-1-phenylhept-2-en-1-yl)malonate (major) and dimethyl (*E*)-2-(2-methyl-1-phenylhept-1-en-3-yl)malonate (minor) in CDCl<sub>3</sub>.

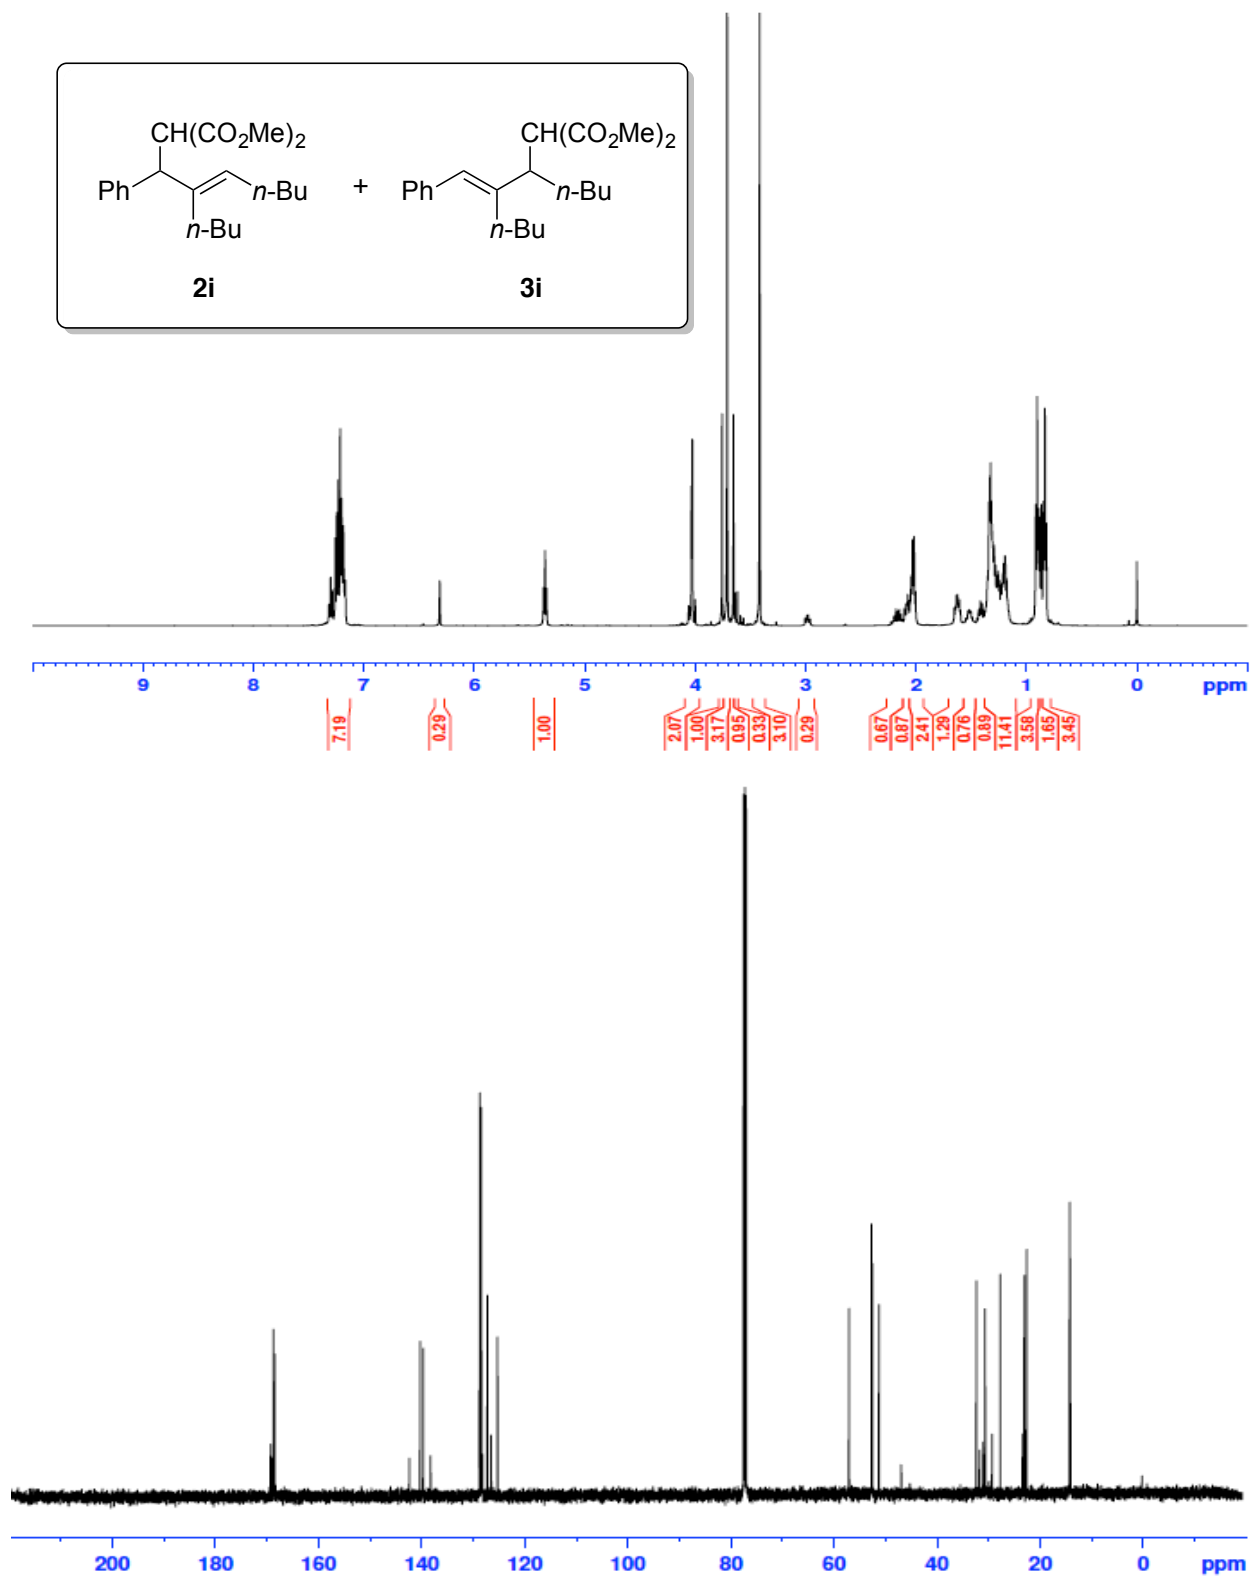

**Figure A- 11.** 500 MHz <sup>1</sup>H and 125 MHz <sup>13</sup>C{<sup>1</sup>H} of dimethyl (*E*)-2-(2-butyl-1-phenylhept-2-en-1-yl)malonate (major) and dimethyl (*E*)-2-(6-benzylidenedecan-5-yl)malonate (minor) in CDCl<sub>3</sub>.

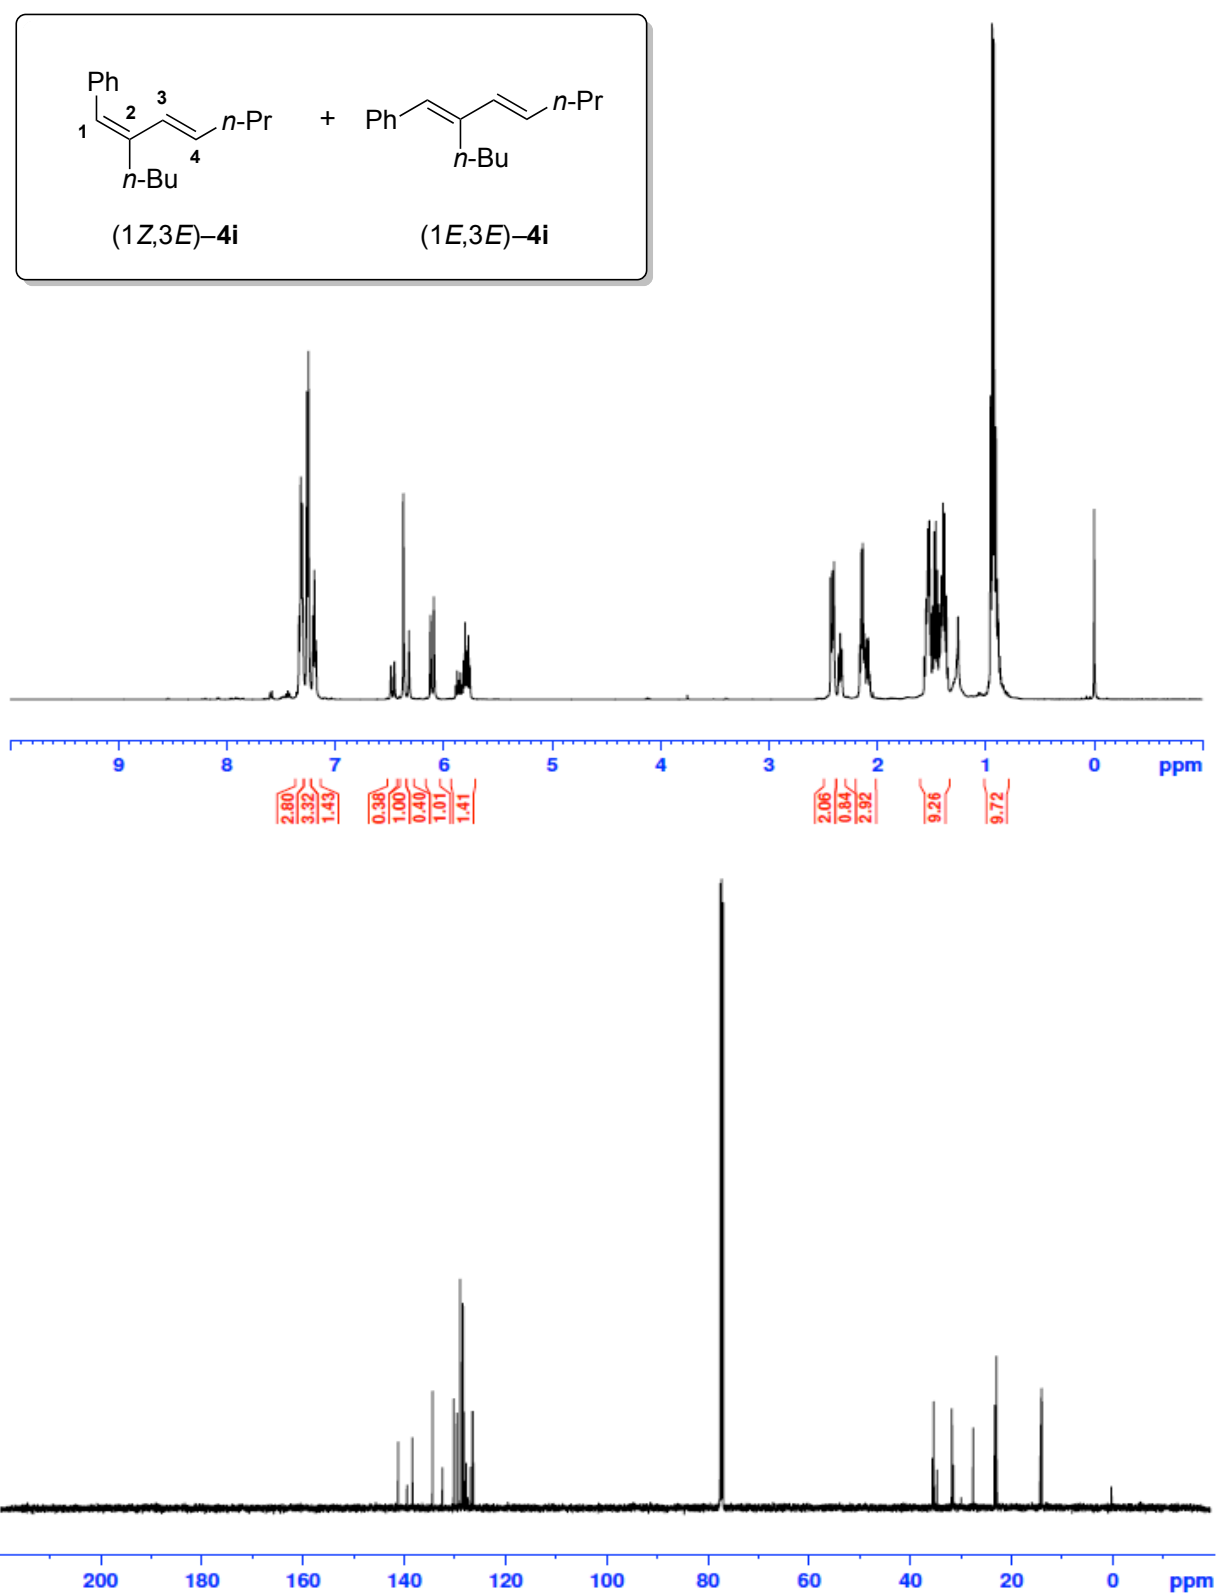

**Figure A- 12.** 500 MHz <sup>1</sup>H and 125 MHz <sup>13</sup>C{<sup>1</sup>H} of ((1Z,3E)-2-butylhepta-1,3-dien-1-yl)benzene (minor) and ((1E,3E)-2-butylhepta-1,3-dien-1-yl)benzene (major) in CDCl<sub>3</sub>.

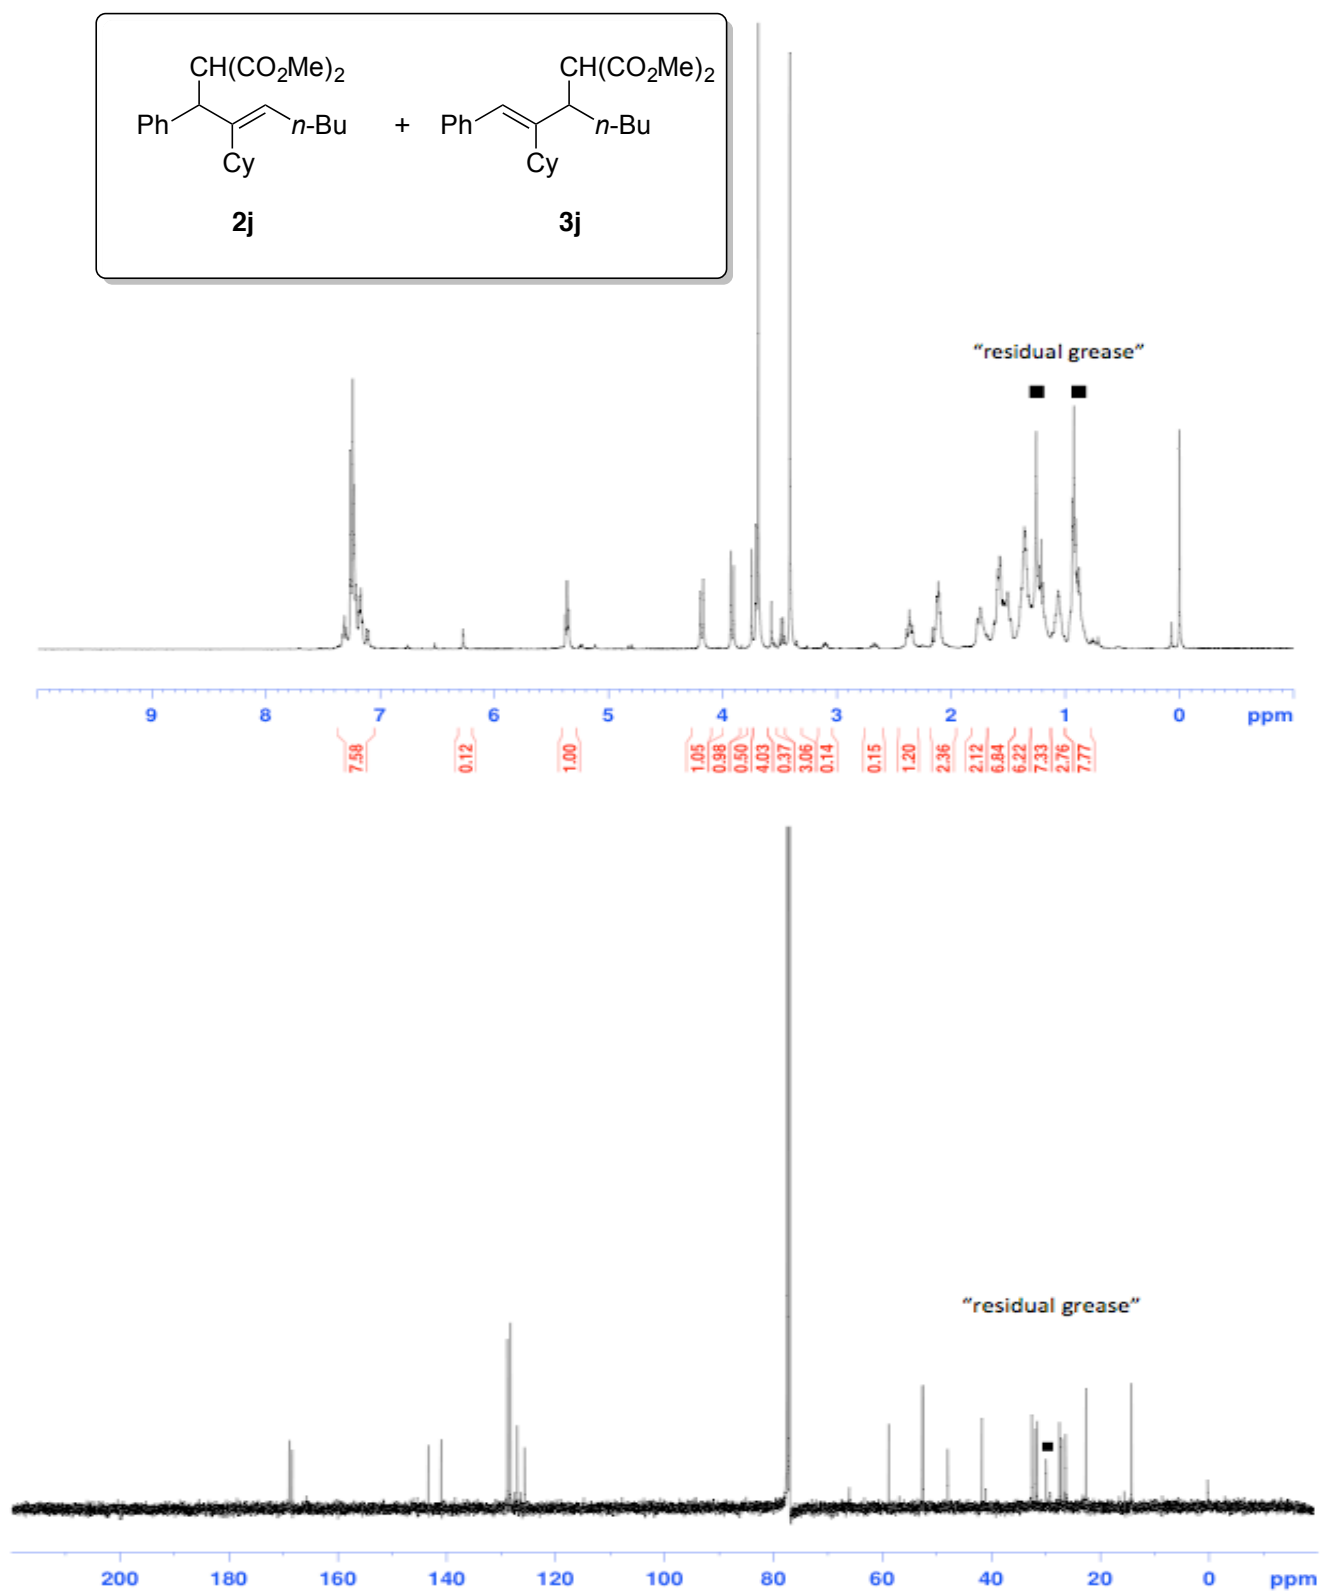

**Figure A- 13.** 500 MHz <sup>1</sup>H and 125 MHz <sup>13</sup>C{<sup>1</sup>H} of dimethyl (*E*)-2-(2-cyclohexyl-1-phenylhept-2-en-1-yl)malonate (major) and dimethyl (*E*)-2-(2-cyclohexyl-1-phenylhept-1-en-3-yl)malonate (minor) in CDCl<sub>3</sub> (Residual "grease" peak is seen.)

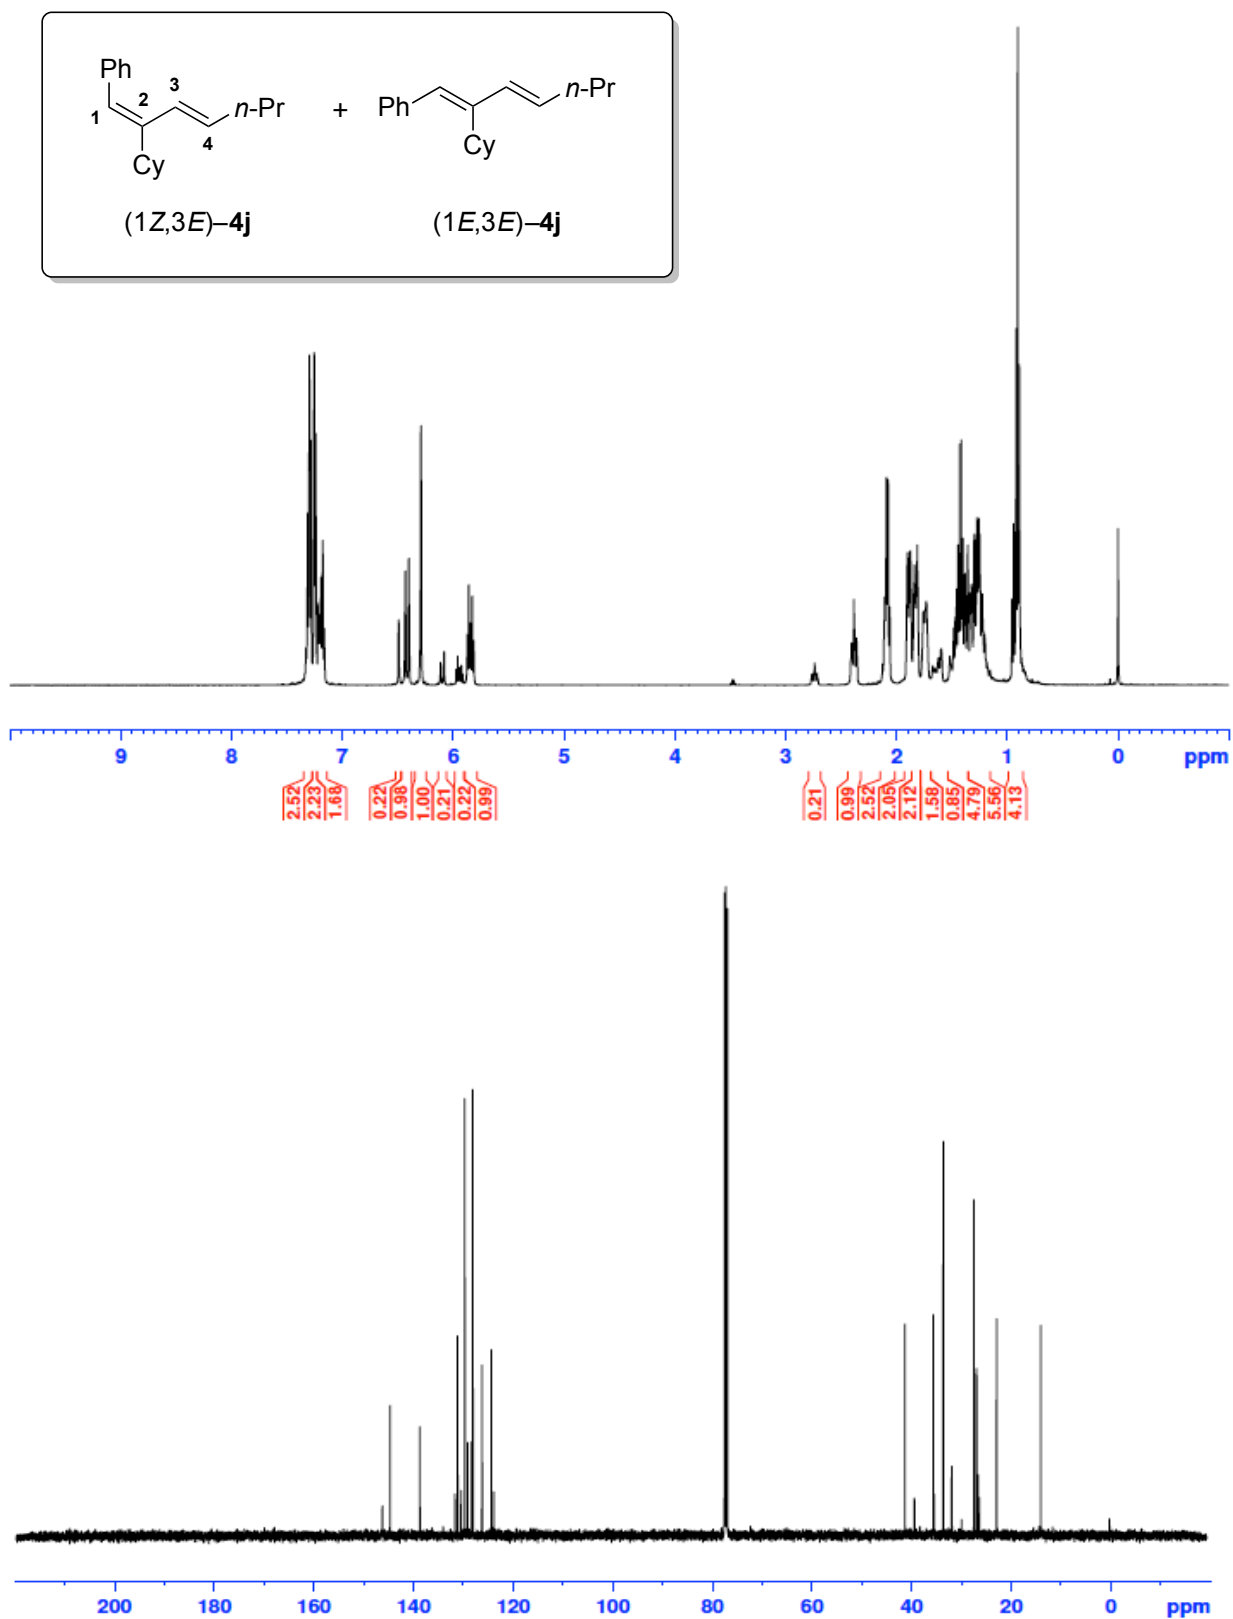

**Figure A- 14.** 500 MHz <sup>1</sup>H and 125 MHz <sup>13</sup>C{<sup>1</sup>H} of ((1Z,3E)-2-cyclohexylhepta-1,3-dien-1-yl)benzene (major) and ((1E,3E)-2-cyclohexylhepta-1,3-dien-1-yl)benzene (minor) in CDCl<sub>3</sub>.

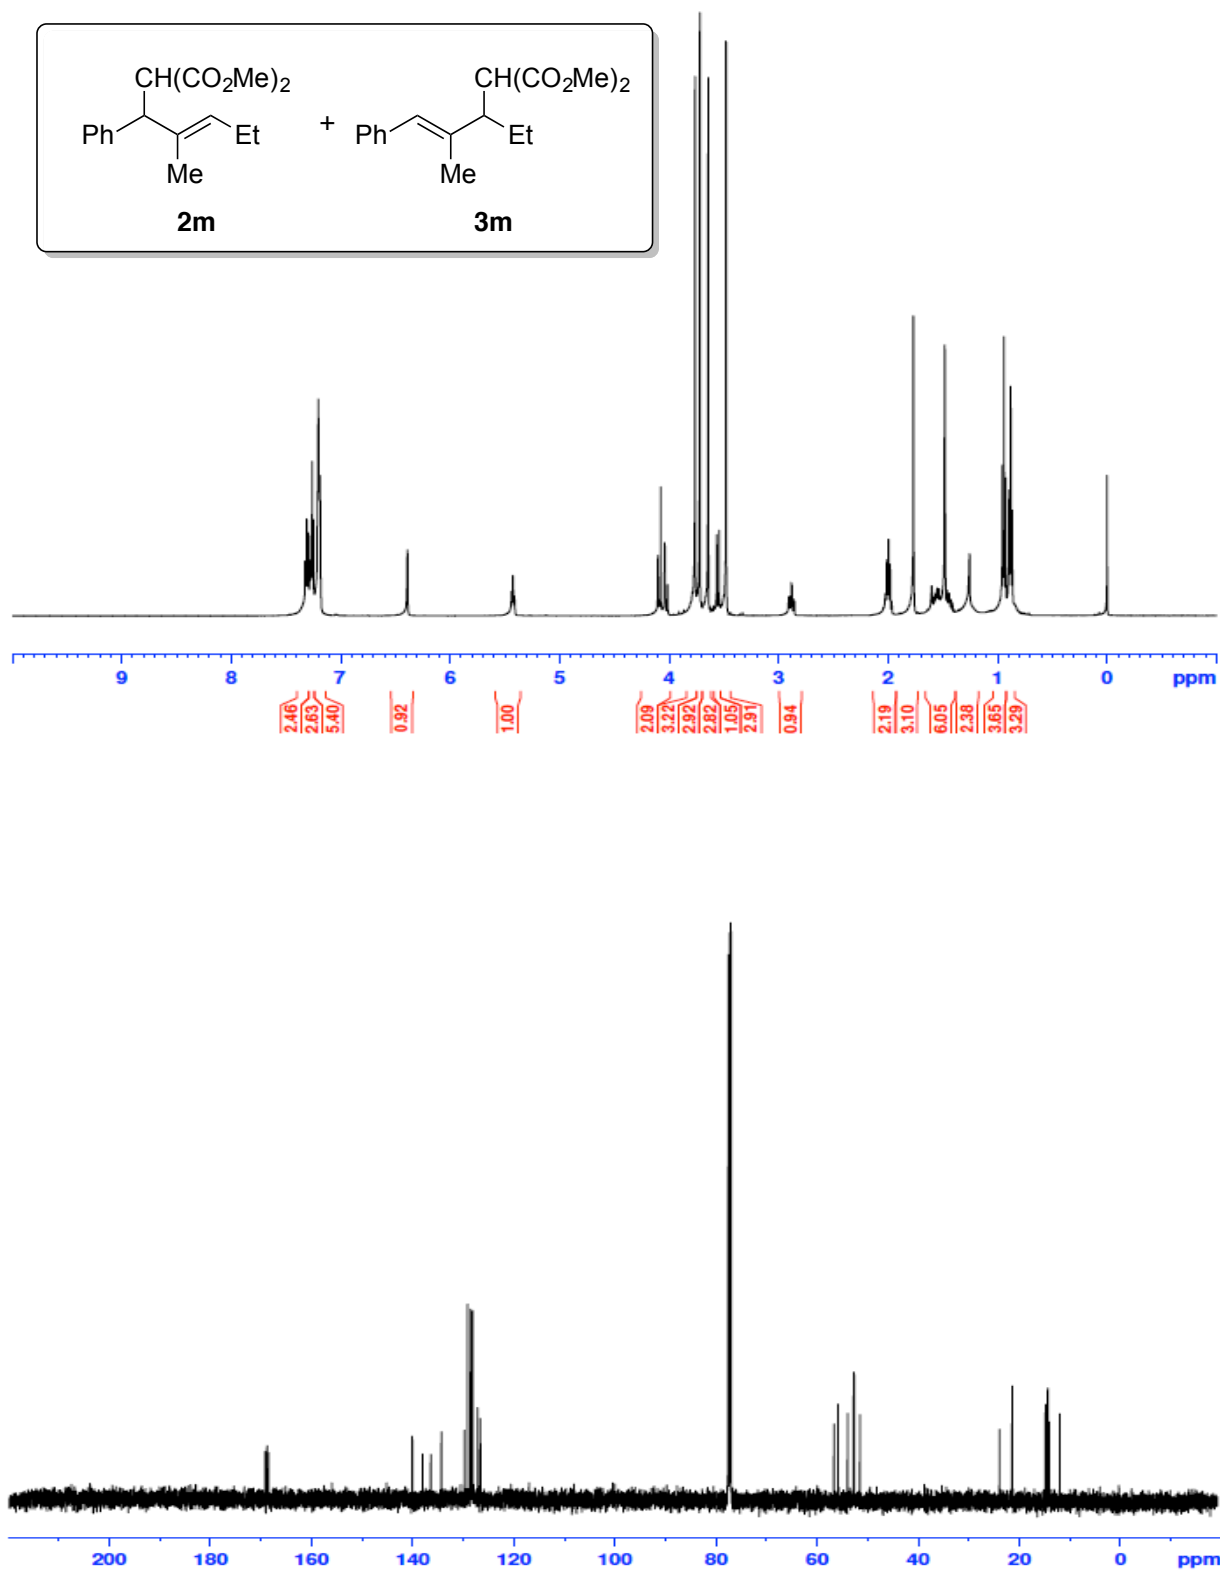

**Figure A- 15.** 500 MHz <sup>1</sup>H and 125 MHz <sup>13</sup>C{<sup>1</sup>H} dimethyl (*E*)-2-(2-methyl-1-phenylpent-2-en-1-yl)malonate (major) and dimethyl (*E*)-2-(2-methyl-1-phenylpent-1-en-3-yl)malonate (minor) in CDCl<sub>3</sub>.
